# Supplementary material for: DoliClock: A Lipid-Based Aging Clock Reveals Accelerated Aging in Neurological Disorders
Source: bioRxiv preprint, doi:10.1101/2024.02.01.578331, version 3 (2025-02-25)
Supplement: Supplementary Table 1 [file 578331_file10.xlsx]

## Sheet: demographics
Supplementary Table 1. Demographics of the processed dataset, including sample counts by neurological disorder status (No Neurological Disorder, Down Syndrome, Autism, Schizophrenia). Gender, age groups, ethnicity, and postmortem interval (PMI; median ± SD assumed to be in hours) are detailed. Dashes ("-") indicate unavailable data.
	No neurological disorder	Down syndrome	Autism	Schizophrenia
count	195	5	15	27
Gender
male	133	3	11	20
female	62	2	4	7
unknown	-	-	-	-
Age
<0	-	-	-	-
0-20	-	-	-	-
20-30	44	-	3	4
30-40	26	-	6	5
40-50	41	-	2	7
50-60	33	2	3	7
60-70	30	3	1	4
70-80	21	-	-	-
80+	-	-	-	-
Ethnicity
Han Chinese	96	-	-	-
Caucasian	62	5	-	1
African American	21	-	-	-
Hispanic	-	-	-	-
Pacific Ocean Islands	-	-	-	-
Unknown	21	-	15	26
Other
PMI median (std)	13.92 (5.15)	6.167 (2.12)	21.08 (8.42)	19.5 (10.68)

## Sheet: lipids
	(11Z,14Z)-3-oxoicosa-11,14-dienoyl-CoA_C41H68N7O18P3SNa	(21-Methyl-8Z-pentatriacontene_C36H76N	(3'-sulfo)Galbeta-Cer(d18:1/18:0(2OH))_C42H82NO12S	(3'-sulfo)Galbeta-Cer(d18:1/18:0)_C42H80NO11S	(3'-sulfo)Galbeta-Cer(d18:1/18:0)_C42H82NO11S	(3'-sulfo)Galbeta-Cer(d18:1/20:0(2OH))_C44H86NO12S	(3'-sulfo)Galbeta-Cer(d18:1/20:0)_C44H84NO11S	(3'-sulfo)Galbeta-Cer(d18:1/22:0)_C46H90NO11S	(3'-sulfo)Galbeta-Cer(d18:1/24:0)_C48H92NO11S	(3'-sulfo)Galbeta-Cer(d18:1/24:0)_C48H94NO11S	(3'-sulfo)Galbeta-Cer(d18:1/24:1(15Z))_C48H90NO11S	(3'-sulfo)Galbeta-Cer(d18:1/24:1(15Z))_C48H92NO11S	14:0 Cholesterol ester_C41H71O2	16:0 Cholesterol ester_C43H75O2	16:0-Glc-Campesterol_C50H87O7	16:0-Glc-Campesterol_C50H89O7	16:1-Glc-Campesterol_C50H85O7	16:2-Glc-Cholesterol_C49H86NO7	16:3-Glc-Campesterol_C50H81O7	16:3-Glc-Campesterol_C50H83O7	16:3-Glc-Cholesterol_C49H79O7	18:0-Glc-Campesterol_C52H93O7	18:1-Glc-Campesterol_C52H94NO7	2,2,12,14,16,17-hexachlorotetracosane-1,15-disulfate_C24H44O8S2NaCl6	2-decaprenyl-6-methoxy-1,4-benzoquinone_C57H90NO3	2-decaprenyl-6-methoxy-3-methyl-1,4-benzoquinone_C58H92NO3	20:0-Glc-Campesterol_C54H97O7	20:1-Glc-Campesterol_C54H98NO7	20:3-Glc-Campesterol_C54H91O7	20:3-Glc-Stigmasterol_C55H91O7	22:1-Glc-Campesterol_C56H102NO7	22:2-Glc-Campesterol_C56H100NO7	22:3-Glc-Stigmasterol_C57H93O7	3-Deoxyvitamin D3_C27H48N	3-decaprenyl-4,5-dihydroxybenzoic acid_C57H87O4	3-demethylubiquinone-9_C53H81O4	5-hydroperoxy-7-[3,5-epidioxy-2-(2-octenyl)-cyclopentyl]-6-heptenoic acid_C19H29O6	Alatanin 2_C39H44O20	CDP-DG(16:0/16:0)_C44H80N3O15P2	CDP-DG(18:0/22:6(4Z,7Z,10Z,13Z,16Z,19Z))_C52H84N3O15P2	CL(1'-[18:2(9Z,12Z)/0:0],3'-[18:2(9Z,12Z)/0:0])_C45H82O15P2Na	CL(1'-[18:2(9Z,12Z)/0:0],3'-[18:2(9Z,12Z)/0:0])_C45H83O15P2	Cer(d18:1/23:0)_C41H82NO3	Cer(d18:1/24:1(15Z))_C42H80NO3	Cer(d18:1/24:1(15Z))_C42H82NO3	Cer(d18:1/26:1(17Z))_C44H86NO3	Cer(d18:2/23:0)_C41H80NO3	Cer(m18:0/22:0)_C40H81NO2Na	Cer(m18:0/24:0)_C42H85NO2Na
DS1_001	63696.3	54346.6	86207.3	2350.56	328.664	7637.77		14776		13430.9	1624.75	5366.98	2034.83	5263.13		117.121	169.982	205.044	763.63	4812.45	1955.61	174.491		22443.5	1202.47	94.9294			63.5725		1.63044	48.308	623.024	668.354	32999.9	32220.6	164.716	541987		3491.49	2218.97	2557.17		104.779	3201.74			2274.25	231.958
DS1_002	10577.7	4255.41	133280	4571.86	185.571	4133.6	104.147	32579	15435.9	53440.6	18141.6	5849.15	1992.76	4601.21	81.8244	342.273	150.48	256.501	1324.42	6317.49	1421.39	564.654	395.928	14087.9	29378	180.96	2141.38	1763.61	198.815	25.9123	1239.62	116.379	3407.72	521.009	62603.1	114938	72.3196	681362	271.38	967.583	3581.74	3364.41	618.709	606.165	21193.3	1015.69	1160.31	12575.2	912.036
DS1_003	10774.4	5235.3	117803	7324.85	50.2756	2944.97	65.619	14023.4	4316.72	18931.1	4314.34	2618.31	3096.34	7905.67	95.3777	185.143	227.05	866.175	1519.79	5019.33	660.388	303.913		16315.3	5632.48		512.277						1580.43	406.202	41082.6	126710	118.611	710518	60.8345	1221.81	2689.55	3063.33	834.105	273.609	8498.11	216.876	275.831	6549.51	134.281
DS1_004	5442.59	1869.35	63106.3	43835.9		6453.01	6506.35	28233.6	106305	36608.9	111568	5039.8	884.858	3971.78	377.33	399.961	561.887	166.917	688.336	5180.18	1425.41	15.7963	61.8507	5691.66	76679.2	5146.45	1372.28	1108.81	2321.84	111.004	352.226	729.004	2721.3	815.042	137832	41494.5	41.4014	421017	100.302	565.694	1673.91	4559.67	1803.92	2396.42	54779.4	8127.66	1256.51	43568.9	6902.75
DS1_005	9594.92	1336.46	91337.4	10414.1	40.9777	5650.35	709.895	30607.6	39219	51279.1	69664.3	5662.39	1445.14	5218.57	104.898	164.706	483.796	218.155	1519.73	7187.64	1309.04	128.012	918.386	10570.1	72362.3	2506.44	5700.03	5564.17	1117.99	56.0864	3943.8	1318.26	762.343	740.296	101411	83053	37.6865	501963	212.749	515.01	1329.25	1371.76	2575.82	1356.5	46880.3	3840.71	3097.48	28848.5	2563.89
DS1_006	6946.26	4945.82	87266.4	6420.09	75.8151	4804.17	165.282	32826.7	1300.86	30983.4	3134.35	5819.6	2119.88	6044.91	251.678	593.116	192.407	143.465	3041.29	7686.37	1825.21	628.224	4.00876	11279.8	4461.69		116.806	173.938	24.839	3.51186			3112.67	442.196	40524.6	110908	46.1084	393905	87.7792	709.313	3103.46	7684.32	866.255	403.07	8080.83	108.127	259.992	6463.49	73.7845
DS1_007	70596.7	60823.4	104302	6177.82	380.954	2333.13	39.3001	32374.3		40416.3	3912.43	7274.92	2420.26	5378.7	70.7632	114.009	133.79	121.004	3803.27	6321.68	1207.42	268.316		26960.4	1360.16	83.7257	0.211419						2583.56	828.241	29947.8	157496		487973		852.792	2455.87	1990.01	1168.47	443.825	8354.14	196.299	469.303	5409.86	209.893
DS1_008	8158.19	5481.19	90048.9	5995.07	130.884	4201.95	193.084	57475.6	7525.92	52585.2	15528.9	14366.5	2421.83	11423.6	124.775	629.277	302.856	371.27	1686.95	6801.97	834.708	553.636	174.942	13206.9	12509.4	17.9609	1015.11	806.762	19.0533	6.00985	370.066	76.5461	2131.3	915.256	61397.9	127686	90.0861	584236	173.039	1129.36	2784.59	2498.08	1138.08	1090.18	21617.8	719.493	1377.31	15455.2	442.138
DS1_009	6219.4	2360.53	78504.1	6549.52	268.046	3543.28	442.789	40221.6	27686.4	55309.9	50838	5945.26	2335.61	12563	160.238	45.0452	605.088	201.408	386.399	4423.25	680.077		906.185	11205.9	76003.3	1999.97	5799.49	8814.15	654.088	118.262	5547.46	2378.98	472.047	749.57	153957	50716	41.8774	648401	142.293	936.12	1504.18	1817.89	895.446	2411.04	41580.9	2874.57	3223.5	28533.5	2120.05
DS1_010	5266.95	2399.1	60984.1	6008.41		2669.89	83.4716	51790.3	36862.2	48263.9	65629.7	9745.82	1416.34	19219.5	206.943	151.303	404.781	119.294	701.651	6410.51	784.095	106.162	475.92	7485.64	64240	2346.33	2500.1	5090.9	962.984	99.4896	1910.57	1321.69	1505.82	839.725	141694	37288	33.9383	456472	132.808	573.763	1214.83	2758.1	1727.88	1719.51	41678.7	3006.15	2915.8	30891.8	2234.6
DS1_011	7076.76	3440.23	84187.7	3772.12	447.03	5093	143.353	73530.1	12763.7	72090.3	45966.4	16203.3	1536.38	4714.17	110.72	163.745	628.265	448.921	2293.95	6239.93	647.163		562.653	12747.3	69596.7	1240.69	4637.79	9275.18	334.859	117.744	5608.78	6133.6	761.065	1218.05	104226	119980	38.5335	528142		745.525	2294.74	2612.32	322.178	684.682	24562.1	1059.06	2955.6	14038.5	649.493
DS1_012	6441.86	2857.96	81849.2	7353.61	64.0871	4519.05	387.781	43991.7	21036.4	58532.5	40593.5	9612.36	1414.27	8179.13	141.988	272.892	270.442	160.616	1982.3	6608.73	1212.71	142.589	188.241	9424.74	51125.2	911.046	1756.16	2144.66	1207.9	92.1773	475.428	3150.5	4256.35	612.753	140014	96178.7	56.9132	455434	201.596	688.664	1766.14	3470.37	701.519	858.767	20931.9	1192.99	1200.93	16387.7	884.051
DS1_013	9838.87	6842.08	114371	14045.2	196.081	2951.44	236.149	29180.8	7876.56	49807.8	13997.8	6233.66	2727.07	7860.12	143.519	549.204	350.087	531.234	2848.44	5357.61	658.264	697.962	212.541	15769	18567	7.08492	1694.22	1029.09	123.246	16.8802	1439.58	348.203	1894.8	238.345	51149	182410	106.27	654736	211.088	793.715	2837.42	4053.29	629.108	314.037	13770.3	519.307	940.63	7880.27	275.86
DS1_014	4751.74	1484.96	92615.2	13364.6	50.1709	6334.43	625.241	56317	2623.02	44654.4	6779.63	16540.5	2036.65	6280.23	241.266	166.837	262.808	273.073	3548.03	3700.91	1540.36	168.063		12402.6	11893.6	55.8069	895.855	782.508	93.1751	25.959	279.665	118.071	2174.39	591.508	33635.5	134979	37.0582	377125		616.387	2964.18	9869.3	1004.81	374.385	7194	240.406	291.531	4859.89	134.267
DS1_015	12238.7	15336.8	87920	5005.17	401.636	5382.15		10451.9		11311.7	1683.39	1898.39	2253.86	7114.24	40.5863	192.15	100.843	804.136	580.227	5558.81	1072.65	334.095		15022	735.583								352.39	458.367	21958.8	30727	80.3378	567530		2643.36	1621.48	1966.2	151.35	340.394	8839.86			6823.27	193.594
DS1_016	10322.9	6618.24	140816	6985.83	136.025	2023.35	117.434	29596.8	3703.86	54848.7	15702.7	4879.14	2177.63	6072.11	160.179	272.73	426.644	179.935	5857.54	3124.68	473.428	138.84	875.705	17096.3	38956.9	884.709	3215.63	5882.89	103.706	52.5149	2857.59	2141.29	613.797	204.388	78066	299153	102.858	897939	198.714	499.674	4269.88	5420.17	349.387	112.308	8523.98	202.081	2425.71	4409.27	255.014
DS1_017	8468.05	4082.23	90029.6	6165.47	222.008	2375.29	146.439	39291.2	1633.77	47628.6	4037.84	10378.6	2266.16	61486.3	70.868	163.911	170.22	454.106	1307.18	6082.51	520.352	259.204	137.915	15222.2	6803.66		653.705	455.446	77.0172		202.523	216.363	806.595	815.45	19650.4	64493.9	66.7872	522309	125.831	1159.52	3527.96	4947.03	4160.22	5293.43	76988.3	6036.22	3158.97	59903.1	3778.54
DS1_018	5070.61	8755.15	104703	3907.36		3862.37	311.201	15943.7	1149.66	22713.5	3636.37	2969.32	2883.35	7685.79	113.918	233.659	124.239	704.436	2670.08	3605.43	1134.77	331.478		13591.7	3355.81		184.388	226.193		0.393868	159.451		1036.39	259.839	29721.6	121178	36.2777	605729	112.818	800.704	4719.73	6910.6	1072.38	265.864	6264.62	135.394	319.728	4803.39	289.27
DS1_019	3469.36	1017.46	99888.3	4776.71	112.809	3546.53	326.482	40364.4	38514.9	75798.7	171319	6770.56	1426.49	3489.58	245.451	225.969	1204.21	121.228	1964.59	3311.88	713.389	94.0758	341.454	7699.71	171659	2396.38	723.276	5938.63	2994.98	269.83	1521.02	10929.6	577.443	403.418	247840	141862	41.6153	686838	164.229	521.326	2346.1	3513.39	926.738	801.35	33118.7	2690.78	1739.86	26451.9	2184.93
DS1_020	7922.96	4191.21	110939	6599.53	182.258	3260.05	111.527	39168.6	4394.9	48820.9	9795.12	6986.45	2171.57	6373.61	129.274	286.742	364.86	282.066	5166.63	4791.21	982.591	298.162	176.676	16912	22776.6	91.9254	845.365	2215.74	194.004	33.8228	751.591	1354.17	1304.2	678.379	54529.8	171309		546057		1072.77	4214.61	5980.54	305.317	272.749	8563.12	210.778	932.092	5557.45	306.613
DS1_021	6650.84	3977.46	82520.2	6646.85	32.3453	6514.12	183.084	70693.7	4958.78	49805	17249.4	15814.6	1549.63	5449.63	64.3779	249.704	329.252	117.717	6203.55	3268.05	1499.24	335.49	519.798	9847.64	19121.9	304.325	2174.49	3464.68		31.6695	1376.18	1041.54	1726.35	627.885	47857.2	173699	44.932	474047	188.309	474.243	3269.81	8270.56	747.317	55.5598	8819.95	175.403	1498.01	4455.72	324.262
DS1_022	6066.4	2459.15	103945	9827.8	1284.58	3249.38	1099.42	3546	142952	30718.1	485231	280.772	1155.64	3130.3	486.964	780.765	1321.66	492.763	1.82405	4964.38	352.286	218.072	519.79	766.111	180589	4765.84	1911.96	7917.54	4395.75	296.617	2386.54	4495.35	1041.4	1846.83	454288	14119.1	41.9714	1.00511e+06		1845.52	923.05	549.416	1331.62	3154	83193.9	4485.62	3762.82	67395.1	4103.1
DS1_023	17630.1	12724.7	7377.16	1189.92		110.892	223.192		71745.4	23260.3	995293	310.181	1949.58	4940.66		560.215	202.501	1009.52	29.5804		77.99	774.989	596.463		65907.3	1813.95	2628.68	7333.84	763.099	115.108	2978.35	939.57			96255.2	2224.37	519.107	1.544e+06			361.039		101.798	486.854	19594.1	453.675	2675.35	10525.8	908.931
DS1_024	6305.23	3717.36	82571.3	5341.44	674.527	3903.26	237.429	51238.9	26628.8	50199.7	165533	11367.1	1366.43	4567.71	175.434	335.672	1754.71	108.544	741.3	3729.11	528.571	86.7513	180.414	7289.78	82580.3	769.906	188.4	2319.16	2173.93	217.856	215.607	7306.01	410.098	787.423	227208	47736	36.9152	544750	157.151	631.125	1954.71	2737.34	452.878	2101.88	40273.2	2432.4	1247.12	32719.6	2140.94
DS1_025	5203.72	3261.56	112817	7004.35	1771.71	7664.11	1195.5	4933.65	73593.5	34070.9	533039	610.977	1580.03	4001.03	630.7	640.712	1659.92	115.951	70.5576	4777.57	389.79	234.337	297.34	1189.5	107210	2501.05	868.109	3665.92	3574.76	179.399	979.74	7549.01	852.657	1143.17	429418	15300.1	68.543	695815	60.9262	687.82	846.451	312.128	740.405	2868.33	60569	3159.71	2402.21	50902.9	3480.57
DS1_026	10441	4537.76	127250	3370.7	300.083	4109.05	154.055	36266.6	7244.86	57369.5	24092.9	9921.45	2413.87	6383.44	133.371	6.48823	429.171	396.718	3923.26	4086.37	819.307		699.316	16433.3	46442.3	302.658	2218.18	6808.78	453.02	22.018	3365.83	3827.95	800.688	453.183	85982.4	231488	63.7661	701016	109.524	602.342	4116.69	5524.84	303.647	191.479	13930.5	391.018	2747.68	7499.39	224.822
DS1_027	6814.24	2687.38	104793	2435.21	327.666	4593.02	91.7109	83086.4	6358.19	72427.9	29011.1	18362.6	2249.07	6219.71	213.305	266.308	350.033	325.756	3275.36	6038.27	621.087	268.817	338.374	17294.6	50282	632.937	1661.13	4620.29	239.629	84.2635	1981.05	3365	1117.59	690.968	125291	225094	136.821	587481	238.425	1150.09	4035.84	4956.78	774.214	1072.56	26310.4	696.407	2271.24	20082.9	649.566
DS1_028	8633.14	3271.33	86156.5	2713.61		4067.55	156.464	58373.5	13704.9	64612.2	78622	11204.8	1476.56	4082.99	55.5861	139.847	434.262	67.9349	1278.31	3300.97	648.211	122.584	732.305	9888.34	104793	2176.36	4516.28	11941.8	1316.74	160.697	5176.14	7388.24	834.564	669.135	125841	93537.7	39.1877	525438	378.149	592.282	2594.62	5268.8	481.042	488.931	26977.3	1524.7	3558.12	15412.9	1245.85
DS1_029	4147.21	613.728	71823.4	2509.37	72.4707	6056.63	183.22	54227.7	12944.2	53404.1	50586.2	12109.2	860.881	3302.38	187.009	180.697	686.726	196.809	2223.41	5761.51	1087.84	58.1393	416.471	5915.58	84572.9	1843.42	1976.07	7578.05	1354.95	112.671	2812.13	5617.73	1896.43	656.032	134118	105662	54.4961	356810	83.4084	513.573	2075.09	5958	1137.57	431.971	21255.7	2126.96	2686.19	15474	1372.37
DS1_030	7824.14	3657.01	100801	8256.13	450.405	2974.1	227.853	57825.2	3142.52	56698	10990.3	11901.4	2047.61	13057.9	264.937	5.52938	368.645	385.316	3337.96	4679.22	543.584	368.063	223.576	11645.1	24406.3	223.199	1305.92	1436.69	71.3286	17.2307	1318.51	997.354	2122.16	678.664	88638.7	161646	68.0744	558336	113.983	710.709	2426	2816.59	1458.2	1698.23	43929.5	1285.17	2353.14	29949.2	825.58
DS1_031	7353.93	4824.41	109807	3610.1	349.892	3457.46	77.8481	78244.1	3201.86	81819.4	11094.3	15419.8	2727.81	7399.22	29.4351	250.911	563.277	242.261	3521.48	4993.44	605.817	314.716	177.23	20885.6	32353.3	167.678	1195.44	2310.48	34.2882	12.7466	1140.16	1203.25	907.639	822.419	76869.7	245111	82.6693	614470	170.762	1363.37	2457.75	2617.51	695.944	529.715	14170.2	696.021	1500.83	9797.71	488.458
DS1_032	6887.13	2956.3	95716.6	2752.33	119.179	5678.03	122.92	71179.4	5958.76	65947.4	29063.1	16564.7	1533.28	4666.14	72.3512	11.0984	634.174	257.711	3132.13	2398.08	984.266		775.072	13668.6	45002.8	929.959	2717.43	4972.57	418.41	160.309	2485.05	3536.41	1800.87	622.323	103563	173834	41.7055	571266	241.195	583.008	3397.84	4873.93	505.432	448.405	13069.1	495.154	2325.27	7514.43	57.6532
DS1_033	7143.75	2530.3	85788.1	4678.24	131.698	4184.39	365.112	55516.4	14200.4	67865.1	74265.5	13037.2	1497.76	4593.96	61.0928	63.9445	937.611	260.251	2347.24	1557.41	1049.69	554.236	938.763	11733.1	85778.1	2444.71	4897.85	18290.6	954.137	118.746	6821.03	13115.7	1345.34	455.402	111056	157332	32.9164	600661	160.069	465.424	2653.84	5085.42	411.779	323.73	19610.7	755.836	4332.71	10157.5	614.19
DS1_034	55949.2	39006	2977.35			103.138			362.257	1204.32	2336.68	18.7259	7232.65	27901.9		1153.98		2620.21				2454.53			2200.19	216.013		224.916							587.798	6892.98	182.422	2.1403e+06							277.326				592.976
DS1_035	9850.44	7035.64	99181.9	2524.45	635.061	6391.46	75.4135	100492	3613.3	74411.8	17850.8	21747.2	2145.37	6620.95	69.7374	219.936	263.097	321.747	3925.32	7203.2	880.117	206.761	353.157	11543.8	32330.5	221.311	969.919	3782.44	258.395	50.3769	1649.25	1845.6	2249.35	1190.35	79542	164918	42.9478	469300	98.8603	915.534	2806.23	4372.21	839.965	436.27	13512	643.454	2032.44	9036.89	381.913
DS1_036	5094.79	2203.54	75112.6	3343.58	62.9115	5537.2	272.596	63414.9	8370.57	59718.6	49400.3	11323.1	1287.98	5196.07	149.709	176.006	686.76	93.2365	2347.9	4120.18	1182.29	130.319	544.805	7234.9	97924.1	2173.06	3300.56	13444.6	1478.16	172.063	5339.17	9390.47	1027.11	817.532	133813	111623	37.9377	408220	196.142	220.493	1790.09	2758.76	625.954	487.178	26303.2	1323.63	3933.34	15737.4	890.504
DS1_037	13555.5	6776.1	119181	1526.73	161.743	3243.36	71.1413	44056.5	8950.67	61888.9	35779.8	9576.68	2564.77	7928.43	47.1772	262.76	519.714	247.126	3624.99	3157.76	645.602	358.427	492.6	15471.2	47065.1	563.295	2727.83	5668.58	365.659	58.2176	2788.15	2134.65	578.31	851.858	99780.5	173603	61.3763	674335	68.6493	1036.88	2701.28	2768.59	728.024	487.112	20613.8	940.691	2367.67	13159.3	518.55
DS1_038	7715.5	5122.33	104301	6252.72	397.836	4444.89	50.9164	101126	6217.82	79449.3	27566.6	20194.9	2492.76	6297.75	44.2154	239.569	426.066	289.861	2877.97	4101.95	360.32	698.988	780.142	11753.6	43982.7	1000.63	2462.91	5608.58	443.838	70.1117	3130.5	3981.03	754.53	866.599	117232	196482	73.2752	559900	56.1034	713.403	2654.84	3440.79	292.138	294.017	14095	420.533	2056.85	7942.05	607.221
DS1_039	6928.2	2490.74	85213.8	4113.77	54.2675	4039.5	154.408	87815.7	9400.05	72961.6	27007.2	19537.2	1112	3773.63	180.042	457.156	561.024	209.765	2325.04	3273.53	1007.1		1564.18	11437.5	66844.3	2221.59	5419.1	9957.74	642.811	115.373	5579.77	4578.26	1457.63	575.531	115520	199290	54.7419	606725	140.316	540.928	2633.38	4789.09	440.47	171.179	14083.5	729.345	2990.96	7181.48	454.978
DS1_040	4325.98	2138.73	82485.2	4350.1	168.858	5140.44	404.333	49768.2	14049.4	62858.6	69528.4	12774.2	1082.22	4881.93	142.545	125.991	553.929	228.697	2486.49	3009.29	1069.13	100.969	398.765	7281.75	70202	1500.53	2070	8625.56	764.854	82.0689	3556.85	4141.45	1190.06	399.129	111751	112273	25.3607	463815	132.847	524.858	2607.75	5387.24	647.43	666.133	26796.2	1117.64	2445.73	16533.8	861.09
DS1_041	6557.07	2876.18	79794.4	3588.65	108.019	4307.42		70711.6	9459.82	59530.1	29484.6	15019.9	1488.13	5111.86	186.626	180.9	541.853	242.387	2832.67	4904.39	957.471	135.9	718.751	8146.28	68285.4	1650.18	2471.29	7002.93	496.423	147.806	2830.34	5668.69	1878.38	851.141	106451	119324	29.1579	456054	198.319	686.936	1944.17	3102.54	526.221	222.032	15006.1	909.367	2641.96	10684.5	573.132
DS1_042	7547.95	3220.59	93037.9	3306.52	389.882	4493.36		66565.8	18773	58485	86629.7	12062.8	1424.32	4180.95	100.924	253.44	453.167	202.523	1767.15	4326.93	582.734	269.291	438.87	9192.81	86335.8	673.42	965.421	4093.3	1596.84	205.01	874.975	4139.49	901.901	932.634	183297	86662.8	33.9253	591574	223.425	610.577	2467.39	3354.17	385.801	759.102	24274.6	1283.51	1556.19	22609.2	715.791
DS1_043	4731.01	2028.38	70176.7	2610.02	104.051	4601.82	119.506	68845.2	12221.7	60601.2	43478.9	15491.2	1811.37	5978.51	208.848	140.118	882.942	175.366	1266.68	5321.86	759.524	49.4011	258.153	7170.2	68314.3	2031.79	424.929	3710.85	1954.23	187.255	727.858	6849.24	793.797	695.476	166849	64649.3	35.5089	413513	205.739	566.513	1827.12	2867	996.717	2747.85	47975.9	4371.2	1812.88	38443.6	3803.67
DS1_044	5723.48	2643.48	89368	4871.2	278.733	4321.6	323.263	39081.1	32748	68990.1	144899	8874.47	1419.14	4104.62	189.665	314.411	916.161	120.589	1169.78	2967.74	472.745	114.068	798.859	5688.31	152914	2393.93	2406.43	13996.9	2016.6	319.757	4127.87	14419.7	1364.5	479.691	194873	53629	45.7862	615084	255.892	727.72	1845.6	2402.68	227.237	1195.54	33697.3	2372.13	2820.97	32332.3	1783.94
DS1_045	8424.57	3408.13	97474.7	2864.18	476.409	3349	164.234	82334	12129.4	71231.2	55839.1	15596.5	1576.38	5620.92	61.0867	511.055	532.804	252.994	1785.98	5463.3	519.467	529.292	1162.2	12369.4	71678.7	1508.4	3551.58	9121.37	726.963	138.192	4040.97	5609.78	866.034	1062.12	157794	116826	27.5401	710086	68.4158	634.799	2629.79	2654.27	249.247	524.583	19866.3	743.3	3343.57	12633.8	606.212
DS1_046	7820.31	3581.04	102987	3658.73	164.895	4184.92	373.442	41572.5	8447.61	60616.5	23569.5	8790.36	2306.8	5024.17	55.1678	94.5774	345.315	143.891	3093.35	2733.39	990.441	249.715	1562.73	11514.5	61291.3	2309.7	4693.34	11979.1	506.464	133.356	5714.97	6786.95	2207.97	353.145	96901	204775	51.1667	602252	210.858	832.233	2926.12	4782.3	540.354	269.071	18390	648.179	4140.56	9618.09	626.67
DS1_047	7630.48	3821.54	99645.5	4042.2	161.559	3179.32	81.4216	25377.6	28976.2	39615	85937.8	3561.3	2007.36	3409.58	176.533	157.127	1176.32	177.635	1596.87	2873.17	684.968	145.151	280.111	9854.99	68241.8	895.508	1137.34	3805.29	1480.19	207.546	935.994	3276.05	585.984	362.014	175785	94169.3	55.5891	838385	93.1592	541.288	2782.69	2924.85	455.183	625.281	23488.8	829.329	1497.73	20542.2	567.723
DS1_048	79043.9	63417.8	125951	6764.88	132.69	2509.23		41600.1	7377	66365.8	21565.4	8622.98	2054.14	5238.59	22.7702	107.147	653.131	229.85	3009.05	4018.52	796.287	147.773	883.416	19237.5	76314	1566.74	3034.08	4899.92	403.871	121.656	2225.21	3103.32	717.282	606.145	111463	247464		729230	124.783	22.7156	2838.6	3048.26	331.391	368.058	17674.3	714.567	2330.33	9158.32	300.534
DS1_049	8670.95	4237.26	112684	2666.22	195.5	3290	39.1698	38090.6	16794.8	73815.3	70507.6	6892.61	2236.79	4215.71	161.387	176.931	572.694	497.128	2468.25	3735.62	475.503	312.91	536.606	9267.24	93564.8	1487.04	2731.01	9003.28	778.006	191.39	2760.56	8204.87	1887.5	184.277	140913	129215	61.7939	767583	241.314	911.546	3843.93	5532.57	106.385	264.144	16432.8	568.226	2739.78	13245.4	487.43
DS1_050	6263.82	2784.38	113254	1692.79	261.347	4888.33	65.0337	83392.3	4319.96	89636.6	22569	15679.5	1847.98	3910.98	166.987	289.326	802.888	261.915	4446.94	3416.28	1328.74	358.191	387.397	17185.7	67773.4	804.21	1803.3	4467.36	354.642	101.933	2175.33	4179.21	2479.75	711.44	100726	181520		603719	498.501	458.534	2908.07	3420.11	201.537	372.776	12607.5	356.83	1843.94	7505.74	236.861
DS1_051	10237.6	3951.62	120367	2169.58	81.987	4060.03	101.748	56707.2	3344.84	75577.4	19289.3	11554.3	2489.21	5290.68	16.7535	247.174	492.429	195.329	3374.58	3414.99	809.637		679.215	15180.3	48982	1258.45	2543.1	4883.93	176.813	59.8251	2127.56	3606.82	1770.26	584.752	109085	163745	85.059	682920	296.985	878.681	3824.06	4581.91	479.667	137.734	15021.3	560.566	2725.31	8485.23	194.495
DS1_052	4745.87	2023.7	71104.2	12158.1	93.9093	4905.71	783.75	51467.5	37884.5	51197	175130	11001.5	896.168	3045.46	323.11	296.714	1154.18	245.41	1118.08	4655.78	980.064	97.9222	117.06	5525.75	72606.5	2247.94	508.379	1745.4	3164.79	131.514	275.783	4449.59	1375.44	600.403	247973	74943.6	39.9074	411939	241.595	496.847	1572	3054.6	731.293	1526.74	39294.4	3161.72	947.965	33748.9	2543.58
DS1_053	5401.69	3832.07	88687.8	7274.43	302.531	3755.21	539.917	29429.4	40792.8	52552.6	219687	6917.96	1196.56	3437.98	155.569	761.388	1240.64	148.916	463.565	5277.74	872.125	278.473	277.694	4174.9	97038.2	2194.73	732.52	6539.48	3365.52	202.206	1405.86	11814.4	660.65	1093	277836	41880.6	41.8358	486334	202.626	461.22	1893.03	2325	792.485	2249.54	58528.1	3452.11	2057.04	50423.9	2604.23
DS1_054	5854.19	2526.3	81243.2	3164.63	104.81	3653.31	237.393	63511.3	11459	55348.5	49179.8	15414.3	1566.12	4012.65	142.065	155.802	569.174	128.655	2451.91	2506.61	1218.96	166.553	565.25	7985.36	61268.4	874.028	1341.88	4660.81	1244.88	125.461	1665.27	4424.97	811.002	611.314	155911	125449	32.7841	469762	328.523	595.939	1941.65	4845.48	422.899	617.974	18600.8	1071.46	1171.07	14265.5	1061.62
DS1_055	7396.24	3054.09	103601	2914.36	192.964	5039.97	348.539	66426.4	5336.41	64917.5	17135.8	14904.8	2059.51	6060.61	60.3316	176.827	319.481	355.122	3182.73	3583.59	1430.48	294.297	1153.6	9465.25	57062.5	1527.94	3011.34	9217.18	506.167	143.564	4465.91	5558.5	1454.66	547.354	79934.2	151161	49.752	533764	270.07	625.319	3420.5	5239.92	484.505	281.199	13396.7	332.88	3648.66	6969.97	332.898
DS1_056	3162.69	2257.2	104588	12542.2	1218.98	5079.13	1444.01	4457.87	94729	35214.9	1.01111e+06	778.364	1127.18	2895.85	405.152	905.221	848.861	366.696	3.59039	8576.83	362.984	193.682	1868.46	263.191	192876	5650.18	7209.29	39103.7	4241.17	301.458	9883.94	26158	745.962	1463.94	354410	8297.5	46.7912	800042	165.038	1089.65	1698.41	1497.48	1076.3	3131.73	75935.6	3875.44	8091.08	58044.5	3314.24
DS1_057	5133.35	1745.95	124656	4534.75	817.584	4580.06	737.696	25489.7	40464.2	70854	162335	4698.98	1963.11	6315.75	398.899	281.089	960.669	186.634	1396.27	3489.93	637.169	179.103	1053.38	4042.45	182779	2797.89	5011.97	12440.9	1713.3	292.348	5211.43	10749	798.566	743.983	169262	61441.6		923129	63.9121	404.8	1881.32	1634.5	198.419	661.03	30508.3	1395.81	3837.32	20097.3	1520.99
DS1_058	7438.62	3456.37	103658	3961.36	65.5776	4675.16	393.179	56991.3	9190.86	60703.1	18294	9723.03	2192.8	6955.4	232.221	238.55	308.084	262.8	4894.15	4783.82	1015.83	174.905	992.322	12728.1	48178.1	1653.8	4200.8	8437.1	405.114	78.719	4647.68	3365.44	1525.28	644.609	87495.4	234581	42.3237	565577	183.018	663.635	3036.87	5338.02	743.991	252.456	17269.9	801.55	3375.08	10021.4	314.94
DS1_059	6045.1	2756.54	85151	3142.13	195.035	5254.06	230.193	58318	21741	53389.3	106295	10084	1352.13	3864.4	106.218	262.228	1364.39	199.567	795.797	4130.54	1070.29	127.048	298.255	7414.94	92112.2	1058.18	741.598	5426.79	2018.64	173.224	961.641	8395.09	945.642	1095.62	211437	41888.4	32.568	456680	311.74	572.139	1941.78	2056.87	532.534	1911.28	41012.9	1699.52	2060.53	34047.7	1338.01
DS1_060	3456	1418.28	63610.4	12159.4	296.349	8197.93	838.442	28991.5	88003.1	32889.7	430187	7339.74	850.056	3566.66	653.275	988.302	934.996	67.6257	90.265	8354.96	813.294	90.732	736.161	2709.56	122527	3018.16	1900.22	10150.6	5064.62	446.105	2632.52	11893.5	1249.11	1549.97	269166	14989.1		339595	142.665	780.653	1952.92	2790.16	979.049	1644.55	50435.7	3601.21	2915.72	44651.9	3492.9
DS1_061	3983.02	2051.66	82188.5	5342.48	319.38	4505.92	249.766	67624	25298.5	59789	154150	14914.2	1139.09	3893.43	203.065	277.036	1285.32	108.715	1213.05	3605.3	515.758		406.447	7019.63	80365.1	1388.62	908.153	3889.04	1781.46	156.95	1176.96	6087.79	896.732	766.965	177849	74247.4	38.335	491960	475.761	292.688	1451.74	2012.13	426.937	717.543	24482.8	1881.38	1481.81	20745.7	1406.66
DS1_062	4201.59	2287.04	70315.6	3619.16		3716.53	254.847	55075.2	19880	50252.5	73137.8	13006.3	1299.17	4405	213.656	101.32	557.071	86.1971	2896.55	3766.76	1186.65	47.0934	75.4585	6598.52	68478.3	2342.3	162.348	2651.55	1505	135.043	264.184	6034.38	1925.32	565.575	142638	95407.9	30.6041	413120	209.172	684.34	1729.18	3670.86	635.257	764.279	19200.6	1718.76	1196.1	16737.5	1704.72
DS1_063	5421.09	2841.86	80777.1	2329.6	164.94	4969.65	67.7848	94945.9	5609.7	63276.3	20200.1	21651.2	1603.5	7534.57	265.657	135.156	763.289	230.292	3301.53	3873.44	1088.95	64.4937	593.289	10816.1	49910.1	1175.1	2210.41	5069.72	360.154	68.5346	2120.94	4795.61	1983.34	430.973	85187.5	159579		463844		332.793	2393.69	4462.38	473.286	379.409	13426.3	690.42	1918.43	8409.73	616.889
DS1_064	9118.44	3324.98	109136	2032.88	240.511	3931.52	103.443	89714.3	5984.66	65023.6	25080.6	12742.8	2110.78	4991.59	63.37	18.9302	320.088	338.909	2252.84	4662.15	683.479	6.42564	701.193	15056.1	53929.5	1182.81	2706.45	6795.24	626.472	71.1288	3201.13	4013.34	1459.87	541.104	123754	186863	63.9644	683630	316.226	774.889	2570.03	3478.22	347.367	376.541	16367.2	895.279	2417.09	9618.76	508.69
DS1_065	7294.51	2929.34	97251.9	2631.4	126.191	5544	238.103	73603	12540	62927.6	54007.6	14532.7	1647.09	3761.64	70.9262	199.084	841.135	92.498	1809.15	2881.72	963.199		155.019	8246.78	113697	1766.65	817.905	3094.67	1890.13	174.767	1027.64	7980.38	679.022	863.842	152690	79908.9	52.608	597812	300.449	647.476	2256.33	2835.01	381.033	326.12	21288.9	2284.89	1599.47	16777.1	1919.92
DS1_066	5385.22	3755.58	77362.9	2587.1	117.936	3313.31	133.368	80570.9	10373.7	73673.3	44823.5	17730.7	1757.43	5041.73	45.6757	216.496	362.542	178.148	2531.03	2263.7	959.696	126.977	984.616	10170.5	74400.3	2320.64	4501.17	12530.4	684.965	77.592	5655.25	9572.28	1201.44	529.912	101978	128198	51.48	548576	305.232	709.689	2914.59	3840.01	420.453	490.644	18703.6	867.253	3088.41	9965.47	643.687
DS1_067	4796.98	2891.15	64111.5	3633.16	101.537	3663.55	444.489	85201.3	12698.3	73118.7	60324.3	21352.7	1184.61	4220.44	185.416	212.543	959.55	123.255	2536.11	3754.11	855.787	115.417	453	7308.01	76221.2	1985.32	1305.45	6354.69	1152.54	200.399	1730.99	9861.72	1463.38	491.817	111381	97473.7	29.2946	490832	308.309	465.34	1768.25	5774.89	471.178	663.262	17950.2	1653.63	1641.04	13371.6	1491.49
DS1_068	3710.94	3463.2	107483	6660.26	1446.04	8164.3	246.958	44617.2	32069.5	65565.7	251019	9715.81	1342.99	3343.23	172.442	477.923	899.196	175.972	482.577	8538.09	813.157	160.294	203.22	3105.98	135539	1715.17	356.678	3275.34	3993.05	207.327	784.996	8503.02	606.503	1544.51	250759	31247.8	36.5844	500536	314.813	647.073	1280.16	1126.65	892.027	2081.41	63480.8	3759.08	1736.64	51998.6	2751.19
DS1_069	7644.35	3513.16	94354.4	1704.61	259.671	3692.97		57835.6	8391.34	74286.4	36653.2	12351.7	1600.18	4497.74	105.021	314.553	645.247	213.046	2111.96	3760.38	861.524	157.377	326.35	7824.18	78035.4	1743.55	1960.61	7033.93	671.696	146.634	3011.83	7711.94	1582.56	424.282	114292	87084.6	30.2541	631573	252.234	515.323	2957.28	3890.33	130.852	283.663	15235.3	590.106	2013.72	11464.1	857.461
DS1_070	374.778	385.152	54033.3	4720.18		4771.01	350.006	116181	10860.2	69136.5	83631.8	22341.7	928.334	4942.91	288.415	153.64	712.619	119.408	1745.44	4465.8	935.555	47.6565	177.094	4637.92	85648.2	1240.43	728.602	2724.95	1028.01	148.868	749.41	7430.34	2397.38	562.222	147434	85630.2	31.4381	337842	188.407	183.338	1695.23	4743.38	1484.46	1599.03	38068.3	2407.57	1822.01	29314.3	1673.76
DS1_071	5465.51	2373.04	77765.3	2341.9	16.4811	5900.05	207.069	57176.4	4064.47	53433.1	33158	12017.4	1669.72	4755.86	73.1599	81.9116	489.409	133.274	2745.15	2653.31	707.98	128.869	1012.86	8226.87	83728.1	2958.99	3238.3	13770	643.21	164.724	4003.32	16513.9	1075.94	457.871	79427.9	95932.6		461881	149.914	290.24	1924.92	10948.8	929.866	587.842	20259.5	1222.17	2985.2	13050.7	871.218
DS1_072	5133.08	3371.54	69620.8	2291.78		3152.12	318.666	81636.7	11401.9	70762.2	50236.6	18256.3	1326.24	3525.66	139.083	495.119	439.581	122.571	4642.04	3206.21	1130.58	214.357	759.694	8177.56	74217.1	2817.42	2204.31	9134	1054.27	129.958	3440.03	9031.93	2350.53	474.212	105871	174064	27.1088	416654	245.235	363.262	1785.1	6534.73	571.455	217.975	13908	1014.72	2472.32	9192.83	913.83
DS1_073	8194.96	3801.64	111398	1753.9	373.38	3907	58.5577	95220.1	5205.45	72767.1	19138.7	13443.3	2041.27	5643.75	23.2831	211.896	532.911	92.3394	5766.76	4650.18	821.674	162.63	504.688	13583.6	49508.7	970.316	3272.95	5333.67	521.701	120.168	2726.66	3374.06	1052.72	944.741	116135	171810	63.618	544783	201.731	1045.23	2780.31	3662.48	676.273	342.613	17041.2	1120.7	2517.22	9733.26	548.611
DS1_074	5505.6	8284.67	46511	2716.66	94.4052	3310.58	156.266	110723	10411.6	48323.5	35940.5	19002	1484.29	9952.57	166.89	297.962	468.091	190.301	1969.37	2362.37	1252.65	258.384	1023.88	4564.82	54024.6	1327.76	5148.54	7857.09	473.728	57.0814	3675.14	6237.23	1021.24	1546.19	84828.5	56434.9	33.2033	585409	405.513	386.177	619.573	1435.75	1297.95	1489.63	32124.7	2716.97	2527.71	25392.3	2310.23
DS1_075	6515.52	2843.65	86085.6	1789.45	313.906	8760.47		84034.1	6040.61	83204.7	28356.2	13661	1518.36	5891.23	138.088	50.9799	904.141	32.8422	2142.66	5154.38	1184.26	330.816	1232.03	8289.25	86134.1	3004.55	4067.71	9844.89	1103.88	177.489	4802.41	10346.2	1111.89	744.87	171259	99756.4	27.0924	489303	250.874	665.238	2060.78	2730.29	472.101	448.979	23479.9	1069.99	3129.46	13178.2	977.405
DS1_076	2791.6	1384.17	50858.8	9284.67	137.912	3411.93	1016.95	31127.1	43724.5	37377	371821	4417.86	855.531	5056.38	333.096	351.507	714.112	222.341	230.161	5085.69	607.237	7.0726	909.685	4008.01	113557	5465.34	2991.84	23187.5	4068.84	173.349	6860.45	20826.8	1473.42	876.621	197666	36787.9	25.6402	311786	59.1957	426.254	1163.44	2053.2	1409.39	2119.68	53842.6	4794.06	3781.02	43584.5	3973.83
DS1_077	7131.71	3215.38	96171.5	2693.88	286.075	5125.1	50.0623	48962.9	13154.6	61551.9	48618.2	9692.38	1585.79	5458.64	151.333	184.781	1090.32	149.961	2020.6	3507.61	935.238	198.238	544.492	9184.82	96782.1	2314.49	1290.76	5968.05	1011.18	159.441	1720.55	8166.43	1079.04	615.263	119938	139955	35.3243	556996	449.526	497.125	2144.28	2820.77	656.661	622.339	18861.2	1261.35	2418.67	15149.7	964.188
DS1_078	5712	2124.14	77490.4	5778.86	66.7578	2631.02	520.47	40704.6	26908.9	38363.6	91555.2	6881.26	1022.86	4413.19	223.025	409.502	732.689	77.3113	1241.08	3346.88	1531.31	281.122	376.524	6254.04	113238	1905.92	627.349	3412.46	2403.93	183.3	682.515	8955.97	980.254	614.751	169205	62184.7	33.2216	511246	370.526	303.166	1887.53	2741.61	567.475	765.838	30073.4	3647.84	1940.43	25238.8	3783.52
DS1_079	7446.44	2646.41	91177.3	2372.02	189.935	4996.56	197.314	46844.7	8442.25	64613.1	28466.7	7901.75	1065.1	3870.16	158.51	21.2711	302.68	292.461	2324.73	3465.86	1335.6	0.410521	1289.83	13636.6	90211.5	2821.85	4858.35	13524.6	755.536	217.816	5680.78	9817.13	2020.68	343.092	118652	180663	19.0819	630738	253.828	448.541	3351.32	5336.28	454.896	415.56	22273.8	975.428	4313.18	13382.9	796.093
DS1_080	36066	26793.2	83692.6	3648.8	55.2956	4399.66	484.828	51329.2	13809.9	68535.9	57914.2	11051.4	1774.6	7544.45	398.364	115.027	646.686	77.1734	3775.12	2809.27	1124.45	38.7577	885.348	10508.7	138063	5954.87	8847.29	16092.1	1172.21	149.96	6779.5	11714.3	1916.12	192.257	143472	202851		433255	221.146	495.114	2118.95	6233.22	826.913	581.165	28699.6	1399.12	5457.48	15333	1039.84
DS1_081	6356.86	3860.59	85695.7	2520.02	141.868	4495.69	82.0308	80711.8	8614.12	85207.3	51449	19704.8	1554.67	4400.57	69.3758	352.28	878.334	96.6235	2188.35	3590.91	838.819	347.338	795.855	10511	99068.5	2475.28	2654.84	9660.96	1136.56	170.923	3411.53	13101.7	1962.76	612.407	145237	124904	42.5894	601746	420.244	701.379	3032.41	4019.63	288.54	506.616	17122.5	1109.41	2268.24	10801.4	1014.84
DS1_082	6416.09	4819.88	95492.7	1749.8	162.399	4771.88	116.887	77061.6	4472.49	68562.7	22781.7	16625	1826.64	4700.69	139.337	18.6876	443.482	154.23	4916.23	3624.06	1012.47	270.426	1003.83	11307	59143.8	1195.08	3710.52	8240.94	426.417	77.658	5276.4	4738.31	1518.33	658.259	106114	167973	50.5539	464721	186.783	781.268	2696.7	4990.1	610.776	646.834	17889.5	699.93	2886.36	11116.9	410.816
DS1_083	1719.66	365.787	59906.9	6908.85	26.3169	5412.14	287.997	151132	27133	93085.1	162042	27517.2	973.661	3385.69	260.565	252.775	674.766	128.306	1231.7	2642.99	842.439	55.1	163.841	6677.62	135601	2201.94	457.464	3237.35	3037.52	139.38	854.557	10213.8	1352.26	560.011	172006	73717.4	46.1197	360143	359.596	405.174	1831.08	3916.93	485.839	579.133	25114.2	2497.15	1023.16	23289.3	2302.32
DS1_084	6561.1	1980.31	89184.1	2329.27	339.889	4037.14	26.6366	44099.4	7777.46	55971.2	40568.9	8016.46	1799.94	4475.62	33.6388	202.037	386.338	137.781	1828.77	3465.4	589.162	102.234	462.569	9035.5	81323.2	1079.3	1320.21	4859.02	1794.36	92.488	1364.24	7878.06	1201.78	646.262	127359	65947.7	31.9743	500215	347.961	731.26	1795.81	1545.33	358.179	454.392	29312.5	2186.26	1462.15	20492.4	1883.25
DS1_085	8541.32	1929.96	92854.5	4762.77	459.828	4511.76	230.401	77333.6	27375.9	73529.7	112107	17438.3	1352.07	4017.86	91.8554	79.4037	472.472	157.159	913.724	4039.37	927.734	67.5505	895.679	11416.2	76252.4	1719.66	4581.24	10319	1004.81	126.598	5005.17	7617.15	988.702	683.147	89232.8	120216	31.2312	545229	397.022	349.891	1853.73	3467.19	267.862	1048.3	18874.9	948.24	3569.84	9640.51	551.027
DS1_086	7100.89	2605.16	90917.4	4198.45	372.118	5853.62	357.103	99044.1	13330.5	68783.8	63631.5	19862.6	1610.25	4634.19	129.241	100.339	526.002	106.126	1642.74	4676.6	958.919	228.266	224.632	9248.7	77920.5	756.172	546.442	2391.38	1471.14	144.953	669.213	4429.13	721.87	869.531	153264	103260	22.6432	580113	195.032	691.622	2101.22	3617.45	511.231	386.867	17440.3	1454.34	1135.39	14626.3	1047.21
DS1_087	4385.19	2087.29	59690.3	2473.71	252.592	4349.58	108.979	60959.4	9883.18	47267.6	31088.7	14834.4	1232.73	11705.9	149.239	261.695	678.946	67.0722	2387.48	3571.87	1691	12.9398	398.923	6669.97	75795.2	1825.67	1565.34	6096.49	783.887	244.361	1548.83	6409.26	2257.68	784.821	109965	87277.9	31.8344	385648	238.247	188.204	1927.32	3576.69	2237.62	2230.82	52092.9	6823.27	3932.5	39493	4976.37
DS1_088	2574.42	423.05	78168	2694.12		5277.73	105.041	127561	10416.7	85979.4	54501.7	23698.9	1567.99	4207.99	175.908	239.679	658.728	118.534	3385.27	4234.66	1341.61	65.4347	136.324	8578.79	96269.4	1527.53	445.961	2821.02	1199.16	116.895	677.839	10011.1	2388.39	643.396	153291	176635	48.3802	399915	365.745	507.373	2360.4	5875.32	1219.64	844.326	23282.8	1991.52	1657.14	19250.6	1462.38
DS1_089	8236.95	2961.59	93149.3	2178.3	16.1604	5239.61	68.6998	105182	6184.76	85990.7	40358.6	19259.4	1352.25	5479.3	78.093	5.07704	723.127	289.013	3075.96	4351.94	817.135	212.101	1157.74	11843	66768	2057	3934.09	11210.7	560.142	77.6423	4796.04	8914.56	1390.33	730.714	110433	185125	59.5572	597619	446.479	265.64	2195.21	3820.56	839.053	912.827	24299.5	1639.6	3711.11	15910.1	1094.11
DS1_090	11387.6	4662.91	98672.1	2118.12	99.254	2784.01	117.779	51388.6	6503.16	55455.8	24292.5	9314.71	2188.65	6319.43	219.507	646.949	668.755	439.9	3581.42	4564.59	845.703	446.746	643.875	10738.9	51611.8	1109.25	3576.11	4101.85	192.697	50.7807	2863.79	3154.88	1384.41	508.736	114734	168041	51.9771	733471	214.538	826.69	2375.27	3418.05	935.948	688.893	23114	656.19	2292.11	14103.5	615.753
DS1_091	6045.28	2054.38	105504	1587.44	328.778	2363.67	898.062	54021.4	5022.84	88796.8	20502	8134.72	1545.68	4121.95	195.801	250.944	1295.05	114.625	5015.55	4500.02	513.379	180.759	394.311	12681.1	89560.1	2396.64	2090.21	5287.84	780.767	143.378	2698.73	6716.3	1440.9	560.219	143398	258202	40.515	730612	266.873	1377.64	2217.72	2573.63	393.779	821.541	24935.2	1033.39	1976.05	16572.7	672.04
DS1_092	5459.83	2239.19	68440.1	3459.68	270.047	5805.61	87.5223	84817.4	11566.5	77386.8	50226.1	14295.9	1423.39	4398.7	45.0324	182.626	461.078	48.1	1243.38	3687.25	611.938	122.216	967.842	7718.65	92308.7	2603.6	3974.15	7947.84	1598.69	178.141	3509.29	9135.79	776.829	959.121	165399	62788.5	33.2804	463500	273.039	517.56	1512.16	2357.25	483.324	439.487	26570.1	1474.31	3196.67	16892.1	1720.01
DS1_093	4269.25	1187.53	110393	2921.69	115.599	5174.94	238.247	94391.1	15010.6	109616	80073.4	17416.8	1765.81	4810.2	20.8717	193.839	850.837	132.695	1956.17	2791.46	604.875	200.059	195.853	12861.2	119252	2348.74	770.668	4376.33	1641.9	166.082	1238.47	12208.6	1132.96	397.821	169859	167918	19.7854	663662	157.71	453.112	2958.26	3436.41	539.151	481.855	19082.4	862.589	1753.19	14551.8	437.305
DS1_094	5679.53	1886.85	123206	12401.1	1467.64	13854.8	1280.79	20983.6	88530.9	37179.2	447197	3363.86	1196.48	3581.79	285.797	279.606	1335.52	243.607	130.416	12059.6	1013.94	507.668	244.691	1886.31	79119.1	1025.76	336.689	2827.31	3125.7	165.914	449.552	6883.99	741.766	1869.06	337105	15690.2	45.0771	605350	250.774	585.855	1775.51	1730.87	1389.82	4880.79	87275	2729.18	2775.51	70671.5	1976.81
DS1_095	7054.38	2704.75	93715.7	3678.79	294.019	4212.95	400.549	45610.2	15459.2	54788.9	67295.1	8399.72	1500.14	4152.84	556.342	610.822	793.451	272.885	4936.34	5293.14	1181.77	0.0440908	1023.23	9044.87	60280.5	1821.67	4902.3	9721.17	654.837	67.0886	6085.56	5433.49	2160.52	324.158	114952	198422	42.7814	629460	85.7755	354.1	2672.72	4801.21	1062.44	671.121	22671.1	1160.81	3409.01	14680	849.34
DS1_096	6115.93	3471.76	81347.7	2663.99	103.71	4097.27	300.533	66876.1	12300.6	67388	43993.3	13536.2	1590.75	4688.58	386.764	219.817	528.218	409.539	2535.55	3833.12	1014.17	78.1648	639.139	8744.03	74869.3	1882.18	1966.74	6623.16	674.704	172.033	1534.87	6406.56	1547.31	562.519	118596	140368	45.1322	558210	320.13	515.54	2464.2	4602.74	542.153	354.801	17142.5	755.337	2098.92	12794.4	729.524
DS1_097	4413.06	3490.33	103284	11222.8	986.267	7154.31	1575.65	1176.26	88784	43812.3	685449		1197.88	3836.89	398.142	657.974	1261.51	306.338	0.0606334	3043.29	475.605	286.965	927.157	87.7457	195830	3833.33	2309.33	14412.9	6293.15	467.888	4083.03	21580.2	1053.45	1284.98	480263	17819.8	39.1848	968084		975.935	651.288	379.136	2030.17	4440.87	127191	6131.84	5143.61	99660.4	4563.1
DS1_098	5548.22	3358.43	88372.2	3777.74	319.699	5748.91	318.545	65012.9	15868.2	75163.9	101691	9442.71	1427.3	5095.04	138.946	347.309	475.456	77.2599	845.392	4140.79	782.175	385.045	494.986	3969.65	117495	2227.34	1810.56	10393.5	2501.84	164.061	3093.29	16202.9	982.255	995.922	197414	56683.7	40.7806	460591	371.857	449.29	1758.06	2025.85	919.269	2251	47595.8	2931.15	2621.92	34317.5	2175.2
DS1_099	9275.72	3822.78	106443	2019.96	285.746	3718.32	121.977	32258.8	9129.58	42800.3	32806.5	4364.42	2292.2	6582.68	430.238	375.398	886.305	264.979	4530.88	5413.2	882.947		761.763	10942.7	50450.9	1082.12	3696.92	8399.51	378.841	65.8451	4934.07	4184.67	1695.34	242.124	110138	268187	79.4515	788662	260.431	584.264	2859.61	3256.2	1243.08	730.984	22801.6	994.5	3329.22	13188.1	533.209
DS1_100	2313.15	2125.72	81293.3	15826.2	788.807	6419.11	924.109	4034.24	173423	37135.5	1.17108e+06	542.871	1449.71	3112.74	551.438	583.494	1043.82	272.906	56.4506	2132.17	736.194	155.185	1621.32	529.089	173281	7599.95	7818.23	38354.1	6073.72	326	13511.7	23456.7	783.283	932.724	422211	21064.9	71.0883	865677	86.7596	291.84	1427.32	910.645	3281.55	4034.78	127931	6699.94	9711.75	98055.6	6309.38
DS1_101	5761.4	2445.6	74412.1	7008.8	214.355	1875.77	789.439	61676.5	23486.7	47839.4	65752.3	6612.5	1467.84	6519.98	288.789	296.231	915.63	179.109	2503.71	12643.7	967.943		169.695	8410.13	53011.1	1357.67	602.199	2317.87	1242.04	66.1094	758.414	2823.97	1344.13	333.224	119552	142127	36.124	617906	242.209	391.759	2592.86	4943.88	4011.53	787.674	25200	2059.82	3030.92	19074.3	1749.13
DS1_102	7414.53	4568.2	95446.7	3396.9	127.218	3540.3	198.076	34911.1	10357.6	66633	45114.2	7013.88	2180.43	10537.6	36.3819	320.019	141.04	52.0188	27.3022	3521.76	696.382	362.097	557.287	11703	83831	1473.38	1762.99	9263.11	782.738	77.7338	3008.76	8660.14	587.046	500.214	47873.7	6451.55	64.0502	605038	439.216	480.197	162.914	67.2467	4200.97	6778.73	107317	19831.1	4892.51	81197.2	14021.6
DS1_103	6007.51	2895.96	93627.9	3127.7	167.778	4009.62	90.7266	61545.6	9102.08	64493.6	50647.4	15280	1562.35	6408.84	33.5116	227.207	634.848	362.133	4271.81	2409.51	889.506	183.971	663.326	13699.8	76717	2331.23	3742.88	9476.89	1158.16	101.078	3664.79	7666.48	1320.37	470.936	108328	162815		544811	79.433	359.711	3202.62	4557.16	503.982	738.143	23088.1	1363.59	2514.06	15155.6	1261.73
DS1_104	5863.11	3620.24	80209.4	2650.64	402.472	5450.13	70.7409	86268.6	4967.2	63962.3	42749.7	17156.6	1600.06	5349.81	98.2815	364.628	761.157	350.223	1907.47	4493.18	1391.47	353.142	160.733	7686.67	71890.4	1313.5	231.096	3088.94	1209.37	120.852	162.83	13943.9	2956.43	850.243	140859	102279	45.2665	499786	354.069	752.932	2055.01	3044.71	657.159	938.703	22068.1	1221.48	1822.6	16932.5	963.017
DS1_105	6364.97	915.069	101316	4044.12	680.943	6108.26	280.007	62490.5	26665.4	63855.4	162071	10180.7	1695.48	4024.16	111.025	214.224	746.817	25.513	1279.49	5026.95	530.915	107.475	86.2283	5471.28	119922	1109.41	321.133	3177.57	3046.31	184.546	635.978	5835.36	1165.23	1409.91	218584	85776.6	23.7534	590767	155.894	424.514	2527.94	2765.65	930.885	1272.86	50096	4050.13	1564.56	41299.5	2838.25
DS1_106	4777.71	2580.43	78812.2	1436.57	188.115	3552.23	42.5211	76637.4	4895.1	77626	30307.2	14050.1	1512.43	5176.23	83.442	208.017	496.468	258.259	2546.89	4833.08	881.005	182.212	1345.66	8659.1	93245.2	4937.15	4742.04	25831.6	969.389	122.338	9985.46	21025.3	1372.22	595.52	136821	128772	28.7316	483195	268.25	347.319	2126.4	2590.44	642.486	1170.31	26357.3	1224.42	5185.02	15650.7	1007.58
DS1_107	7149.06	3258.78	119086	2428.54	277.774	5553.09	239.405	70881.9	8122.74	83163.5	32101.4	12340.2	1889.57	6294.68	54.5961	30.6654	461.856	48.8296	5789.37	4021.59	466.766	112.499	887.199	12111.8	80105	2866.18	5416.46	10807.5	1299.04	96.7185	7920.78	6814.73	767.253	478.97	123639	220968	47.8654	660117	229.471	938.869	3174.95	4259.68	756.6	185.837	19800.6	1478.9	3864.37	9661.98	1094.08
DS1_108	8728.9	1997.35	77505.3	5081.36	275.179	2260.94	486.752	43446.5	24592.8	58564.2	123829	12462.2	1635.56	4103.66	217.076	427.707	1150.65	160.875	684.024	6448.2	627.275	87.88	418.216	4458.42	109342	1550.52	924.794	6442.05	2291.72	159.109	1146.88	11167.4	632.014	804.933	135614	49956.9	41.4352	604806	267.211	755.025	1150.54	1843.05	617.629	2157.66	47455	3444.94	2292.29	34044.3	2710.96
DS1_109	6230.58	2661.03	102407	3335.76	201.99	6518.13	148.769	64926	15511.2	71027.3	107657	17572.5	1056.75	5580.72	107.918	290.94	667.879	170.136	1278.74	2387.86	870.706	242.386	374.32	8371.84	81810.4	1376.11	978.619	4346.08	1250.9	132.933	1448.1	7306.89	1798.06	680.397	171407	106163	45.4991	595485	370.356	399.043	2400.97	3724.26	566.464	1106.11	29667.2	1730.57	2085.44	21704	1471.35
DS1_110	6261.7	1322	94126.6	8018.35	1264.2	5588.15	867.241	20309.5	38364.5	40747.7	316605	3581.41	1448.9	3365.84	310.462	484.306	926.009	250.748	247.071	5867.84	596.257	2.06801	229.384	3840.24	105985	2064.16	720.488	3395.01	3888.03	157.441	943.723	8897.66	1167.32	1117.56	273045	21812.3	59.4351	534170	166.462	732.231	1192.79	859.018	882.107	4946.27	76505.6	4582.46	2215.68	60916.7	4123.34
DS1_111	11501.3	5645.47	119734	1594.38	286.422	2643.04	19.0143	25903.7	5877.33	41615.7	17228.1	4583.45	2169.66	4818.99	125.738	317.217	721.831		3118.58	3572.23	735.697	238.728	397.687	13725.5	67373.5	1232.17	1723.65	6496.51	707.475	77.5335	1936.16	6779.86	1138.78	478.163	88903.5	161493	73.4199	853522	375.52	1075.53	3026.44	3994.35	534.128	431.689	17185.4	857.824	2378.96	10440.8	575.1
DS1_112	4034.63	2672.36	104465	1332.82	245.788	4779.98	27.1814	117903	5614.55	124665	23865.1	23481.5	1847.25	4030.77	156.465	201.82	692.168	273.823	3152.66	2704.95	502.175	157.364	754.283	11919.1	91347	2670.8	4053.66	8460.47	716.738	220.913	4175.4	7704.76	1146.36	847.969	115053	175079	28.8973	685620	94.8968	633.504	2549.97	3383.44	179.399	380.674	14637.7	796.186	2354.35	7399.86	606.645
DS1_113	4106.12	1741.56	77688.9	10647.5	645.835	5575.72	1665.32	42831.3	51099	48695.8	305901	7749.77	707.596	2813.83	357.072	304.346	1216.7	110.19	209.252	8185.8	691.949	143.663	341.593	4425.86	89800.6	2877.22	1253.66	9025.53	4206.48	160.572	2370.14	8675.5	1345.26	1063.7	266215	21703.1	59.1415	437852	291.839	556.812	1398.28	1523.01	655.787	1759.94	41685.7	1904.45	2577.95	35188.1	1699.96
DS1_114	5234.5	2953.42	76893.5	2290.63	112.775	2202.36	169.172	61587.4	9124.11	56466.6	41911.2	11601.9	1487.65	5145.37	800.099	294.831	972.706	375.312	3861.28	4801.45	1001.98	304.189	804.842	9068.07	67717.5	1979.52	4059.69	10492.1	388.428	62.7047	4972.79	7280.45	2108.26	579.049	106404	172563	32.098	536985	207.741	263.175	2701.73	3635.34	758.664	477.646	16603.7	925.484	3237.39	9294.43	554.435
DS1_115	6613.77	3509.81	79788.6	3430.24	78.8891	5808.29	289.01	79715.8	8390.57	64931.8	51911.1	18146.5	1658.41	4349.77	272.482	188.027	595.807	113.914	4318.87	3988.28	1222.75	120.735	228.065	8218.03	51250.3	1502.81	1075.01	6649.24	740.589	67.0604	2120.2	5497.3	1596.71	487.16	123583	163397	57.1373	442144	312.448	540.168	2458.33	6472.32	677.423	392.293	15900.2	910.836	2357.29	11085.6	619.313
DS1_116	4010.17	582.779	77521.6	2956.21	58.569	6914.66	107.593	61493.9	11296.1	68340.9	83288.6	17332.2	1176.82	4271.7	120.21	194.107	558.994	155.261	3078.23	3954.88	1560.99	93.7552	380.971	6794.34	84435.9	1925.36	1667.22	7921.3	1040.08	143.655	2515.38	7001.73	1648.65	577.195	127273	126811	49.1058	443735	162.548	352.593	2445.43	5850.51	862.94	400.035	20322.2	1906.66	2698.33	14467	1342.72
DS1_117	4291.95	1767.42	46307.8	5488.11	41.5517	1354.7	771.953	98677.9	34450.6	86186.2	235886	24057.1	785.161	2736.69	242.507	232.975	1026.72	84.3507	576.454	2889.91	436.012	239.103	3022.98	5543.28	182533	9286.03	12569.2	100540	3900.56	268.699	28632.7	77422.2	2408.9	472.664	140648	38470.2	43.1491	308518	254.595	269.144	1798.4	3386.2	331.969	583.475	37975.1	3187.24	9951.14	21363.4	2943.2
DS1_118	5506.44	3128.69	90174.7	2260.63	99.3748	4585.35		47725.4	19974.4	75292.1	82132.2	10672.9	1526.73	3932.92	136.49	293.546	498.496	98.5381	1277.99	4259.35	896.064	125.72	336.397	5614.09	128704	3128.3	1058.01	7340.54	1812.15	330.235	1938.89	14133	1098.09	522.952	177143	70924.2	34.1117	612770	353.313	354.827	2468.65	3753.25	462.12	630.12	25946.5	2322.39	1630.17	23759	1692.94
DS1_119	7751.18	4021.18	98770.8	2710.11	365.702	3004.58		100020	3628.27	78633.1	24926.8	11031.6	1821.6	7271.35	64.6231	121.379	627.426	312.477	2378.64	5040.21	591.562	220.448	313.267	12802.7	47563.2	1135.82	1241.25	3736.35	656.853	87.2232	1222.25	4531.88	1035.79	820.893	99803.9	123723	106.551	684053	380.629	170.169	2130.02	1647.82	570.556	450.458	15159.2	972.319	1580.25	10333.2	814.007
DS1_120	4282.05	2110.16	88741.8	5505.72	618.102	7272.58	770.675	7697.14	35478.9	26365.4	298749	1919.43	1583.53	4090.84	288.774	906.698	1415.94	177.299	36.8258	7412.68	640.029		630.204	906.429	97059.4	1321.81	989.918	7582.11	2968.26	298.944	1810.08	15960.7	527.93	1669.67	275074	11636.3	56.7975	380201	104.62	614.349	870.56	569.59	1292.84	7819.09	108789	3419.07	3612.6	78316.8	2907.7
DS1_121	5693.72	2613.28	89603.3	2142.09	478.068	4628.8	208.175	67955.3	11014	75879.4	56635.3	14040.1	2004.48	4655.93	104.544	250.914	866.109	146.262	1330.16	3576.78	778.209	105.736	462.145	7026.85	79633.7	2402.63	867.5	6038.93	2407.32	249.215	2112.37	9047.66	1361.18	502.62	172687	89722.3	37.6648	519574	324.859	698.157	1889.67	3030.31	335.22	262.18	16985.7	1614.87	1967.15	14259.6	1439.01
DS1_122	6608.16	2925.15	99329	2536.45	421.802	6923.21	99.2653	100470	8548.13	63542.4	39759	20631.3	1778.6	5845.35	81.5821	323.961	699.594	373.182	5440.86	3777.37	1032.37		933.719	12816.7	48569.9	1050.08	2924.12	6099.67	384.654	88.7049	3802.42	4216.04	1794.7	1012.34	101978	221016	43.4806	577266	221.685	851.729	2930.27	3762.89	469.13	391.146	14614.6	867.183	2572.61	8021.61	395.12
DS1_123	4954.85	2105.75	66790	7145.85		2321.52	617.593	53368.9	20577.4	53341.9	60029.8	12269.7	1808.72	5827.76	186.721	189.238	517.127	107.621	3420.44	2921.59	911.029	124.021	3254.39	5923	112134	7941.98	9111.18	49552.3	1510.25	155.29	17776.7	26237.2	2027.72	517.369	142147	123078	36.9488	479224	210.923	757.444	1431.09	3136.6	868.72	1065.96	32576.5	1934.89	7886.82	17536.8	1697.15
DS1_124	6020.85	3813.35	86342.6	4170.45	125.716	4976.51	478.594	79686.9	16208.3	80300.4	74030.1	20276.3	1797.26	4338.49	124.898	271.643	662.214	211.667	1720.7	2421.27	904.16	197.807	158.11	6711.12	83138.9	1197.19	387.113	1978.52	2145.89	156.608	418.967	8439.06	911.199	561.909	137749	103467	36.9979	622061	388.039	511.698	2364.43	3777.67	509.932	939.913	17492.4	2000.8	913.119	13481.3	1582.15
DS1_125	7212.41	3194.21	105048	3168.96	238.72	4683.49	252.543	41273.5	16444.2	55143.3	66993.7	8156.12	1976.85	5790.43	343.027	21.2705	736.033	141.811	3924.89	3814.52	915.102		353.154	12338.6	60514.5	859.251	1232.23	4975.11	820.48	107.746	1483.87	4482.78	2272.3	347.578	123843	174221	51.4305	704383	201.443	725.902	3855.24	4010.79	686.541	568.215	17483.8	1010.17	1631.32	11791.9	758.845
DS1_126	5919.29	4318.46	83927.9	2763.18	164.582	2627.85	189.057	30617.2	25662.2	51830.8	74416.4	3908.57	1706.88	10389.1	169.528	529.923	440.627	52.6498	672.912	3313.51	969.336		395.628	6013.55	86684	1962.4	1051.57	6536.52	1382.22	110.225	1920.66	8165.65	825.455	306.668	119412	52560.5	39.633	617262	483.501	352.533	1584.96	2028.87	881.025	1913.2	42382.8	3290.49	2382.89	30226.6	2635.08
DS1_127	6329.44	4284.61	92308.9	6549.85	537.894	3755.58	1135.05	3668.47	107270	20925.6	443357	309.441	1376.15	3376.61	734.836	342.621	1331.7	37.6248	309.31	3490.45	486.085	33.8121	788.859	1926.25	147552	6723.28	1545.33	8806.05	4139.49	293.333	2805.28	14296.1	636.203	861.198	328899	32241.6	50.8368	622814	192.502	322.313	907.241	599.296	1204.12	2007.24	51401.9	5431.27	2342.19	45539.8	4763.68
DS1_128	10272.1	4572.23	117592	1549.52	365.377	3295.8	32.9563	42232.2	7147.36	55924	27361.9	11425.2	2090.05	5473.81	20.1998	189.224	1072.84	382.622	3499.13	3225.64	1665.42	334.84	405.45	12405	63728.8	1442.67	1830	5625.62	383.827	79.6203	2111.87	6982.61	1667.4	746.88	94983.8	189737	27.4032	763834	351.969	765.159	2669.1	2034.93	415.686	431.293	17018.1	1126.9	1709.65	9999.67	843.668
DS1_129	5335.09	2564.44	94950.9	6547.12	1370.34	4901.6	631.716	27229.9	29552.8	46245.9	232145	4705.49	1341.83	3567.94	356.943	714.14	1524.12	143.556	420.056	7224.12	609.77	145.765	204.125	5203.58	96158.9	2131.31	997.045	5122.88	3803.64	151.352	1136.02	10140.8	798.501	1040.67	276291	30435.6	40.673	552903	184.3	465.236	1168.44	793.188	1823.11	6235.79	87564.3	4750.13	2782.25	74221.2	4008.53
DS1_130	4600.71	2830.65	87455.7	3983.77	941.271	5123.29	339.974	40600.1	22006	51423	137933	8291.35	1444.22	3820.48	153.432	785.767	823.735	151.591	557.763	7362.65	775.1	489.992	352.938	4248.35	121173	2379.07	944.945	7555.61	2613.35	203.86	1547.45	14556.3	1047.17	1294.15	219784	41732	22.815	432890	221.206	518.704	1341.8	1412.16	949.661	3571.24	59605.1	3415.73	2383.97	47718.4	2845.09
DS1_131	10767.6	7901.07	99566.1	1627.42	238.321	4787.82		13489.4	3259.7	22396	7609.83	3015.65	2920.27	8305.48	24.0602	870.769	128.664	118.879	145.385	6012.96	1603.93	938.059	649.216	19371.2	24340	165.258	1991.11	4244.43	51.6189	17.979	2782.88	1982.52	161.302	308.058	34596	13167.8	84.8651	687566	84.5418	2975.26	4528.12	4761.92	64.4568	361	10092.3	107.418	1937.04	5664.53	42.1862
DS1_132	8666.63	3959.39	88648.8	3042.49	398.529	6802.64		32242.6		19966.3	1400	5723.69	3065.98	8001.24		543.736	128.152	610.179	301.699	5445.02	1712.04	863.186		18367.7	1324.53				116.512				381.531	1001.14	14377.6	23839.5	167.611	537268	252.666	2092.39	3504.85	3545.05		241.767	3499.25			2800.13
DS1_133	6790.11	4395.12	100902	7578.32	237.551	4136.34	262.074	48639.4	2751.66	56468.9	7013.44	9811.07	1905.52	5817.61	165.867	262.381	235.758	416.64	2694.7	5805.19	997.634	284.656	34.238	20299.6	7022.28	204.534	755.111	292.825		28.2053	67.1737		3030.84	1006.59	21300.6	113641		495077	112.131	740.56	2633.09	2593.26	1393.23	683.063	10784.3	329.688	533.926	8379.78	170.193
DS1_134	7019.18	6206.55	66913	1591.5	321.908	1768.86		16663.1	100.118	10896.8	998.514	5425.01	2548.33	5498.73	35.4215	254.596	201.049	524.732	1019.86	7111.36	3138.81	289.942		21512.2	820.062	49.3863							396.246	442.492	16810.8	10230.3		626741		3564.28	1988.49	2242.48		122.321	2344.18			1955.66	333.54
DS1_135	6939.9	3235.82	74439.2	3626.65	185.208	5220.01		18550.5		13409.6	1232.48	2530.04	2041.5	7442.31	25.3895		41.2875	522.052	133.725	6018.01	2891.29	626.519		11836.1	1409.84	35.186	76.3064			72.7555		15.992	557.488	703.406	15577.6	13970.1	90.6456	427506	165.84	2402.96	2868.88	3254.24	83.5138	140.129	3936.79	47.6444	58.4901	2910.51
DS1_136	11098.4	2750.82	99220.6	5093.48	43.1562	6097.2	135.308	14769.5	117.174	18831.8	2073.65	2136.02	2481.39	8167.25	151.784	307.657	69.5353	362.41	1418.32	5204.03	985.042	154.325		20162.1	1590.34	48.4419				50.1899			549.358	475.321	21066.5	83326.5	77.4649	521869		1530.97	3229.11	3592	478.68	393.61	6143.42	82.3449	173.769	4050.51	12.394
DS1_137	74839.5	65995.8	99517.1	1453.62	318.27	5820.89		5107.68	145.312	7735.47	1245.99	1316.97	2595.14	5860.63	81.9426	179.42	118.243		677.833	5506.24	1833.64	242.562		26678.1	3448.22	115.111	98.3562				56.3679		204.405	269.083	45172.4	21996	51.2792	620814	161.984	5312.55	2419.35	2395.09	200.326	354.571	7842.3	95.821	75.1929	5908.72	228.247
DS1_138	54542.7	45129.5	80533.6	2886.54	143.77	4843.09		26611.2		22599.8	2778.74	12089.8	2006.15	6213.31	403.238	91.6024	154.002	220.704	535.278	6313.15	2261.44	160.283		19434.9	2452.07		134.447	50.3411	49.7537	1.73583		21.767	1091.9	673.876	47650.3	24679.3		515223		2206.86	2141.59	2728.74	377.507	479.885	11508.2	52.0057	216.226	7550.17	159.836
DS1_139	5105.31	2169.83	76576.3	57942.5		10891.8	6404.63	13267.1	127274	28327.5	136343	2507.6	1492.98	4334.31	362.328	173.352	763.419	280.224	414.303	7159.95	1022.27		136.021	8085.15	44305.6	4501.43	1136.52	874.703	2214.83	57.9983	111.958	446.046	713.084	727.15	113234	30756.5	11.9936	465609	74.3845	899.044	2737.95	5083.82	1592.95	1458.77	33824.2	3303.11	1254.57	26754.4	2607.86
DS1_140	667.994	3412.04	64265.4	1782.05	509.937	7837.32		31045.2	868.478	13712.5	1206.73	10461.2	2158.13	7437.48	544.66	244.019	790.884	498.928	329.471	12035.7	1166.03	188.421		9194.44	7463.44		88.1818	122.365	181.111	5.18975			2089.86	603.483	88682.5	12181.8	51.7139	384107		3151.78	1553.27	2615.41	870.898	830.261	13495.4	316.359	416.325	10900.9	379.313
DS1_141	6268.59	3105.9	94982	36550.7	198.364	8202.35	3348.78	22912.3	51044.4	30012.9	40668.2	4764.87	1746.93	7519.12	315.952	210.42	604.319	90.7874	467.75	10334.3	1381.97	277.736	199.757	11900	30018.3	1957.71	4044.84	2048.44	1774.15	11.0387	728.106	66.7995	776.712	1112.77	72168.4	35926.8	82.1602	468524	81.1819	972.716	2646.72	3000.52	1288.13	1071.66	33310.8	2520.87	1208.98	23616.4	2079.19
DS1_142	9592.78	10972	98970.1	1735.3	845.987	5308.88	64.3011	8764.16	261.968	11924.5	1388.43	3579.99	2985.31	7120.05	279.214	250.47	238.141	696.166	176.032	9447.46	789.373	382.535		22324.6	2887.8			85.3223					775.417	251.837	44921.1	13346.6	52.5328	656991		4201.93	2514.92	2158.63	634.329	631.465	15628.2	235.161	128.387	11392.8	257.781
DS1_143	9309.4	5130.49	96213.9	1748.25	300.187	3584.53		4501.56	263.48	6515.91	1376.39	1445.79	3179.78	5849.08	22.2553	403.416	129.628	720.757	61.5932	2326.76	860.861	469.579		14264.1	1128.22	180.984							119.684	132.833	17361	17423.6	124.339	921843	112.749	4035.45	2808.13	2877.43			1587.26			1714.06
DS1_144	8984.71	5350.44	80553.9	2819.97	199.819	6955.83		27320.4	26.8739	19342.2	1061.45	4199.4	2408.86	7531.97		374.348	2.49988	460.721	118.099	5558.22	2445.43	540.154		14411.7	838.665								221.829	780.011	10545.5	16724.3	88.8132	490586	100.592	2617.79	3276.21	4563.73	38.9647	206.188	5582.13	40.0304	63.2422	4302.15
DS1_145	7355.84	3474.24	80321.4	2600.87	164.755	6537.48		15162.9		13561	1166.21	3796.11	2026.01	5302.69	213.249	528.422	157.538	220.122	368.77	4807.45	2007.82	727.116		13808.5	3010.46	36.3819	116.773		66.2705				786.863	451.739	33229.8	22266.3	150.37	540183	194.217	2132.02	3386	4290.01	201.901	221.092	5862.31	71.7048	58.0676	4386.91	4.92694
DS1_146	11117.3	5303.16	115754	1350.8	243.341	4888.61		10600.2		12463.7	1062.33	3215.01	2452.53	6155.74	52.6241	293.345	122.092	655.645	243.481	6669.25	1122.37	595.914		17460.2	2567.66								1336.14	378.187	31886.1	28781.6	84.4842	726543	53.4748	3274.98	2655.79	2015.77	49.0355	94.2694	2416.22			1931.61	58.7701
DS1_147	8610.66	7819.04	67413.3	2129.79	223.54	2740.84		15848.6		14587.4	728.668	2738.64	2287.19	7862.83	381.004	104.439	205.923	607.411	222.856	8297.46	2434.44	230.652		11198.6	2970.75	146.502					41.4195		286.633	359.054	34031.7	9376.11	131.47	576066	161.349	2619.96	3605.73	7436.81	134.496	320.031	6109.04			4590.6	435.914
DS1_148	8465.33	3657.8	92504	3412.46	529.409	4452.91	92.5739	20480.5	302.261	18480.7	1551.31	4656.69	2481.42	9048.29	31.6821	615.791	51.8786	604.306	552.235	5890.48	2508.13			15082.1	466.113				35.389				788.27	597.803	14741.4	39128.7	58.6926	558427		2211.1	3577.49	3955.7	61.1356	249.795	5015.74			3631.58
DS1_149	7786.11	3856.62	93897.5	2655.2	286.102	4491.61		12252.2		13579.4	1190.46	1565.73	2848.63	6518.79	365.758	276.301	337.746	521.577	239.32	11738.4	1626.86	345.252		17975.5	3022.12	13.6892							1327.77	361.507	63894.4	39464	60.9527	588049	234.748	3021.05	2559.18	3038.42	906.86	1113.9	18977.2	175.193	419.154	16713.1	330.253
DS1_150	9533.52	5758.59	92440.3	3218.67	182.568	5775.24		16863.2		15436.6	1546.78	4294.97	2424.04	6819.8	40.8933	477.674	45.6748	320.924	512.996	4902.93	1219.81	735.606		14079.5	621.229								149.665	524.932	20541.6	34506.2	85.0636	600825	100.906	3440.73	3463.63	4269.65			1809.26			1281.78	97.5722
DS1_151	7467.17	3535.21	79943.6	3568.64	320.489	6594.06		7744.02	72.6228	6693.38	1285.81	2264.85	2182.98	7177.37	152.325	263.264	224.633	191.613	347.617	7247.49	1766.3	384.019		8878.61	891.303								558.009	770.748	43959.4	27002.6	88.0734	488494	87.4238	2716.45	2160.64	2798.57	75.3821	165.619	4638.9		59.8656	3515.97	237.816
DS1_152	5930.48	3026.48	70079	10119	32.5301	10880.6	545.004	18221.9	1966.91	13241.8	3681.6	4715.34	1883.97	5918.53	138.563	164.909	143.061	289.569	1373.37	5801.12	1641.73	164.524		9628.33	1398.65	12.876	190.977	42.0267	32.0773	0.0995661			1332.84	692.006	29683.9	46807.4		408522		1365.24	3428.57	6437.61	497.394	237.835	5430.32	32.9076	40.2923	3430.01	95.0189
DS1_153	16112.5	10072.8	115761	1345.96	217.953	1519.74		1855.86	314.376	3004.17	1157.23		3864.68	9105.04	101.116	1469.66	162.061	1197.29	485.991	4355.58	685.082	2442.37		15079.2	1063.12							100.2	1201.12		25708.3	32017.8	228.253	1.3835e+06		1829.27	2956.48	1391.22	195.162	487.132	9328.91			7593.83
DS1_154	8124.09	3659.57	91028.3	3597.56	210.677	5195.58	188.658	12345	1343.21	18671.7	2118.01	1938.34	2406.9	7242.2	131.171	559.176	226.457	431.18	1200.08	7130.74	1165.69	737.237		13856.1	2177.78		390.726		31.3007				945.934	502.375	44768	59068.9	126.745	533269	145.237	1962.26	3313.43	3475.73	461.25	86.7906	6816.45	61.6299		4742.08
DS1_155	6412.18	1357.95	96766.9	14659	112.332	9464.58	715.219	18347.8	11619.2	25769.8	11779.8	5226.41	1689.94	5982.02	54.547	264.312	63.9624	364.057	1214.91	7035.33	1040.7	326.79		15747	16422.5	461.517	2064.49	512.923	360.195	15.8751	92.8403		760.78	928.88	37086.3	81167.9	85.2998	462107		1935.51	2181.42	2459.05	697.129	474.174	12794.5	714.762	127.467	8014.52	569.252
DS1_156	3914.1		70940.3	4876.42	51.4442	11863.3	178.43	12480.6	687.025	9001.73	1580.75	2734.09	1607.08	5755.19	263.388	156.196	108.151	276.54	778.076	6100.34	2306.56	148.26		11383.2	3320.14		68.6293		63.9804	12.1566			937.905	631.098	50203.2	44368.7	101.945	363121		2136.87	3372.96	6357.27	329.742	454.083	6820.63	138.983	40.6144	5599.6	190.946
DS1_157	65069	53769.4	108791	4888.81	152.469	7136.58	231.39	14005.1		20199.9	1949.94	3432.69	2255.02	5848.13		171.94	24.8528	353.717	3942.37	6529.89	1818.91	221.663		22906.6	1136.84	49.6219	66.6662		47.7225				858.132	733.204	16652.9	146688		403824		2296.65	3477.55	3264.59	269.276	204.259	3843.01		113.521	2851.76	112.201
DS1_158	5043.09	2241.32	76926.1	49215.5	38.9194	13411.9	6730.62	6849.76	102543	16713.1	95787	1517.42	1154.17	4590.74	328.257	440.486	355.135	367.36	189.666	7533.62	718.495	146.616	43.7905	7434.5	43674.7	7358.65	807.972	550.681	4753.72	34.9383	72.8117	62.8774	566.544	639.414	107601	26531.2		462935		1255.23	2993.62	5588.53	3103.32	1582.22	44502.9	8030.42	867.75	36963.7	6718.52
DS1_159	8654.14	3983.19	113796	4592.75		5411.85	245.054	7805.82	1269.48	14889.8	1653.46	1404.2	3724.48	10874.7	39.1152	415.448		408.742	1160.08	3933.13	1030.18	228.138		15198	1890.36	28.5972	197.226		23.0126	1.95735		30.0216	445.856	398.24	9037.77	96448	79.6455	553342	66.6969	1887.29	3256.54	4042.49	375.925	123.128	2729.46		136.037	1679.9	57.396
DS1_160	5130.13	1870.2	81203.9	4278.57	31.507	7906.73	78.4731	35541.3	555.638	26083.6	2474.21	9919.49	2373.41	6783.11	173.816	141.886	199.481	289.02	2728.83	7990.76	1317.56	187.941		11680	1915.5				88.2916				1685.86	1152.14	38768.4	95722.7	67.7172	332533		1452.74	2953.9	4293.08	780.56	257.888	5463.1	52.6096	202.038	4354.93	116.169
DS1_161	5676.3	2375.73	70934.4	44176.9	22.2415	7523.02	5027.79	13258.9	66259.5	24780.4	52469.9	2430.03	1209.43	3824.21	452.083	386.689	456.544	267.013	249.434	5711.65	1924.58	480.45	114.337	6922.36	45440.6	3595.02	1813.89	1350.82	1480.48	104.948	206.718	57.9642	726.963	821.563	105330	33432.8	50.7341	509828	78.1662	1134.91	2672.13	5653.18	1834.21	2106.7	33697.6	4514.74	865.599	24773.9	2937.66
DS1_162	8900.7	3894.2	98391.2	5253.01	255.205	7199.84	211.075	17224.1	3331.12	17945.4	4164.94	5270.72	2352.79	7549.08	105.277	1101.9	179.331	648.973	1996.19	6975.77	1254.3	1177.53	45.2196	12442.9	4311.86	137.279	952.402		30.1153	10.2514	83.1724		725.269	1022.83	15520.3	96279.3	49.2699	472433		1344.79	3080.55	4032.22	878.451	53.9253	6302.87	195.672	196.118	3361.4	180.167
DS1_163	6453.74	2954.31	86067.3	14180.9	155.314	5313.5	954.881	39550.6	18309.1	35665.8	19776.9	10339.9	1572.76	6865.79	225.364	89.639	170.26	404.99	2247.91	5260.88	1589.5	309.016	110.099	10007.5	11041.1	383.758	2778.16	657.616	44.6207	30.0878	891.933	68.6283	2552.5	682.67	22222.1	101678	70.7799	453641		373.113	2939.02	4997.59	913.766	296.329	9570.19	473.979	507.194	5359.16	423.475
DS1_164	8500.37	3929.26	103106	3643.93	155.87	5984.72	164.107	13603	1210.61	22945.1	2601.02	3754.33	2217.45	8454.11	112.156	223.634	266.225	441.78	2669.78	6127.44	1433.43	406.238	18.8915	12283.5	4794.38	9.44741	336.901				62.6768		1470.17	558.782	44596.2	110511	109.53	479593		1312.45	3187.7	2865.03	883.321	273.888	8989.97	158.749	169.312	7192.24	187.589
DS1_165	4735.01	1515.9	78237.2	10927.7		10066.8	581.221	70988.1	6737.55	38315.2	10297.1	12051.6	1921.69	7341.49	277.106	151.28	352.968	267.925	1711.84	8689.28	1825.16	153.033	107.143	9167.88	19971.4	331.504	1622.41	799.854	276.033	12.2874	456.657		1800.66	605.236	65195.7	98343.7	53.8004	309059		612.103	2911.81	6234.85	644.691	501.212	10275.2	433.633	369.132	6769.4	366.616
DS1_166	5634.67	4120.54	120934	10266.2	379.041	5810.18	1010.83	18245.3	25307.6	39598.9	20792	4120.28	2028.63	5197.63	140.752	238.532	468.227	459.954	1275.7	5779.66	766.015	301.917	129.61	19606.1	37264.3	1248.09	3381.71	1491.09	436.975	11.9118	703.08	103.255	1234.48	1050.23	54884.8	86861.3	50.0093	612008		1808.39	3912.94	4113.75	774.208	873.172	22657.6	1528.07	521.308	14667	872.818
DS1_167	8339.01	3783	98165.5	19204.8	352.726	6050.77	2569.23	13079.8	50733.4	35386.3	48273.5	2697.29	1802.78	5611.78	160.479	355.312	581.932	230.859	723.517	5317.01	1077.87	289.811	503.291	8380.4	50483.5	2306.37	6629.45	2849.26	964.738	25.0475	2086.37	178.53	615.569	840.409	114017	51913.5	78.0734	607788	18.4894	1147.89	2118.17	2980.72	1508.89	1583.99	45932.4	3763.27	1762.5	28399.4	2979.81
DS1_168	43805.8	39031.8	94618.5	7001.72	133.818	6318.71	443.9	36857.9	7826.99	34074.7	7507.64	7133.17	2197.33	5646.63	149.014	103.012	229.65	141.35	2732.47	4537.88	1178.31	143.354	117.716	14645.5	14605.8	294.77	1366.74	593.055	24.5803	14.3529	218.274		1364.3	1041.57	35187.6	97996.5	112.906	383848		848.433	3185.97	3961.5	562.807	377.078	8870.45	378.068	311.022	4808.56	43.8271
DS1_169	8491.33	4504.8	122644	5136.25	245.377	3285.06	158.051	23624.8	1554.46	35077	3146.17	4412.5	2443.09	7987.25	26.7513	408.868	114.531	388.231	5465.75	3695.81	2370.82	239.284		20500.1	1836.66	63.6303	110.813		28.2855				427.818	533.808	14955.7	156766		636131		1361.29	3930.45	4111.31	817.433	163.851	2618.96		55.617	1642.04	343.694
DS1_170	7483.5	4431.77	83146.2	7600.08	57.1142	7584.85	440.415	31699.7	867.851	28162.9	3198.34	10723.2	2086.21	6990.6	92.6755	235.752	87.1386	590.214	3372.99	3762.44	2105.69	393.037		11042.9	2242.97	10.8545	180.214			0.0230656			1687.52	604.258	19981.1	96156	55.9351	455899	102.882	938.101	3124.47	6788.9	1179.16	162.392	4294.41	95.8898	269.95	3210.61	21.4586
DS1_171	7736.3	3082.67	82565.4	5154.74	104.316	5270.93	268.509	27768.9	1423.81	24526.3	3631.24	8112.87	1754.39	7380.84	290.861	1668.84	216.073	512.239	3969.14	6290.52	2566.76	917.958		6432.92	6549.37	137.731	333.657	86.867		0.00686285			1607.42	613.715	43057.4	107727	67.5952	442111	117.302	1184.35	4030.43	8681.08	1386.42	527.418	8413.47	317.012	551.625	6791.58	157.831
DS1_172	38488	26402.5	93738.6	7865.51	114.745	7428.3	1327.74	22038.5	70580.5	51167.3	105897	6346.21	1346.96	4086.83	355.191	297.467	1131.14	99.7941	236.013	7693.37	854.16	89.7781	829.028	8133.46	169841	4376.59	6543.13	5145.93	3287.55	135.852	2648.19	1521.13	951.259	1281.87	256351	34147.1		411604	70.9169	1692.05	1949.07	1923.19	1550.19	2770.39	77122.7	7424.4	2765.49	53210.3	5722.61
DS1_173	5250.38	2300.86	72082.8	7429.41	211.355	4147.35	637.183	29222.4	63398.6	37216.7	93904.8	6249.03	1278.85	3406.98	359.605	125.678	938.394	179.212	623.455	5484.38	1292.07	139.488	1365.57	7222.56	71835.8	4997.23	6172.92	9899.96	1991.26	93.8929	5390.71	1651.47	727.074	826.39	168828	34543.1	30.2897	454200	146.245	710.008	1794.43	2165.38	1277.22	2427.49	46920.3	4281.97	3465.63	31711.6	3741.66
DS1_174	7724.92	2991.68	83722.5	6426.87	64.6537	5090.62	253.797	46421.1	16246.9	38579.3	17738.5	9211.83	1688.71	5157.5	101.514	266.808	153.425	209.258	2889.9	6290.96	2608.63	368.338	324.593	8273.11	28852.8	1332.12	2317.69	1932.9	27.3568	32.5372	994.998	102.276	1146.06	992.842	55972.3	113752	55.9363	466818	238.125	749.1	2626.02	5251.01	1818.97	516.887	16479.3	992.058	1498.93	11127.6	900.926
DS1_175	9970.14	5884.2	111014	3469.59	166.975	2255.59	150.207	28895.5	1311.28	42564.9	3348.81	6587.29	2615.24	5986.64	279.818	351.532	328.796	333.953	3821.14	5519.5	1517.37	280.049		20658.6	4870.65					4.4086		23.8727	1630.45	333.047	42086.8	173394	71.6166	652701	128.226	1108.83	3698.29	3888.17	931.672	327.733	7423.5		396.659	5148.91	415.718
DS1_177	5141.89	3013.98	71394	6280.35	139.999	4496.02	467.471	44635.2	29442.5	52827.6	85009.8	11279.7	1081.69	3440.89	120.76	226.307	906.267	45.7822	667.581	4335.97	707.238	175.513	1107.45	6184.8	92191	2375.82	6800.17	10447.4	1026.15	107.151	7432.65	6696.29	866.967	756.444	138209	41575.4	42.1699	473585	201.165	735.254	2031.05	3003.69	623.419	1786.76	36440.1	3056.54	2845.4	23045.7	2156.36
DS1_178	7015.13	3056.19	83221	6675.38	59.8433	5629.65	863.807	33186.6	27379.4	45722.4	46156.3	9145.25	1474.77	5813.31	281.913	173.459	483.655	302.198	2888.77	3840.04	2088.67	208.945	316.384	8267.29	64346.9	1188.04	2021.16	3401.14	260.544	104.954	1425.76	2301.11	871.95	787.488	110171	120072	47.3276	466187	122.627	926.794	2619.43	4197.15	1695.96	933.034	24697.8	1801.94	1787.64	17676.9	1377.53
DS1_179	7821.76	5210.94	102535	3315.92	428.543	5076.27	143.229	47300.6	2432.88	49964.5	6731.81	12227.9	2557.83	6858.19	259.388	499.088	386.3	132.707	3446.87	6705.79	1227	227.431	226.736	11945.7	12981.6	131.614	1242.39	807.294		8.78648	682.477	66.2	1571.99	613.697	58647.2	176812	78.4662	514359	194.483	1082.87	3462.49	4717.64	969.572	231.033	8551.45	308.22	588.092	5051.5	185.569
DS1_180	6131.1	2874.09	92447.1	6093.11	154.613	4034.83	449.811	15871.7	66888.8	32992.2	208349	3692.45	1451.23	3922.77	289.825	292.396	1225.94	228.432	280.32	5105.1	1027.79	594.879	62.7327	6176.4	106622	2833.2	580.758	2173.08	2230.2	203.226	687.099	2636.03	659.401	772.554	163305	46473.9	14.4991	668975	226.765	513.769	1773.96	2038.21	559.727	989.043	31738.5	4130.23	818.324	27798	3330.04
DS1_181	8609.9	3762.86	102427	5111.45	180.614	4188.93	153.717	38955.2	2985.08	51365.9	8598.72	9088.21	2371.2	7406.28	59.7667	1137.71	187.391	391.92	3489.86	3764.93	1711.94		48.1716	13260.1	8543.8		519.78	420.049		12.9105	337.897	63.8625	1023.25	678.441	32433	155847	112.14	528910		864.707	3052.7	4133.11	1590.44	494.883	10425.7	561.819	812.95	7981.29	301.801
DS1_182	5832	3290.01	101337	4733.9	124.306	5340.51	493.811	46294.8	1848.5	46254.2	8144.04	11622.6	1639.11	5517.75	147.143	235.935	124.948	333.23	7247.31	4607.86	1753.11	202.394	224.676	11881.6	15464.9	162.255	994.528	1472.45		86.8322	731.922	264.482	1587.17	564.989	38738.8	182251		446272		560.772	4398.2	9885.92	914.496	301.087	6444.86	184.973	551.323	3487.75	366.671
DS1_183	4966.5	2822.43	66603.3	5178.23	274.096	5979.42	309.775	117675	42089.3	104432	124622	29087	1276.01	3840.58	277.586	638.127	783.807	127.346	564.211	8602.89	971.483		264.35	4832.79	95544.5	3027.96	966.566	3848.29	2421.6	208.135	1446.66	4854.59	638.943	895.208	172603	37815.5	42.9341	373603	340.551	495.31	2165.43	3308.02	946.818	2494.03	41839.7	4091.19	1774.28	36598.8	3395.4
DS1_184	9496.85	4933.49	110576	2897.06	270.301	3433.55	144.831	28436.5	6900.32	51562.6	18656.7	7142.06	1868.84	5192.54	62.9279	237.184	582.351	491.967	2462.42	6120.56	1101.82	483.498	537.754	18982.5	38650	168.019	1913.83	3473.1	95.5318	60.9215	1336.33	2170.91	675.821	1130.82	72913.2	140673		631878		501.734	2413.44	2631.47	478.698	538.67	15587.4	729.464	1430.08	11626	387.989
DS1_185	9009.43	4158.61	96758.3	3844.03	160.924	4340.08	70.5769	48640	2237.35	43774.7	5687.55	11433.5	2325.09	7178.34	68.3881	243.23	72.0201	465.945	3574.71	3503.57	1296.17	168.671	128.608	10966.6	12200.6	58.9192	556.405	429.743		10.5258		482.066	780.114	821.457	31790.1	180415	64.6142	478705	338.189	1100.98	2966.31	5230.15	617.196	147.599	6365.15	419.695	476.85	4388.93	75.9173
DS1_186	6829.53	2439.23	110302	9634.3	82.1588	6805.93	1298.76	1221.55	253902	29353.7	437448	163.575	1012.37	3117.39	849.232	1065.03	1570.9	458.174	58.7938	4871.72	1630.76	539.879	514.31	1583.43	124144	8504.48	2084.58	4600.16	4337.5	183.43	1720.79	3490.64	699.428	890.063	603791	10749.5	44.7023	798216	169.432	558.023	1008.23	865.056	2236.64	4388.48	73739.1	4060.55	2626.23	57500.4	3150.99
DS1_187	4690.17	1492.24	86969.2	3224.48	256.865	6186.35	133.422	44788.1	20324.6	64979.6	73641.5	11274	1096.15	3505.22	139.417	166.253	775.202	248.387	788.552	5002.99	1306.53	98.1243	745.372	8131	116313	2096.21	3262.54	8836.66	1402.91	158.665	4799.42	5839.62	686.257	693.089	156847	53375.4	21.0375	530507	195.454	600.674	2203.87	2612.6	864.142	915.634	37071	2124.07	3224.44	25108.8	1935.99
DS1_188	4175.85	2593.74	64592.7	4675.76	166.429	3798.01	235.424	25285.3	38202.1	45521.4	139651	6807.4	1283.75	3366.5	249.565	733.418	765.585	195.232	196.498	5654.76	1049.62	264.615	155.089	4793.55	117443	5035.38	716.534	2047.17	2753.63	233.601	730.534	6306.4	462.008	909.104	181729	20280.3	40.1621	395743	281.85	712.337	1958.58	2027.89	791.33	1826.42	36309.3	5504.79	1171.95	29779.2	4836.87
DS1_189	6354.16	2568.85	80171.1	4412.3		6110.86	433.381	49308	10279.6	60802.1	29675.5	13166.8	1308.92	5818.97	289.385	135.559	714.194	232.243	3662.44	4589.97	1352.25		985.081	7846.9	68004.5	1818.63	4400.51	11028.6	382.284	54.7828	5681.56	9949.93	1606.34	496.312	106736	116922	34.3907	447986	287.604	492.772	2531.21	5244.73	514.316	351.845	19931.8	951.16	2795.39	10958.5	664.365
DS1_190	6282.66	2784.83	74840.1	4853.19		5658.4	403.574	81392.1	13805.3	65223.9	45769.9	13216.1	1736.22	4443.9	207.433	209.286	883.753	119.18	3863.9	2618.44	1360.91	160.246	1134.92	11633.6	75320.5	3172.92	4768.45	11237.1	665.484	116.629	4712.41	8557.99	963.053	472.395	104751	147728	28.2171	479028	392.321	316.004	2839.88	8265.2	556.752	267.606	14533.4	1135.41	2618.77	8776	887.392
DS1_191	8123.23	3695.49	84432.3	3215.02	118.747	3835.2	112.462	44706.2	6764.34	76589.4	24219.9	8997.35	1966.16	4522.48	109.935	16.4002	566.691		2691.87	5087.37	1019.72	107.819	1352.81	9748.26	86759.7	2807.18	5755.45	6426.87	471.424	217.028	4141.38	5394.54	666.707	725.446	101073	103396	34.4917	576406	235.049	745.29	2206.7	3097.54	518.67	229.024	17767	892.038	3061.94	8916.96	850.553
DS1_192	10245.6	5084.89	149181	2432.56	123.228	4914.84	40.5467	37781.2	4727.27	67380.6	18651.5	8117.5	1818.8	5136.27	63.6707	385.369	207.525	531.864	5021.37	2900.98	845.346	266.995	1513.17	15673.2	48127	724.397	3956.27	5266.82	65.439	48.11	4432.26	2038.46	824.112	442.279	64983.9	234902	53.1391	713615	412.26	799.233	5567.76	6099.87	339.318	199.632	11322.4	303.872	2395.41	5217.56	183.704
DS1_193	2074.13	166.693	56132.1	12276.2	32.6612	4942.59	949.77	51467.4	51200.3	69913	281305	17033.8	856.716	2927.88	404.01	950.103	1403.58	128.147	523.405	4262.03	827.305	112.544	119.708	3136.41	126747	2822.05	363.339	2233.93	4384.75	260.337	497.254	8478.68	907.04	1023.78	231756	54760.5	60.5943	380672	307.363	415.086	1875.14	3336.34	1352.36	1532.77	46364.9	4267.8	1551.47	44767.2	3873.39
DS1_194	1776.11	1199.4	76712	5682.1		5025.92	517.592	33529.3	42898	63671.9	137036	8583.38	1199.29	3808.28	296.022	231.125	1175	204.314	1814.59	3172.74	1427.59	139.915	1229.35	7732.58	166538	5203.01	10440.9	27999.7	1889.49	224.308	12372.1	17295.9	698.747	420.804	173316	82019.4	30.68	547247	151.592	373.923	2786.1	4941.12	766.079	818.372	42525.5	2363.62	5959.4	24456.9	2279.12
DS1_195	7497.4	3410.85	105540	2772.96	37.5443	6020.11	150.158	58861.6	7349.07	62952.9	33159.1	13285	1750.28	6026.16	195.63	378.867	652.057	307.513	2002.97	3867.37	896.265	41.5989	532.714	10571.4	46986	547.248	2150.51	5146.37	300.737	133.399	3291.78	3458.73	932.652	597.47	93084.6	119015		505058	120.517	165.519	3061.18	5597.64	287.379	444.639	14656.7	708.147	1906.86	8586.37	578.79
DS1_196	5649.78	2570.73	92841.6	7411.02	264.569	6519.7	932.062	14232.7	57488.3	42383.6	154143	3413.2	1330.03	3284.48	396.267	656.186	879.434	140.765	530.565	3979.12	1263.69		406.288	3774.74	97752.3	2293.95	712.915	5164.7	3500.82	194.941	1039.72	8773.31	996.932	650.002	290065	35741.7	43.267	612658	251.094	559.341	2076.85	1952.55	328.724	712.891	39299.5	2336.39	1801.55	31093.2	2451.81
DS1_197	64328.7	43942.4	107848	3351.13	89.0993	3518.69	545.158	23426.2	6137.61	52906	18019	5624.07	2061.28	5216.22	227.765	87.3094	309.587	174.542	6288.34	2695.19	1452.98	159.513	773.564	17218.4	57094.7	687.93	3492.78	4736.36	209.763	62.7927	2361.01	2515.15	1220.63	102.45	82343.9	226740	52.6582	518178	259.693	643.868	4340.6	8768.97	922.913	360.334	17926.7	440.638	2362.69	9669.79	529.018
DS1_198	6601.45	3054.31	94492.3	3883.21	47.3857	3928.27	118.321	35542.7	10413.5	48147.4	23745.5	7629.48	1661.56	4950.72	336.816	129.721	167.215	194.159	2630.68	2929.19	1487.89	156.715	474.99	10903.8	42711	510.393	1144.48	3523.13	410.156	82.1393	1912.91	2882.26	1012.31	463.481	81612.1	122855	42.5253	508725	222.422	838.087	2509.8	4438.18	1107.41	422.456	18358.1	641.491	2133.97	12227.1	350.531
DS1_199	6475.59	4045.43	98512.2	5038.78		3905.49	407.839	15803.6	44031.7	40286	132760	3136.23	1670.98	4365.29	283.962	499.399	1095.04	235.868	638.783	4003.15	1142.2	252.416	126.191	8636.24	86066.6	2541.89	348.338	2069.11	1983.72	162.668	590.902	4391.73	814.205	448.863	209375	61599.3	36.8222	663136	223.954	600.419	2663.77	2413.82	617.637	1274.92	32952.3	2752.94	911.166	25755.7	2526.9
DS1_200	13344.3	3778.28	136981	2665.65	121.112	3739.43	119.181	23780.4	6214.41	47533.6	18931.8	5520.29	2048.51	6072.78	100.362	134.317	461.634	370.833	4233.79	2889.33	879.355	229.588	389.457	20952.5	36816.7	331.366	2853.46	3180.93	51.9303	51.0134	2172.26	812.568	804.191	247.465	52176.9	239148	76.5764	724346	256.973	597.695	4077.09	5204.12	870.83	293.7	14167.1	587.469	1765.26	7960.85	102.976
DS1_201	8115.26	3966.1	98739.9	6039.17	146.324	4452.29	459.703	35172.7	38084.3	52537.8	82437.5	7607.09	1466.52	3969.02	664.329	233.54	1078.6	112.316	2071.31	6033.46	819.723	203.752	283.549	11130.3	58081.6	4032.25	1688.25	4073.49	1055.57	93.4898	1304.68	2249.8	1541.06	489.677	155962	146518	54.9223	608127	230.064	519.843	3394.59	5020.88	1038.96	649.479	22326	1340.48	1309.56	19232.9	780.267
DS1_202	7045.4	3113.22	99226.8	3518.21	64.2132	5264.47	256.156	49339.2	17484.6	60358.8	43552.3	9889.79	1111.47	3229.04	130.513	296.71	323.245	291.025	2590.4	2990.42	1047.28	167.856	357.002	9425.87	59147.9	1022.65	1310.33	2739.89	880.047	105.895	711.006	2581.85	776.512	505.864	112106	135069	49.6504	522285	200.979	440.98	2556.78	4442.56	371.805	244.524	13477.8	1179.4	1235.86	9682.5	1042.89
DS1_203	8202.16	3995.53	101042	2251.05	54.4745	7040.71	76.8504	39682	4619.26	55566.5	15707.5	7735.36	1887.8	5289.1	151.018	33.5347	254.03	179.089	3900.37	3396.72	828.627	327.196	554.476	11762.8	54049.4	883.509	3235.97	3425.52	265.353	103.292	2113.01	2665.79	1155.84	660.903	105989	158816	50.4009	595140	223.809	975.026	3127.8	3695.09	547.291	248.587	12551.1	542.579	2093.17	6080	356.064
DS1_204	13657.9	9863.53	121365	2046.11	23.292	1760.65	160.39	13800.6	3566.38	24637.3	13265.7	1472.15	2825.6	6991.65	684.739	1.77001	504.86	293.886	3535.09	5816.05	649.414	463.712	461.303	13342.6	37569.8	606.579	2042.88	2768.89	28.4001	5.82175	2640.74	1450.8	1641.99	55.2299	78174.5	200689	67.26	835279	318.044	716.903	3292.23	4811	751.864	271.295	12590.6	200.806	1693.83	7750.55	264.475
DS1_205	2120.48	919.974	34391.5	12622.5	76.2063	7252.3	989.332	52017.1	73328.6	28872	408461	10657.6	946.236	2662.41	573.887	2067.05	1137.15	333.958	114.52	7989.82	783.844	68.6892	261.979	1525.28	111216	1993.89	545.038	4593.48	5094.53	522.814	852.548	11650	1402.06	2008.36	171694	6998.08	61.7799	201890	108.627	869.597	1118.37	3008.35	1353.52	1962.94	57936.6	4271.55	2536.95	49224.1	3880.37
DS1_206	10197.1	2316.32	133725	4380.23	2023.97	7795.88	194.403	771.749	30884.8	20055.6	124313	174.594	1023.03	2843.52	339.137	851.661	1155.32	485.576	374.63	6114.47	807.81	239.142	475.977	690.66	93221.3	4910.84	1245.32	4209.61	4999.54	361.166	1118.22	3862.62	889.798	881.009	339633	9046.76	36.8168	858622	291.609	649.116	1256.04	744.418	1368.67	2392.38	79945.2	4709.27	2733.32	61581.3	4145.36
DS1_207	4532.62	1662.07	74150.3	13721.5	374.643	5185.31	2477.27	26659.6	209950	43573.3	526983	6734.84	1420.48	3335.42	981.15	879.812	1493.03	225.096	0.728981	5077.46	984.958	100.385	320.885	4552.58	124992	2910.29	667.911	4147.05	3649.89	263.369	824.48	10242.7	868.195	1035.73	247199	25326.6	66.9261	394237	94.703	505.162	1765.79	2180.99	721.169	3520.97	58382.7	5229.95	1964.33	47305.6	4761.93
DS1_208	6160.1	2637.88	74440.1	5317.81	8.53615	5089	576.548	35801.3	18038.1	53753.9	72042.4	9991.05	1327.76	6964.2	241.591	179.781	580.203	138.636	4063.05	1652.39	641.106	133.046	1204.54	9125.31	89256.4	4514.11	5274.25	19201.1	1609	127.791	6798.95	14175.7	733.786	303.342	101178	133867		480441	164.901	518.806	3161.33	7407.45	913.049	617.732	25167.3	2141.27	4134.43	16180.4	1966.37
DS1_209	3697.1	2427.14	70047.1	6297.94	126.297	5857.33	489.445	20225.9	64924	42012.6	231454	5167.64	877.087	2571.21	914.592	629.942	2235.22	256.904	502.802	4717.4	1231.92	387.915	193.695	4961.53	126826	3694.94	659.784	3757.78	3405.45	333.462	938.954	8753.72	1120.48	870.616	221319	30701.8	33.0012	427965	186.836	465.526	2242.52	2696.81	842.857	2052.26	38545.4	2889.12	1402.91	33470.1	2890.75
DS1_210	8016.35	3137.55	91919.4	2443.21	176.003	3736.78	258.404	26730.6	21896.8	54439.3	57241.9	5280.77	1450.58	3867.34	154.185	187.597	471.309	246.61	1841.47	3401.71	1238.53	151.512	401.889	9114.73	117062	2509.63	2777.24	6353.95	1321.69	151.689	2581.96	9467.72	899.792	323.607	127742	102296	54.0588	689228	397.575	557.281	2210.91	3794.24	550.071	296.353	23183.4	2279.27	1780.77	16104.1	2177.09
DS1_211	4009	1873.71	67179.9	8670.07		3828.33	610.398	47716.5	36354.3	43784.6	160237	9946.46	797.909	2777.19	334.443	830.426	1021.38	193.276	376.169	5506.69	1315.08	122.791	696.069	4952.51	101358	1955.77	1740.92	7274.64	3095.46	251.253	2460.98	6870.28	1077.52	1134.61	219014	27682.9	47.2568	381120	210.724	476.703	1594.06	2171.96	1410.69	3061.45	63564.2	3467.9	2734.15	49870	2886.74
DS1_212	4109.56	1519.21	74552.7	5909.46	226.284	5849.62	330.591	13202.5	7446.69	47996.1	14000.9	3315.63	1630.64	4540.34	174.148	221.987	234.087	231.537	2153.98	4957.85	2111.07		699.213	4267.29	138438	4717.89	2577.1	13112.1	3864.67	342.52	4303.99	16376	981.949	1002.34	252147	36804.2	41.454	498206	193.293	893.842	1943.69	1586.54	498.857	342.02	35808.4	3677.39	2828.44	29258	3188.85
DS1_213	5100.01	950.912	112027	2388.09	226.357	4974.86	200.163	77806.5	6476.74	82654	27746.8	16520.5	1868.57	5084.2	195.269	360.166	625.559	371.408	7508.68	4223.23	780.597	211.181	493.338	15308.8	64450.9	931.272	3267.13	6562.6	293.513	115.951	3243.04	4545.97	1106.72	561.63	86274	230257	71.3916	545878	335.086	418.07	3709.81	5399.35	129.603	205.164	11965.1	252.869	1949.66	5325.71	255.287
DS1_214	8835.26	3203.18	108859	2789.03	17.2796	4309.74	201.666	31223.6	14899.7	57818.7	43951.8	6109.56	2885.05	7240.49	173.7	493.133	711.696	246.263	1029.73	3187.31	910.782		320.081	10278.5	66699.2	1415.45	945.985	3688.47	960.588	96.1853	1075.55	4484.58	853.653	302.633	133325	116826	78.4154	710086	284.939	436.201	2997.05	3682.81	553.712	527.64	19612.7	1046.64	1709.84	14462.8	930.587
DS1_215	6524.28	2397.15	88392.1	3660.47	119.738	5994.83	252.911	84921.5	16482.4	68470.2	66538.8	19709.7	1308.48	4171.97	128.488	341.389	950.493	194	1934.61	4017.2	818.296	0.711111	200.564	8172.35	78809.3	895.847	466.591	2206.3	1525.23	199.093	349.038	5633.12	1099.36	910.449	145517	112382	52.0786	521792	91.7291	612.45	2729.81	3712.02	366.784	372.122	14412.5	1594.97	963.963	12701.6	1375.14
DS1_216	4469.57	734.436	80448.2	5738.36	22.0505	7321.01	570.926	108116	8405.07	75137.6	33423.6	22835.7	1407.79	5290.89	97.1058	209.443	498.609	181.039	6021.49	2453.82	1242.63	146.243	570.448	10901.3	62229	1600.5	2438.86	6107.43	462.645	111.113	2553.02	5614.93	1379.02	687.494	83623.5	213504	63.8261	408754	90.7022	590.868	2797.8	7914.77	595.89	198.626	11417	710.785	2657.79	7143.38	667.577
DS1_217	4681.35	1792.16	73344.8	3596.79	127.932	6616.96	440.172	64408.3	31351	55658.5	87371.8	13836.8	1211.34	3186.24	279.073	199.793	667.463	93.1786	1047.93	7227.26	1533.77	159.378	180.092	5802.24	90452.5	3005.49	427.001	2961.76	3166.24	118.361	782.477	8367.9	1369.84	915.988	224839	49894.5	31.8439	392305	324.808	383.635	2175.45	3045.13	659.931	1430.16	40960.1	3733.46	1302.4	32185.6	3276.28
DS1_218	7068.07	1438.24	96074.7	4262.46	522.86	6566.97	465.358	29585.3	37234.9	46185.1	130233	6675.09	1256.92	3098.65	159.785	236.422	717.792	179.583	660.99	4274.43	888.44	81.0367	288.723	6947.73	91752.3	1929.15	583.037	3244.23	2953.81	212.446	859.607	5971.9	394.744	768.322	193328	46079.6	40.4827	461238	209.332	629.919	2047.29	1932.99	314.933	748.47	28806.7	2972.91	1259.3	24096.7	2501.6
DS1_219	4927.07	2544.56	113302	1668.1	181.393	4722.44	20.0135	47448.6	15078.2	83070.9	80773.7	7852.04	1809.26	4491.08	225.451	194.207	469.955	161.859	1787.57	2439.9	957.974	206.172	933.272	9039.84	138601	1851.51	5056.56	12248.3	1214.17	322.489	5915.96	11599.4	562.258	590.829	134003	118420	39.096	681127	830.446	260.39	3204.91	3801.37	390.863	301.531	21604.3	1041.38	3490.49	12423	817.097
DS1_220	4094.27	2373.08	83986.7	19005.1	682.566	7142.82	2639.08	2970.86	189688	21386.1	467636	552.491	788.197	2667.6	1385.29	2371.12	2038.15	164.96	3.81189	7108.47	2052.14	365.719	75.3314	1732.02	90692.3	6622.21	1139.67	2971.34	3225.01	293.709	690.898	5468.82	1243.85	1341.47	341715	4224.61	43.8851	585213	180.741	625.496	1348.53	1067.91	2090.04	6305.96	94825.5	3722.22	3019.61	77301.8	3050.23
DS1_221	8944.29	4120.85	109708	2747.66	43.2001	6947.35	324.172	46897.8	4371.5	58608.5	19421.8	9680.63	2083.81	5679.57	161.927	590.504	663.835	69.8193	6694.2	5642.36	1377.62	434.624	617.482	12919	34241.7	598.917	1736.72	3210.66	210.437	10.9465	1635	2513.01	1289.92	563.878	83675.3	203813	96.5361	584109	391.741	1082.82	3309.57	3909.45	726.497	84.7774	10964.1	780.773	1527.82	6288.36	357.723
DS1_222	3035.9	718.196	80157.7	9144.98	203.581	10554.5	668.404	15323	61156.8	28998.3	471897	3768.05	891.011	2461.48	317.475	880.039	1091.97	179.368	9.44176	6401.53	961.364	155.615	111.664	2019.58	167025	2182.65	433.183	2743.58	4890.93	189.15	686.406	5889.44	746.852	1693.94	256761	14204	28.5437	387125	142.936	640.955	1474.56	1853.58	1198.95	1656.7	71535.7	4134.56	1990.99	57475.3	3182.18
DS1_223	5185.37	2190.75	75592.7	4359.18	39.2784	3615.08	610.159	59284	19962.5	62543.7	66218.6	13709.2	1240	3679.44	197.455	289.494	766.242	164.562	2496.36	3037.93	1053.72	0.091651	296.098	7168.49	89881.2	2472.64	760.131	4222.95	2031.92	116.092	1103.88	10047.9	1680.29	517.337	137192	116016	50.6625	439908	213.988	409.312	2103.61	5701.53	358.571	157.844	15370.3	1834.83	1224.45	11928	2157.79
DS1_224	8787.45	3976.02	113915	547.212	198.501	4423.55	0.00288166	44554.2	1317.29	68383	4138.8	7413.05	3472.4	7303.48	483.49	24.1743	851.762	163.97	35.5486	3005.02	248.083	180.286	678.113	12558	55237.4	897.614	3446.11	5164.7	270.847	57.0701	3235.32	3139.26	1158.24	291.597	81077.8	177480	96.1141	744389	36.7016	3872.41	2708.43	3314.46	862.149	370.565	19308.4	619.296	2384.48	10815.4	477.881
DS1_225	6199.33	2427.64	80315.8	2412.12	40.808	5653.16	172.45	112949	8141.56	79745.8	38643.4	25807	1164.96	3683.38	226.629	79.2198	488.137	228.894	2356.68	3170.07	1479.11	411.16	180.225	8740.81	71275.2	1385.12	682.878	3214.55	1022.79	105.861	783.575	5370.76	1109.35	654.949	130848	168358	46.0578	479269	239.527	468.396	2089.67	7302.21	556.543	466.376	15197.8	1424.92	981.134	11594.8	1207.21
DS1_226	3592.14	2198.75	107429	2672.52	776.736	6015.67	75.6038	98579.3	20890.7	106803	102719	16481	1211.95	3592.81	214.272	276.712	944.219	181.614	816.555	4734	777.964	247.585	559.663	8288.41	164418	2317.14	3872.2	10603.4	1348.58	236.033	5564.7	10846.1	812.057	1180.36	170197	64739.2		683175	365.655	408.735	2044.59	1517.03	78.6287	471.1	24684.4	1052.99	3355.79	15625.8	1010.74
DS1_227	6684.47	2750.67	81493.5	4577.06		5373.34	518.999	63111.1	7755.78	54015.8	22134.1	13256.8	1593.25	4834.3	137.613	51.6444	428.196	314.433	4920.4	3684.54	2418.75	369.878	473.287	7300.78	60676.1	1018.03	1465.21	4549.01	407.577	46.5016	2065.34	6999.5	1673.73	579.444	75975.4	144653	34.7111	439120	406.978	601.268	2411.33	6732.64	1394.49	254.27	12808.2	1018.91	2033.08	7012.87	724.908
DS1_228	5174.17	3054.77	73070.7	3026.73	321.001	3936.52	162.003	56172.4	37221.4	58541.9	112828	12775	1167.42	3334.55	320.619	309.881	1427.54	14.2867	820.228	6271.99	1274.03	369.68	298.098	3973.55	95715.6	2599.79	497.047	4518.18	2649	177.112	1173.04	7461.52	769.236	1069.67	235657	49984.6	39.3907	366086	278.883	462.039	2215.09	2521.49	322.46	1091.79	36241.9	3076.98	1412.84	33228.2	2609.01
DS1_229	6324.56	3495.16	85075.9	1811.88	94.0517	3545.42	166.684	78834.5	16741.6	76148	49940.6	17258	1333.36	3684.24	155.02	274.036	705.238	30.6327	2326.97	3810.39	1067.69		462.471	9062.7	95748	1517.19	1080.61	5484.06	1469.86	221.973	1377.12	6575.39	835.905	761.368	145920	105056	66.6063	405709	338.58	432.839	2470.42	3934	177.789	156.254	14012.5	1335.29	1436	11392.7	1451.9
DS1_230	17874.2	13877.3	100044	653.557		82.2763	45.1446	2389.59	11245.4	15878	26061.3	110.76	3275.47	10754.6	604.513	1092.1	951.124	244.128	847.398	4718.84	221.602	1229.61	602.37	5382.08	37508	228.884	3353.73	3320.49	81.8739	19.0757	3271.13	606.413	855.931		92294.5	105840	128.816	1.93101e+06		188.793	3501.63	1941.06	477.388	79.3132	11169.1	315.741	1814.55	5696.25	317.129
DS1_231	3304.23	2419.7	64835.8	12886.8	83.9461	8397.57	1431.61	16009.1	67892.7	37944.6	445580	2915.27	824.794	2672.54	429.331	1444.54	1291.26	56.8808	124.426	7740.14	1432.96	95.0721	319.105	2309.4	125994	2250.49	989.459	4910.57	5048.48	275.856	1058.78	12671.8	1151.17	1826.48	308531	11247.8	32.5051	277574	227.002	652.71	1545.81	2052.75	1672.32	4909.78	82188	3317.08	2325.61	65264.7	2618.19
DS1_232	10035.6	7273.07	119957	15658.1	114.793	3877.85	308.975	26356.5	6550.66	52002.9	28265.5	3564.52	2135.17	5689.45	213.308	697.96	526.623	155.196	5825.39	2285.45	704.638	222.233	944.754	14364.8	53555	927.596	3233.89	5074.9	332.719	51.0765	4141.8	2428.59	2795.57	163.972	90613.3	261232	57.4415	666665	132.258	802.941	3031.19	3628.76	871.528	324.435	14929.5	711.195	1915.14	9392.48	537.016
DS1_234	4641.96	1857.86	67888.3	8167.46	304.513	5649.52	326.557	62480.8	36743.1	43049.3	255578	11954.4	983.724	3562.41	220.549	473.123	1375.8	240.923	220.062	3865.81	941.652		167.881	4497.69	97593.7	1265.15	264.464	2597.11	3204.59	138.934	354.24	9836.33	965.479	1433.43	221296	32125.4	56.2325	479462	337.435	549.348	1474.53	1700.38	934.132	2616.74	67303.6	3327.53	1521.43	54900.2	2857.67
DS1_235	5843.28	3320.63	69458.2	3467.24	30.0426	3715.99	225.266	57527.2	14905.6	69471.7	51605.4	12619.1	1269.45	3851.15	266.003	140.682	548.702	120.902	3250.16	2766.85	1268.43	161.014	1907.38	9244.11	91572.1	3874.48	9397.77	23898	772.743	100.988	11840.1	13927	1290.58	484.878	97606.1	120943	33.0401	517051	231.372	439.086	2228.8	6130.57	416.01	565.924	22333	1449.16	4368.07	10819.4	1061.79
DS1_236	4925.71	1465.68	78988.5	2737	64.7451	4625.46	271.513	63787.4	13383.2	62926.5	68453.5	14576	1359.3	3929.71	300.749	182.352	814.949	161.251	4228.48	2243.61	1089.46	107.288	933.628	8640.13	82302.9	2461.26	4131.48	12350.4	975.803	93.211	4717.2	6942.41	1104.21	401.284	118394	155662	43.2226	483714	200.228	379.45	2385.52	6536.36	565.788	218.582	15937.9	787.078	3568.97	8857.6	916.589
DS1_237	6932.38	4034.54	100267	2735.94	419.369	3032.26	55.9942	51558.5	19190.6	56262.7	81284.5	10800.1	1684.66	4433.63	411.037	449.298	1170.02	421.795	1367.25	3597.14	1060.98	119.37	426.429	10487	60602	1035.56	1753.44	4390.66	1819.06	76.4301	1398.45	3833.64	1667.12	451.577	179374	101650	52.0245	742815	271.292	542.271	1765.92	1594.82	182.977	494.115	20199.4	803.366	1410.77	14519.1	951.343
DS1_238	6523.8	2934.51	86610.3	3989.34	112.348	6546.41	199.442	55138.7	13892.8	47428.5	43110.5	12377.1	1594.59	6831.1	238.169	99.0999	556.384	220.414	4504.2	2455.82	1510.12	195.19	596.154	11932.8	41928.8	1964.9	2967.14	6975.96	597.229	65.3271	3142.03	3470.09	670.069	376.182	93685.1	151900	31.1069	449401	193.564	179.478	3020.18	7765.54	801.508	424.673	18965.1	1055.43	1877.29	12001.8	940.98
DS1_239	8686.76	2771.4	100439	1897.99	145.056	4880	232.996	59158.2	12816.5	71304.1	42677	11026.8	1987.62	4954.66	214.173	183.467	759.43	249.999	3160.14	1430.81	602.722	276.425	1154.07	10939.1	80067.9	2470.08	6278.6	9474.28	989.595	74.7695	6174.5	4823.82	1283.66	459.577	97024.8	201731	55.7296	742438	179.899	723.102	2490.57	3264.49	527.361	122.294	15064.5	1056.69	3283.4	8038.34	714.035
DS1_240	10331.2	4892.69	103771	2081.32	32.875	4928.36	225.539	59279.4	11933.4	75658.3	58416.2	14837.8	2083.51	4253.75	60.4871	231.724	579.98	180.308	3662.96	2509.42	780.808	226.66	761.867	11820.8	98650.5	2930.56	3453.36	11660.6	915.27	90.3849	5276.01	7264.13	735.727	634.27	135169	156260	14.0511	591195	493.249	633.82	3092.6	3967.06	340.91	244.752	17946	1063.73	3487.57	10992.7	689.489
DS1_241	5730.64	2274.77	86469.6	3820.39	78.2502	7256.64	206.389	64256.7	20727.6	84659.5	103630	13799.6	1502.82	4043.82	236.167	78.2639	757.58	199.526	1948.53	2846.2	710.326		1035.65	9444.64	118633	2850.04	5405.02	13082.8	1760.09	288.6	7640.2	9946.67	1083.67	714.484	158423	110612	15.2363	558240	305.254	511.306	2352.66	3020.9	385.723	512.367	22586.5	1486.93	3681.5	13575.2	1105.6
DS1_242	37507	25782.6	90742	4668.23	436.35	6332.18	300.918	47565.8	28993.7	72594.4	125656	10060.3	1315.78	3389.88	74.4089	189.641	792.617	35.6899	233.568	4228.95	915.72	117.599	969.581	6453.99	190354	4922.48	6135.48	16318.1	4178.26	486.099	6043.32	17446.1	846.286	965.387	187999	62295.1		470437	336.493	835.162	2111.13	1981.55	372.282	664.032	35948	1999.06	4647	25860	1609.61
DS1_243	5186.07	1636.51	85608.9	5520.46	646.02	7713.97	333.992	41216.7	19735.1	47979.8	95678.7	9275.79	827.067	2830.45	273.109	266.471	1025.13	270.623	294.581	4065.7	1042.36	1.99463	240.026	5383.74	100895	2228.59	555.927	3402.84	2994.37	97.727	876.02	8943.99	699.346	1361.54	239684	41180.9	66.9702	503764	210.457	692.485	1720.94	1608.13	521.147	2058.83	42491.8	2997.42	1501.93	36395.4	2353.86
DS1_244	7896.02	3711.53	114980	3578.19	349.902	5131.27	116.853	26572.7	30121.2	41640.2	89977.1	4429.95	1549.4	5248.06	206.742	258.835	728.759	142.316	745.465	4463.08	762.047	146.87	123.73	7738.38	58464.3	1468.84	342.258	2070.91	2173.01	124.354	371.267	3651.62	1024.16	327.698	186661	79831.3	75.2089	771158		414.612	1945.74	1862.41	531.689	795.047	31293.1	1274.53	1010.2	24652.2	1350.55
DS1_245	9077.71	5505.19	103337	1345.45	134.95	3383.2	166.073	59807.2	7537.1	71842.8	26125.8	12185.3	1929.15	5477.09	94.7728	293.978	474.788	111.227	4915.11	3094.69	839.287	816.093	1424.76	13803	74749.6	1830.61	5905.41	14277.9	427.244	59.8409	6775.59	8005.03	849.697	342.581	96701.3	201148	69.7693	626260	303.975	830.026	3851.64	4934.8	372.192	107.24	14199.3	531.266	3581.78	6823.29	614.7
DS1_246	10213.4	4157.41	95877.1	5552.55	22.531	2683.75	837.289	31131.6	20466.5	54636.1	65767.9	4735.47	1886.33	4078	210.05	236.53	514.185	312.387	2999.26	3178.4	929.518	167.286	499.591	10379.7	100603	2035.31	2621.31	7009.86	1152.81	66.9411	2019.5	6740.27	1424.08	317.407	127816	135969	39.4675	731209	363.784	325.264	2988.95	5266.46	633.015	329.139	18578.9	1610.17	2566.27	12212.3	1593.1
DS1_247	4404.07	2151.24	68703.6	5723.25	294.499	3693.4	885.848	47103.3	47132.8	49852	229187	8604.71	732.742	2434.63	499.935	712.082	1196.02	317.178	718.335	3833.98	859.441	153.652	512.728	6465.56	138564	4720.51	1453.41	6977.91	3468.82	218.379	1539.47	8074.42	879.355	1052.73	246818	35395.6	49.0329	414415	273.867	289.768	1284.96	1798.13	1143.08	2078.31	56934.8	4984.78	2298.82	52758.6	3931.86
DS1_248	5260.62	2274.54	87356.8	4125.51	81.9434	5595.58	272.603	30031.9	37714.4	55195	113169	5878.89	1460.99	3636.8	182.338	401.559	925.234	131.819	979.75	3063.19	806.247	108.907	469.504	4101.79	112486	4280.22	1105.26	5777.75	4423.55	184.955	1636.64	9357.04	860.901	587.841	198696	63155.9	37.8711	595140	340.7	466.742	1992.85	2623.84	903.276	1385.02	46134.3	4157.3	1949.64	34753	3862.57
DS1_249	6894.72	822.276	91284.6	3430.1	403.828	5836.4	218.335	53644.2	25327.6	49722.3	123839	10173.8	1152.06	3739	292.726	277.76	987.3	91.4777	945.874	6172.62	1107.58	125.716	177.199	6758.75	102704	1218.68	403.349	2219.37	2225.57	158.385	586.324	3482.57	591.47	1234.26	197438	79323.3	27.8875	549282	276.412	661.548	2050.79	2310.01	709.843	690.765	33072.8	2578.79	1471.67	25843.3	1957.94
DS1_250	7719.89	4723	149905	2014.93	511.545	3723.59	108.438	20596	14043.1	56485.5	61390.7	2823.64	1826.96	4403.59	35.9186	318.034	780.233	222.446	1684.04	701.783	746.938	294.931	697.722	9154.18	87076.7	2007.74	1811.56	7584.05	1575.74	124.356	2745.05	7596.82	1144.4	303.24	148943	115196	71.1608	878062	371.119	605.841	3617.42	4651.87	241.473	206.538	14478.5	1041.11	2120.21	10246.7	797.531
DS1_251	7123.06	2674.76	75180.6	3194.45	98.7187	3991.77	246.963	70641.5	11761.1	61333.4	38420.9	14129	1504.1	5125.73	73.8819	53.85	405.666	255.713	2594.72	3360.17	1212.63	658.286	447.621	9363.12	86377.9	1991.97	1741.15	9203.66	1054.39	52.8239	1848.99	10691.3	2017.87	445.809	129737	149923	55.5085	539303	290.245	980.068	2914.77	4291.88	515.97	81.4151	15258.3	1430.04	1966.11	10012	1098.34
DS1_252	5026.21	2098.16	83661.6	3415.16	497.366	5519.95	194.059	63433.8	21992.9	58725	87934	13059.5	1349.99	4151.23	137.907	364.954	755.995	200.269	1583.9	3423.57	750.541	82.2443	351.252	6003.44	114752	2564.12	1219.45	4951.92	2787.02	122.057	1759.57	11567	806.499	792.611	201808	64128	70.4282	444224	326.269	479.229	1893.28	1645.84	556.833	1282.88	37684.8	3197.89	1930.98	31342.8	2986.21
DS1_253	10234.1	5042.7	124604	1840.46	167.726	3175.65	144.637	33549.9	7500.47	60621.4	26844.7	4645.7	1830.1	4392.66	806.352	451.699	1023.19	456.335	4160.95	6412.05	951.574	352.321	390.738	11840.4	68601.3	1115.49	2143.62	3896.91	164.451	58.9704	1797.08	4311.22	2347.62	218.132	145765	195059	33.8655	793393	557.01	719.949	3473.06	3795.05	301.725	425.697	16266.8	443.316	1322.7	9669.58	451.983
DS1_254	7715.69	3607.58	96337.2	1415.64	479.026	4041.8		76502.4	7877.73	66937.9	28448.7	16005.3	1653.97	5014.68	112.847	124.251	622.09	241.56	1581.65	4060.11	782.992	274.457	387.325	8594.46	61052.7	864.428	1867.04	4509.86	944.119	111.171	1778.44	4684.35	1478.55	1044.99	111436	69007.7	35.7217	739525	179.302	267.094	2045.77	1608.09	338.645	347.553	22127.2	1483.89	1992.11	14992.2	1083.58
DS1_255	7694.23	3103	79615.4	2940.68	49.2924	2960.77	274.222	64814.3	8345.29	55656.5	32663.4	14946.6	1694.03	4864.58	573.643	698.271	607.225	293.352	5546.25	5968.77	1304.89		1363.92	11372.2	67866.3	1872.29	6388	11863.8	300.904	77.4486	7261.24	6787.28	3159.51	606.579	73606	199100	59.753	551360	141.81	359.245	2812.84	6158.86	967.82	447.661	17801.7	847.671	3651.28	8917.58	531.761
DS1_256	2503.92	189.125	70233.6	3195.82	42.7667	4857.44	185.133	125826	20016.1	73207.4	81806.8	23362.8	1061.91	3597.85	232.959	173.297	1105.55	118.357	2127.16	2790.26	1363.43	84.3553	173.189	8534.38	117961	2479.34	550.826	3042.38	1934.45	172.683	648.561	8305.07	1145.56	580.281	178774	142743	63.3305	415254	389.091	274.249	2352.44	5787.53	868.094	565.952	21508.3	2384.96	1053.76	19028.3	2360.79
DS1_257	8738.69	3874.01	117053	5059.47	231.699	6820.34	416.75	34074.4	42923.2	40481.4	240826	7427.01	1054.83	2542.73	400.302	811.88	1344.45	473.797	202.232	4247.98	822.597		584.197	14062.5	23541.8	592.58	2398.43	2533.1	149.251	7.8194	1586.66	290.688	889.929	492.034	53770.2	148506	51.3677	557622	67.3026	732.915	3695.88	7081.94	600.819	853.665	9679.82	273.41	1050.63	5861.17	147.33
DS1_258	16331.7	12262	70388.9	360.012	80.2673			526.988	3001.55	3385.29	6084.23		5412.42	13360	1916.81	489.901	750.215	560.781	243.606	7956.53	27.3078	853.503	77.3718	1146.24	18112.8	101.932	473.35	1558.21		5.05811		558.441	4190.8		142190	72030.5	182.357	1.84818e+06		44.2796	3225.88	1652.8	782.562	725.857	13930.8	78.8746	781.082	9194.93	142.75
DS1_259	6708.85	2948.58	84270.5	2906.89	213.156	7640.17	259.882	67898.9	14940.3	70659.4	52340.1	14459.9	1508.91	4294.66	144.6	334.175	665.071	213.846	1851.09	2865.14	934.446	438.46	1148.86	8660.08	96078	3075.49	4694.22	8636.4	1348.41	134.743	4105.42	8346.53	943.53	734.618	162651	81897.8	49.7266	578961	542.308	481.54	1775.32	2399.67	201.938	205.167	20415.8	1577	2941.77	12345.4	1742.16
DS1_260	9060.75	4253.74	123994	1641.45	164.794	5422.09	67.3375	65591.2	9077.44	80363.1	30265.3	14772.4	1458.57	4714.47	105.799	170.332	643.725	180.74	3757.62	2446.65	801.255	287.777	2011.92	13137	78617.7	3043.31	5415	17500.5	812.966	133.385	8685.2	7975.56	607.611	570.129	106747	198848	41.0194	638240	239.175	417.862	3711.61	4658.31	608.114	263.442	20022.9	1002.68	4574.76	9253.81	880.969
DS1_261	7016.5	4557.21	95984.4	2890.72	110.917	4389.65	252.78	78261.4	9065.96	66940.8	34816.4	13039.9	1804.36	5066.52	76.757	378.076	593.931	134.678	3251.3	3413.11	1503.77	325.341	789.353	11265.6	61950.1	1575.66	4352.92	7955.78	529.232	110.337	4358.68	5643.24	869.93	518.447	98496.6	160195	48.3847	562121	325.072	559.333	3696.37	4837.68	760.336	169.597	14887.8	846.199	2573.07	7782.95	752.244
DS1_262	9135.67	4620.09	117336	1922.97	174.509	3193.86	79.992	53514.7	7810.11	57822.8	29581.6	9464.94	2278.88	5876.72	69.7303	20.7438	520.948	313.611	5001.59	2573.51	985.67	431.038	790.382	14654.1	37475.2	763.251	2605.57	4365.51	246.492	95.3015	2686.17	2424.55	1190.64	396.42	68457.5	241090	31.7118	685969	236.544	652.346	4202.6	4746.1	312.837	118.669	8405.57	168.705	1826.24	4323.01	101.151
DS1_263	8672.78	4414.09	101308	1063.3	212.141	2997.7		19461.6	2533.29	29571.3	8314.05	3126.01	1919.47	6171.7	1622.02	356.485	860.085	240.212	5996.91	4232.31	724.456	233.179	238.074	9887.36	44823.2	1399.53	1001.63	2360.89	375.899	389.074	1069.53	1497.93	2720.01	101.792	177555	224299	77.0431	777984		634.639	3884.7	5089.76	2442.73	690.474	22159.4	854.858	1741.65	15390.3	786.885
DS1_264	7729.44	3490	95540.8	1896.31	555.704	3825.2	45.7663	55874.5	12310.4	65969	44349.8	10877.8	1494.57	4057.08	82.0045	199.963	980.661	190.679	841.168	5104.66	979.767	227.067	523.464	8478.72	91513.7	1889.96	2119.53	6936.37	1746.46	121.465	2943.99	8621.63	1165.63	949.575	166267	75541.6	46.3559	713450	229.606	1027.47	1790.95	1540.09	331.758	859.402	32915.6	1313.46	2630.82	22075.1	1195.73
DS1_265	5466.64	2105.75	91813.9	5374.95	714.158	5768.07	499.479	49333.1	28014.9	45512.7	140459	9894.59	1074.17	3206.59	325.276	389.229	1132.46	433.147	651.901	5985.79	848.682	244.891	300.817	5879.72	81721.3	2036.57	511.998	3761.68	2738.73	145.662	641.538	6379.17	1001.98	937.495	200319	34602.7	32.895	422557	249.916	754.347	1709.21	1557.17	614.134	2577.71	47413.5	3291.72	1741.28	37834.3	2817.93
DS1_266	8487.7	4211.04	109706	1689.84	224.215	3010.09		40503.7	7270.64	48878.4	24091.4	8281.18	1862.18	4685.26	245.628	162.271	967.813	112.011	3022.43	6598.09	1420.7	283.675	446.518	15278.8	52000.3	987.245	1340.84	4982.35	674.436	67.5019	1478.24	5765.5	1489.29	700.972	109681	141733	137.087	685312	391.976	1149.7	2418.7	1956.15	410.573	532.427	16022.1	744.354	1996	10235.3	432.115
DS1_267	5340.09	3185.86	72405.3	3465.18	117.796	5279.14	273.396	120325	16163.1	77283	66270.8	23264.9	1130.69	3425.16	204.523	568.25	808.945	93.5078	2660.16	4044.93	1245.48		199.949	5583.36	83636.2	2182.07	469.119	4817.77	1922.02	118.112	1044.26	9695.43	1802.35	900.685	165069	103618	21.5488	333691	335.406	349.847	2173.93	4411.38	557.639	640.572	21812.2	2349.85	1396.22	18123	1977.63
DS1_268	6051.19	2808.89	90574.3	3151.17	155.721	2803.41	304.881	38151.6	23684.6	52825.5	94187.9	7026.18	1066.71	3637.17	248.924	231.156	772.712	83.0017	2792.1	5716.87	1644.44	171.66	273.256	7480.2	99840.3	3126.71	667.66	4833.61	2470.39	157.598	823.479	8285.42	2203.5	445.473	197860	122452	29.9845	586290	274.269	460.775	1945.85	2630.71	817.745	1272.38	27858	2833.95	1387.32	23016.7	2440.93
DS1_269	8975.94	6129.58	107045	1015.32	176.268	2567.19	139.995	44755	4543.46	44906.3	15757.9	7432.95	2216.77	5489.6	357.92	755.284	465.274	183.16	5247.05	5842.62	700.872	559.752	621.698	14264.3	44025.5	893.683	2539.24	3470.03	419.566	71.0666	2492.97	2373.77	1675.4	269.587	88279.6	231688	74.1735	712955	276.451	843.216	3405.84	4290.86	499.345	62.4915	11073.9	692.275	1714.29	6718.31	336.105
DS1_270	3370.64	1493.82	71484.3	8804.69	238.376	7994.94	1239.86	11523.4	112406	24899.6	500394	2728.11	958.542	2519.6	562.456	487.496	1258.4	125.153	37.9709	10360.9	489.832	97.7812	717.971	1877.47	121767	4944	1876.24	10549.2	6496.27	303.079	2498.75	13637.9	1145.39	1334.28	350300	11103.9	37.0245	353743	241.43	738.119	1864.36	2524.16	907.301	1851.77	53633.4	4358.87	2722.8	47417.1	4185.04
DS1_271	4682.39	1899.09	75734.8	7705.76		8256.26	690.622	55541.6	28937.9	45082.7	159695	10717.4	1015.99	5169.03	311.302	196.53	995.478	90.3756	1523.18	4928.18	1019.1	71.151	119.367	6303.45	78997	2894.17	201.064	1609.01	4743.95	161.565	353.292	5815.61	1178.97	653.275	201776	83822	34.4105	396037	187.763	544.803	2301.6	4602.06	1172.2	1239.61	39580.7	3912.67	1010.87	38381.2	3014.62
DS1_272	5688.76	2451.57	71345.8	2189.02		3372.21	284.667	64774	6884.52	59363	32885	12927	3492.63	35434.4	114.765	96.538	347.588		1836.58	2769.45	811.785	82.7321	994.841	9945.79	108843	5034.38	6283.79	17129.7	1399.77	167.264	6375.91	15844.8	258.731	314.199	101663	130198		501985		857.222	2806.3	5050.23	378.601	327.053	15174.3	1482.62	3461.53	9252.62	1258.47
DS1_273	4272.75	4217.71	99567.6	2749.35	90.0118	3476.9	116.409	42238.3	20581.8	70943.8	74281.7	6486.12	1604.58	5362.89	171.227	178.406	934.397	280.741	1464.74	2543.98	795.766	181.833	1240.29	8821.14	135793	3965.4	4354.8	13972.9	2201.38	193.037	5811.43	11188.5	831.141	310.974	165278	96580.9	32.4242	659836	519.331	500.205	2495.11	2530.18	422.547	394.123	23606.1	1690.62	4160.85	14537	1505.49
DS1_274	4994.03	1927.51	100897	4539.17	1561.12	3809.98	400.169	51330.7	37250.6	53357.8	161056	7691.43	1121.2	4442.1	455.037	393.173	870.394	193.936	295.94	14153.1	867.562	185.725	501.485	4960.27	103848	1753.14	1973.98	12561.9	2566.01	239.849	3995.78	9984.03	1445.71	1269.56	362487	40578.7		655153	497.141	531.644	1454.29	1148.42	531.277	1387.56	38430.4	1462.11	4559.32	29190.8	1289.43
DS1_275	9729.81	4138.35	108822	1681.32	309.093	4179.31	13.6038	57714.2	7589.87	53420	27171.4	9145.67	1793.95	5297.72	108.176	388.931	703.492	299.494	4050.16	5657.31	1369.76	226.892	255.014	15092.5	46736.5	1137.62	1631.27	3795.06	940.46	86.6201	1549.96	3455.84	1343.99	727.05	110583	184720	37.9853	639019	291.548	335.208	2266.04	1976.72	367.501	265.462	13301	640.688	1587.14	8654.31	923.737
DS1_276	7643.13	3610.64	98315.6	3036.87		4616.24	277.293	66002.5	10083.6	67505.9	32660.1	12333.4	1201.03	4471.49	89.2455	150.057	451.262	150.034	5405.36	3375.27	1214.98	162.292	2408.72	9840.34	69750.5	3139.99	6317.23	16898.8	739.671	53.2465	8828.3	8221.84	1172.84	441.552	76724.2	198945	32.2339	585527	285.006	467.679	3119.86	7420.47	641.937	273.646	20293.6	984.41	4470.34	9485.16	628.981
DS1_277	3255.94	2005.1	96749.2	2149.16	107.174	5838.34	93.5756	46417.6	24097.5	57024.7	115564	6865.83	1127.29	3719.22	264.922	284.61	900.717	131.962	754.703	5564.46	915.848	141.713	163.072	5765.25	120866	2115.71	526.449	3227.01	2871.75	206.281	930.711	5444.98	873.87	550.523	200787	66581.4	54.4587	637150	327.176	437.575	1733.24	2515.45	626.257	464.557	25054.9	2531.92	1081.6	19927.3	2153.86
DS1_278	4120.92	2608.81	57040.9	4041.07	100.964	3737.25	463.817	91448.7	17202.2	65008.5	50121.7	18636.9	977.292	3756.22	572.799	139.441	807.91	186.924	4122.43	4706.62	1379.96	88.7273	1022.87	5718.9	69070.2	3817.35	6414.38	14144.3	679.4	99.3809	7941.43	7915.41	2586.41	494.312	91477.6	118201	31.9346	450445	309.275	506.155	854.66	6732.91	673.009	451.207	19344.7	1697.25	3359.98	10488.7	1297.86
DS1_279	2153.72	2229.19	75707.5	3232.17	55.0432	4063.66	311.201	101492	9066.66	84223.2	53305.9	21169.2	1341.07	5183.34	284.384	189.081	866.779	165.651	5090.35	2993.83	1380.34	78.9858	1095.57	10084.5	132747	4522.86	6748.41	13293.4	996.585	171.586	7337.08	14701	1474.9	586.643	120538	171530		470437	188.916	537.074	2907.87	6739.78	664.875	645.394	23825.2	1443.39	3545.47	13519.2	1067.62
DS1_280	7105.62	3284.68	88453.9	2242.56	193.86	3532.36	174.797	63440.2	12967.6	60185.7	65541.4	11766.9	1800.98	4380.74	418.828	281.382	825.747	298.227	4263.18	6342.36	1472.19	166.771	984.819	11617.6	66691.1	2180.71	5508.43	11459.6	672.247	101.456	6072.09	5901.02	2560.3	381.092	130044	188115	13.4387	572983	352.541	484.646	3527.41	5156.78	529.74	363.861	16406.4	857.648	3810.26	8567.16	627.625
DS1_281	7418.04	1656.41	104954	2035.62	601.519	5822.95	42.7462	28845.6	17101.3	41963	75806	7101.66	894.435	3096.45	332.07	229.603	1152.6	262.017	592.448	3810.06	1013.69	8.41703	247.29	10906.5	87504.4	1447.05	511.385	2868.76	2617.26	167.981	585.55	7422.4	1163.14	715.513	186748	64243.7	43.7016	514140	32.9078	153.733	1631.23	2029.13	573.828	2246.52	31407.8	2252.46	1598.94	24442.2	2070.16
DS1_282	8807.63	3961.29	87117.2	1335.69	286.667	1194.64	111.913	53383.9	9964.75	61283.9	37340.1	10073.2	1780.41	4580.78	247.822	542.656	648.307	211.283	3845.65	3946.91	802.291	438.17	1376.87	12357.9	95335.5	3246.75	5522.89	14977	543.864	51.9454	6193.69	12770.5	1219.8	387.469	109543	175659	51.634	736859	372.27	626.992	3208.09	3358.62	577.322	268.488	21720	1213.78	3611.14	11697.3	706.502
DS1_283	6460.12	2845.32	70622.5	2469.45	86.6514	3586.98	240.193	69655.6	15212	64314.7	51683.5	12831.4	1390.85	3818.79	131.047	421.583	727.012	213.29	2240.94	4326.93	801.67	132.2	216.644	7393.69	97989.8	2756.4	438.431	4204.49	2219.7	137.814	580.671	9567.79	1253.47	565.596	168015	137880	32.2987	524545	200.916	518.718	2246.06	3770.05	625.288	412.659	25960.9	2183.84	1233.47	25101.4	1846.55
DS1_284	5879.04	2756.98	87418.3	1391.96	453.768	2865.33		75586.4	10032.5	53801.3	28701.6	12337.7	1614.28	4848.61	171.635	197.009	675.114	127.023	2802.4	5755.6	718.325	375.526	1022.61	12006.3	74222	2547.98	4397.15	9797.95	712.817	70.6156	4145.51	8109.16	1105.86	655.775	169171	129203	49.8612	621261	245.338	792.042	1998.57	2602.35	375.638	542.014	23738.9	1492.24	2798.7	14436	1158.11
DS1_285	5963.57	3612.32	70123	3291.73	13.2038	4114.41	510.17	112034	13450.2	77099.6	50087.1	22246.9	1282.7	4304.79	174.323	510.097	695.652	116.555	4994.49	3045.58	1445.54	371.902	381.415	7387.91	73342.7	2004.04	1280.59	7142.24	1080.8	105.809	1886.03	9019.43	1452.57	435.578	106966	158024	29.3839	404601	274.161	388.052	2342.53	8828.89	741.078	93.5288	11829.8	1093.47	2086.76	8301.56	1011.93
DS1_286	9829.89	5006.49	124413	930.633	166.595	2693	54.8251	62016.6	5467.73	75779.4	31826.6	9372.19	1970.94	5180.04	107.763	256.388	436.719	236.951	4013.5	3301.86	613.376	2.4167	1105.96	14646.8	78205.6	2866.65	3514.54	12649.6	1039.64	131.178	4621.07	8633.35	1290.49	396.774	122337	237563	47.468	784581	262.7	581.789	3102.49	3770.07	295.54	132.849	12496.3	534.128	4049.01	5182.77	553.212
DS1_289	7804.36	3293.17	110563	2002.79	119.602	5158.45	38.6922	72336.1	9863.69	76226.2	36536.6	14602.5	1613.43	3844.28	85.3052	177.068	575.114	178.936	2325.74	3665.28	1487.81	90.7085	797.933	10670.5	61373.8	1612.09	1223.41	5318.28	915.379	127.876	2148.25	5957.98	1504.82	532.335	113694	130108	57.3754	626927	430.439	672.619	2235.06	3910.03	268.072	148.014	11485	837.722	2208.07	7736.74	481.529
DS1_291	9873.42	4477.71	112693	2292.96	473.432	3432.97	9.02253	59560.4	10420.7	68202.6	42160.2	9136.89	1555.67	3550.6	54.753	282.878	564.374	208.459	1018.07	5679.33	1476.43	196.496	489.015	11439.5	69210.8	1436.09	2001.18	4814.33	1044.76	110.116	1915.56	6075.99	842.16	686.208	106939	120244	23.1496	794314	407.485	662.82	2309.18	2027.99	337.951	535.02	15260.4	1167.09	1642.72	11219.6	932.895
DS1_293	7316.28	9386.37	57651.1	2022.35	269.718	1114.2	117.458	65142.9	8294.37	47220.7	32614.1	9739.96	1934.45	5006.93	169.751	145.239	1000.42	330.189	3384.66	5628.27	795.032	244.602	1062.64	5270.82	56605.6	2123.1	3618.87	5513.54	64.7176	31.0612	2768.26	4878.18	1603.77	563.628	92993.1	106794	64.3744	629082	260.377	596.234	2185.04	2943.48	539.767	353.656	16477.7	699.349	2301.11	12058	539.233
DS1_295	5107.11	2323.82	79346.4	6619.58	931.535	4278.97	443.749	56991.3	32958.6	46948	164243	9788.29	1320.81	3311.36	307.319	306.105	880.497	243.296	965.711	8319.28	977.889	301.16	214.198	5860.15	84426.3	2614.76	497.2	3957.5	3753.16	192.245	369.095	8079.99	1084.77	1100.76	204400	48129.5	35.9284	443377	339.205	527.607	1707.65	1822.11	772.229	1912.32	40070.7	3379.29	1509.78	35877.8	2684.5
DS1_296	6425.41	2822.81	103235	3740.16	186.846	3612.88	171.022	42266.8	20170.3	65264.9	135141	7434.21	1257.66	4012.34	131.375	396.209	655.747	107.514	761.615	2937.69	841.472	360.567	505.293	6024.62	113586	3125.02	921.02	8240.19	3315.34	246.456	2063.95	15292.9	835.815	543.861	157716	66484.3	35.3802	645859	293.824	526.516	2148.83	1722.76	575.507	1395.39	32956.6	3016.06	2077.02	27192.7	2484.27
DS1_297	5603.23	1818.13	86317.7	6524.68	416.854	5335.62	442.343	53500.5	39515.4	46803.3	168096	9322.35	1473.52	3920.37	177.858	176.189	1118.02	289.359	670.166	5682.64	783.82	422.348	209.926	3694.92	91491.5	2192.14	531.235	2198.78	3454.58	106.815	985.763	4349.72	800.969	720.301	207995	58458.3	34.5575	676812	436.427	515.057	1665.77	1587.18	1206.93	2279.03	47488.4	3596.1	1598.68	40692.8	2829.61
DS1_298	6155.44	2325.98	66524.3	3512.86		2676.47	389.268	46262.3	16182.9	47821.4	50852.1	6777.39	1385.08	5529.73	327.395	73.6653	464.261	121.615	3965.57	4716.29	1411.63	0.0226024	1671.68	6280.66	95901.2	4477.41	7800.28	19017.2	1150.3	168.781	7861.82	12524.7	3341.51	459.398	107429	123665	42.7099	528385	276.367	314.079	1536.56	4869.55	906.414	394.77	26038.2	1478.25	4781.93	14315.5	1433.56
DS1_299	8508.57	3561.87	105510	1884.62	146.895	2120.79	49.9071	81016.8	8724.17	76072.2	27140.2	8121.55	2229.3	4938.46	1043.68	239.891	1190.3	178.104	5670.68	5660.43	1029.83	407.712	224.079	13051.2	61118.8	184.993	1758.34	2804.97	554.032	75.9181	1773.65	3139.9	2946.77	404.018	158139	212908	39.6371	785618	255.27	934.094	3323.76	2290.96	250.949	532.702	15086	810.532	1320.4	10162.1	696.518
DS1_300	9132.91	5851.58	103161	1590.78	209.777	2869.91	164.428	60318	8792.35	74063	38359.5	9817.01	2204.77	5097.69	290.692	739.653	584.592	33.5684	3007.94	5954.26	755.048	228.88	1304.58	7321.14	91244.6	2988.62	6439.05	14669.9	774.292	112.917	7007.74	9100.21	1716.47	317.449	100835	172937	54.3381	653939	256.499	817.681	2276.22	2843.16	299.856	266.044	18868.2	1328.96	4148.83	9990.1	1066.12
DS1_301	6575.03	2228.66	102200	8510.05	1730.39	6060.41	1619.67	3322.86	69148.8	17560.1	437754	590.505	1287.93	3297.78	513.652	1738.52	1316.13	167.533		9597.84	868.631	323.018	402.666	695.462	107835	2349.56	1080.67	3512.09	3838.69	201.627	766.639	6859.04	1071.01	2058.92	491693	16163.9	60.9843	775947	201.851	699.657	781.662	805.716	2336.48	5968.74	112861	3749.48	3360.33	95465.1	2799.59
DS1_302	7405.08	2945.78	92676.7	3208.19	181.9	2878.04	235.767	55891.9	14640.5	71317.1	72581.2	9900.22	1427.42	4741.1	222.697	214.227	642.781	208.014	3403.08	2855.45	776.529	135.395	740.513	10851	77518.6	2288.13	3610.61	10660.2	992.414	47.4247	4638.63	5263.62	1217.66	330.256	136126	167155	65.799	657295	167.099	793.405	2569.84	2952.5	1115.89	517.364	24648	1485.78	3656.54	15206.6	867.651
DS1_303	11007.5	4510.91	122428	2691.23	316.505	2238.22	169.949	23420.2	18563.2	49666.9	67159.9	3935.59	1725.85	4274.1	157.791	43.259	1032.63	335.108	1132.42	2821.28	513.545	809.454	587.244	8617.18	84647	1278.14	1431.83	4372.96	1451.53	154.712	1184.76	4858.67	1188.5	234.149	181159	129001	70.9592	1.03461e+06	287.285	1114.68	2770.27	2751.48	431.107	655.66	20222.5	1600.93	2186.3	14841.2	1052.16
DS1_304	4787.17	3707.95	94039.5	4174.43	257.651	5868.83	329.577	88134.1	20169.3	92185.4	133854	16979.6	1852.2	4052.15	43.319	344.645	1001.84	217.495	752.921	4328.73	538.731	123.367	80.0168	5086.76	112641	1457.27	170.966	2825.79	3380.94	131.47	415.935	7671.86	887.401	763.459	206047	58036.7	26.0165	633934	636.281	548.532	1755.14	1635.7	707.65	569.266	27286.9	2608.81	1368.34	22447	2107.49
DS1_305	2628.81	381.911	65063.3	6210.37	61.5963	5595.12	396.711	114770	36493.3	74090.5	195410	21925.7	837.784	2904.07	283.415	338.725	1011.39	111.283	1312.93	2420.15	1049.04	77.2789	105.414	5863.7	115456	2353.59	173.982	1637.71	4159.08	180.123	319.152	7952.82	1801.36	494.359	205642	101622	23.6385	370396	322.676	282.085	1909.8	5030.23	597.633	821.546	30578.6	2818.84	633.908	28609.2	2629.99
DS1_306	2595.63	574.91	92440.9	6343.29	1075.55	5681.2	912.814	17352.6	63263	46621.6	422038	3210.99	1191.56	4179.88	433.757	438.639	1170.98	62.9639	220.396	7800.56	459.634	145.019	666.36	1063.27	200393	5924.42	3398.08	21025.7	6713.73	332.523	5906.19	20920.4	1088.41	1718.82	408198	24457.8		553556	343.673	678.659	1257.83	1089.81	2316.38	4837.3	106579	6263.77	5793.72	89965.4	5633.95
DS1_307	6234.04	1597.19	81750.3	5104.96	804.165	3962.65	410.147	58239.3	23698.5	56144.2	133313	10030.6	1462.47	4135.25	192.604	199.093	1064.52	214.308	1183.8	4195.55	1153.93	0.368961	208.264	7041.37	58532.6	1206.21	227.548	2289.46	2547.06	114.252	322.316	6445.43	979.727	526.208	214013	68664.3	38.383	501500	508.161	1080.62	1868.29	2399.78	1009.38	3114.83	48659	2373.56	1813.81	37481.5	2124.49
DS1_308	7070.5	3083.46	100099	3569.72	204.325	3095.26	348.955	67494.3	15898.1	77485.7	56330.8	12938.1	2095.29	5209.61	185.608	160.988	459.717	267.985	2922.89	1993.18	536.642	200.276	611.792	9500.63	72757.7	2223.59	1204.94	5266.09	2223.61	135.755	1574.78	6146.76	1782.42	393.603	167117	156490	44.1079	568562	296.048	698.169	2415.26	3406.28	443.722	370.625	16598.9	1453.4	1657.69	12571.4	1154.8
DS1_309	8407.53	5076.05	102785	1126.42	371.137	4371.29	21.7692	116886	6200.2	102332	20062.3	22089.5	1889.35	5125.6	79.2423	854.023	405.321	93.0665	4843.18	3354.96	779.223	263.199	1226.82	12596.2	83756.8	2346.95	5711.05	9311.08	747.11	194.961	6973.55	7505.29	1210.32	446.239	100835	182914	55.9369	578406	386.951	833.034	2580.04	3274.5	537.858	378.288	15798.9	988.679	3094.19	8895.24	831.472
DS1_310	4180.6	1279.36	89115.5	2662.72	158.204	2529.89	157.743	82122.9	10730.3	97043	54758.9	15934.5	1525.83	5092.64	166.171	204.409	766.962	94.6035	5020.64	1473.46	1228.45	189.42	1041.54	9790.47	156236	6825.55	7381.5	17089.6	1236.39	245.429	8295.3	18532.4	1567.47	285.348	113332	177326	26.1987	569359	702.02	496.289	3340.58	5956.28	438.361	558.014	23466.3	1483.76	4530.03	11512.9	1145.73
DS1_311	4721.97	2049.11	94490.3	8944.53	312.474	6629.57	831.127	20967.3	33254.3	34165.8	173399	4286.42	896.528	3168.98	321.892	427.812	1630.05	99.1434	197.201	8163.59	1360.16	202.62	481.901	3656.95	82232.9	2329.92	746.279	5081.45	3856.58	158.974	1210.56	7931.06	1241.93	1059.07	239173	21742.3	47.3995	472001	204.607	716.628	1289.05	1289.85	1554.32	5072.79	77857	4372.33	2700.09	67769.6	3902.42
DS1_312	6410.77	3799.39	86465.7	1377.42	297.181	3252.95	44.2336	108897	17072.2	86865.9	59875.7	16309.6	1442.87	4274.28	75.3384	303.26	648.017	159.716	1471.68	4653.18	792.161	156.358	687.358	7750.24	87474.1	2664.64	2396.16	7918	1451.28	132.033	2714.03	7869.89	1184.35	528.965	136869	79612.8	47.4283	691827	399.731	689.046	2420.22	3251.76	437.451	376.95	17656.3	1809.15	2261.58	12091.7	1454.25
DS1_313	6166.43	5110.6	97104.8	1842.76	153.269	2960.78	145.867	34346.2	14353.5	51671.8	46160.4	6126.08	1815.58	5456.53	389.185	1110.08	821.149	58.9148	1933.97	4778.74	598.438	607.404	323.115	7760.02	71893.4	1586.29	1188.37	5691.09	937.107	97.9943	2125.62	6231.14	1383.59	223.112	142110	136758	68.9269	599445	244.988	644.806	3258.69	2946.47	580.803	563.132	19514.8	1107.98	2097.41	12938.8	823.529
DS1_314	1955.06	577.533	56227.9	10158.9		3749.72	1082.69	16011	100280	39314	731866	3589.61	787.928	2036.19	708.968	933.335	1963.37	150.784	616.956	6591.83	840.228	104.687	635.049	1871.87	205673	6475.08	2339.78	15390.6	7965.99	278.708	3869.41	24556.5	1333.49	962.78	326912	32393.8	47.8154	491489	209.02	379.208	1450.99	1999.7	1357.57	1816.7	68263.4	5868.92	4029.56	60261.2	5392.18
DS1_315	3658.64	1737.04	97655.8	2048.41	107.699	3523.39	46.4622	96362.5	9900.25	86608.6	38399.7	15763.3	1966.5	5012.16	234.46	228.006	592.839	369.63	4079.49	3173.34	1019.74	175.329	624.563	13606.8	111523	3262.3	3750.33	8333.25	1140.39	156.937	3562.65	8519.2	1055.75	390.346	131026	233316	52.4177	617108	436.543	280.041	2837.36	3420.91	777.878	375.456	16732.4	1439.71	3252.12	10872.6	917.412
DS1_316	7037.16	3222.05	107706	1901.3	477.662	5568.11	118.474	102919	11332.6	71532.4	48798.5	18235.4	1628.29	4998.92	109.07	382.508	643.821	261.358	3483.57	4517.25	631.904	178.608	274.965	12529.1	63265.7	1507.76	553.251	3089	1009.12	89.1425	1283.29	5325.13	1795.37	765.41	158513	173310	48.6559	602787	538.374	671.979	2431.14	3111.29	261.188	309.54	11635.1	1226.35	1572.36	8631.31	928.348
DS1_317	6584.16	1357.34	84077.2	6029.93	459.243	6190.77	267.256	95231.1	20662.8	67376.8	106009	16629.6	1240.12	3096.33	144.313	409.897	607.634	206.009	433.819	4903.29	583.444	54.3855	147.295	8904.97	94064.7	1589.16	410.76	2809.7	3287.63	169.171	975.753	8273.44	1254.88	962.918	187205	46750.4	33.6052	488550	319.927	458.967	1350.52	1352.95	662.522	2707.47	44558.3	3088.36	1873.85	36111	2492.5
DS1_318	2989.66	1617.39	114046	8251.88	1233.7	6441.87	458.852	32552.9	32427.6	57953.6	187942	5350.65	1142.25	3351.73	147.267	293.684	1132.56	136.15	224.091	8097.83	847.576	156.016	171.825	2272.92	143413	2227.4	349.973	3424	4405.52	231.106	562.281	9594.96	960.636	1187.43	397936	43229.3	48.2203	679277	198.726	708.403	1358.49	1226.25	1048.02	2948.12	72086.6	3893.31	2104.14	56977.5	3258.85
DS1_319	5159.75	1865.34	72825.6	4297.27	163.4	4209.64	348.522	105422	26120.4	60212.9	130053	16287.2	1080.71	3757.2	255.047	85.9647	634.711	291.575	2523.72	4048.3	969.06	0.0440452	193.945	6510.92	81514.5	3107.13	693.864	3582.85	2096.19	119.421	1229.39	6659.15	2637.97	498.254	174388	161383	62.143	463484	412.296	141.673	1905.44	5923.61	561.911	514.548	17757.5	2017.18	1049.31	14027	1704.69
DS1_320	7490.67	3251.09	79778.7	3486.97	323.487	4503.55		42024.6	19758	56802.8	40383.5	11717.5	1461.33	5209.55	155.387	221.364	644.011	68.4213	1398.77	6052.75	522.619	71.682	733.229	9861.29	69651.2	970.347	3024.9	5398.5	568.209	150.278	2111.38	3090.36	662.948	859.082	134101	61894	51.1557	496043	120.169	590.362	2239.5	3489.31	234.46	958.582	28233.1	1347.09	2034.99	20694.1	925.975
DS1_321	48310.8	27986.7	101839	3252.71	742.37	7572.46	222.603	35926.8	25837.5	59255.9	146006	7723.21	1182.97	3036.34	85.2222	281.973	1010.98	62.6593	316.138	5754.03	1055.73	126.342	176.195	5457.03	149179	916.674	380.888	2178.84	3731.27	327.328	318.755	6704.43	844.476	1247.62	313202	62732.2	75.8878	500560	374.666	1100.34	1719.8	1531.4	500.681	1586.3	54574.8	3395.74	2097.76	42685.8	2496.03
DS1_322	4330.7	2206.1	80985.8	9609.82	115.261	5512.66	1155.76	46081.6	45951.5	48050.6	213268	8062.5	1034.01	3112.94	206.371	1158.72	1605.17	167.59	348.834	5052.38	979.847	155.354	254.935	4970.51	134180	2198.65	710.806	6240.17	3199.12	315.409	1357.18	10189	707.713	948.08	210997	23787.7	35.0686	480355	309.398	461.698	1759.5	1281.71	890.84	2406.45	54796.3	4436.28	2032.88	54571.5	3108.32
DS1_323	7351.89	6966.96	106605	1744.02	233.363	1868.77	51.6902	25495.5	11569.4	44688.7	35348.1	3487.92	2384.88	5905.63	383.26	487.965	1019.98	251.94	2569.68	5111.54	680.18	878.51	506.607	11809.3	54873.3	1349.56	3355.2	6165.28	539.754	59.8612	3359.82	2981.48	3187.95	154.25	125889	206104	61.5038	876249	256.425	715.434	3312.93	4030.3	768.836	788.05	20015.4	805.487	2634.84	12628.8	681.464
DS1_324	5131.54	1428.16	92943.6	2792.06	27.0493	2377.19	419.766	70700.8	11783.5	96169.7	65470.1	12768.3	1478.6	5314.05	157.724	173.376	903.507	260.204	5406.42	1521.23	731.434	84.4096	1172.83	10727.4	137242	5461.22	6739.62	18246.1	1205.07	237.143	8215.08	16918.3	1109.33	277.899	126162	199244		547019	200.202	419.691	3502.98	6732.61	524.649	384.762	20637.8	929.281	5203.78	10698.4	783.064
DS1_326	5885.12	1540.31	107975	4155.18	296.629	3541.46	249.624	46152.8	19277.1	76337.2	40907.6	12763	1548.22	7250.29	160.239	179.914	589.179	170.657	1545.69	5198.92	1019.18	197.958	572.565	12646.8	85146.1	915.652	5199.36	4466.93	215.092	109.496	3452.86	2375.95	889.574	785	96547.2	120379		572022	106.598	877.779	3373.01	3857.57	659.198	845.807	25357.3	1637.57	1836.15	15915.4	1115.01
DS1_328	3094.62	659.737	83824	11989.8	21.3329	5209.69	834.975	51451.2	45553.2	95195.1	187993	14108.2	1279.75	4237.07	274.97	173.118	794.483	265.162	802.976	2515.22	1384.2	119.768	241.432	7842.32	111183	1798.2	894.703	2970.19	8484.98	148.546	1004.93	7339.89	2200.64	248.916	182886	100545	79.2073	592252		332.992	2354.52	3261.28	634.732	685.887	21197.1	1768.4	743.185	17221.5	1700.59
DS1_329	4539.68	2051.44	96178.7	12174.7	613.192	8035.68	618.735	30349.1	42750.4	41323.2	413002	8127.28	847.534	3039.07	230.923	433.233	1450.94	195.904	127.473	7265.13	1289.53	69.0674	2.01405	5626.39	70663.5	1226.46	2828.51	2379.82	3836.41	157.444	282.907	8509.67	1004.28	1379.75	256972	15694	42.1763	454362	167.382	619.466	1502.96	1077.55	1288.09	5415.94	76315.6	2469.8	2494.11	57810	2207.62
DS1_330	4721.84	1671.35	68291.8	23427	84.7145	9195.49	3099	32927	80251.6	31119.6	138013	9034.13	1112.64	3413.85	289.96	925.916	1118.34	206.181	260.003	6711.84	1502.29	174.665	10.8652	5205.75	58685	2831.15	906.714	607.801	3183.21	57.7787	90.7249	284.325	787.105	1679.65	218325	20753.2	49.9003	408186	32.452	895.236	1591.29	2489.14	1400.88	4978.7	65406.3	4350.73	1560.78	54366	3223.63
DS1_333	11127.1	4046.03	102904	3543.81	471.215	3475.51	183.294	41366.2	3512.33	48007.8	8942.97	9918.17	2088.37	6733.04	50.8141	424.939	141.356	515.697	4588.37	5178.03	1327.79	824.695	348.164	16339.8	20731.1	229.872	1990.72	1384.12		14.7547	1445.37	180.997	1092.91	525.898	36608	175823	77.8773	592496	348.348	811.296	4183.8	5272.28	1143.88	235.1	8873.21	370.992	1478.13	5586.35	214.82
DS1_335	8802.02	4080.34	120402	7198.76	267.784	6159.83	492.791	20949.3	4614.31	34573.2	5931.93	6754.33	2839.13	7647.45	134.431	182.684	142.603	70.3179	2973.37	6800.76	1218.16	235.417	40.5012	12497.4	8762.11	112.291	938.586	280.881	19.1517	5.49824	145.909		1539.13	523.275	31525.9	154229	50.8669	510392	54.3865	1264.19	4184.48	6290.57	878.08	150.178	6582.77	346.824	459.358	3876.14	162.648
DS1_337	8066.48	3674.21	96685.4	2093.68	162.608	3383.23	256.905	30619.2	9476.4	37447.4	32653.6	8655.26	1698.18	4435.06	9.20263	141.479	266.822	329.156	2642.28	5759.26	743.461	194.724	57.911	10741.7	10188.3	218.502	717.969	702.415		4.76333	507.852		577.552	520.592	52923.6	116691	46.4891	492127	314.624	698.795	2635.77	2773.12	1142.64	450.538	12185.3	392.375	774.44	8656.08	315.259
DS1_338	9657.02	4011.36	97984.9	2840.25	40.6029	5696.78	78.0978	13599.8	68.0579	20383.1	1722.35	2145.3	2577.84	7096.04	159.729	1388.15	107.739	695.336	2197.85	6366.21	1309.81	1488.32		15428.9	892.835								1048.39	598.298	24744.1	106584	70.5853	539199		1395.86	2933.65	4068.01	883.736	161.295	3594.56	37.2658	92.2007	2800.58
DS1_339	9141.65	4633.52	100855	4166.36	58.0948	2382.31	73.2645	7797.88	3871.13	16325.2	7437.62	1892.62	2664.02	7690.82	591.233	599.941	408.035	702.078	3479.69	4886.12	1305.22			13900.4	3863.69	75.0091				0.248221			1178.59	285.946	24679.5	87450.2	99.1501	645581	244.258	998.856	3055.78	2596.91	456.486	258.957	4913.69	71.0711	113.648	3055.32	335.397
DS1_340	3419.85	1595.55	65571.3	15444.9	22.1861	7376.23	831.815	17901.3	17038.6	41517.8	19690.5	4508.45	1645.73	6227.54	174.422	452.602	529.675	191.727	3790.9	4835.41	993.681	123.488	326.825	6824.7	133213	5268.27	12073.7	6546.16	3661.4	93.3521	2718.76	2147.55	700.837	725.522	117305	43281.3	40.1745	458826	213.858	873.32	2434.04	4106.3	1423.64	704.435	45585.1	5166.02	2420.71	28364.9	4388.36
DS1_341	7867.05	3830.84	110556	23835.7	111.296	6052.89	1907.02	15663	27265.9	19773.1	21539.6	3397	2073.71	6095.42	139.696	109.256	245.839	329.996	254.286	6291	1451.14	268.095	49.5407	11811.5	21914.2	1309.71	3975.4	643.321	777.43	81.957	329.305		267.267	561.211	60324.1	36588.3	43.4993	629838	74.5016	1533.23	3135.26	3328.21	305.493	495.05	16496.4	1163.19	166.31	8519.62	545.503
DS1_342	29451.8	30882.1	50390.7	10359.2		4.65772	1278.48	291.505	101763	18859.2	293718	82.6225	5621.36	12835.1		397.749	481.462	494.807	249.567	1661.18	47.6792	750.895	856.498	970.336	58541.4	2188.33	5036	5093.76	443.941	60.8905	2747.3	1094.94	282.321		71948.1	25319.2	224.913	1.51412e+06			2246.47	1274.33	294.866	351.113	19990.1	705.619	2134.63	9696.92	889.277
DS1_343	8586.35	4171.5	115384	3021.94	248.673	3985.24		38345.6	4334.31	55746.7	10784.7	8962.32	2289.56	5646.74	67.7841	267.601	138.256	712.38	3458.5	3718.78	1131.81	247.743	237.339	11739.6	27994.9	528.26	1659.38	2356.73	37.7883	15.7351	1761.24	1313.63	894.521	476.645	38585.9	173275	57.3969	563902	424.405	833.668	4121.67	4635.64	719.073	152.607	7899.02	203.491	1001.91	4581.14	258.525
DS1_344	7435.59	684.918	77052.2	3937.63	86.6744	4986.96	226.061	46274.7	28611.4	65094.4	131730	13612.9	1065.44	3960.07	257.438	208.531	845.591	164.85	650.204	3225.71	2053.22	130.279	198.29	6097.91	84180.1	1446.99	667.307	2575.71	6415.06	82.2505	724.865	3916.95	2115.56	470.469	153827	53298.3	34.5312	522779	83.9214	358.157	2165.16	3155.56	367.074	317.158	19448.6	2020.49	591.061	14664.1	1583.22
DS1_347	6013.09	2357.14	79412.1	3778.48	568.754	3173.97	251.487	70600.5	22252.5	61753.1	86679.7	12153.1	1512.54	3372.17	179.453	612.587	1433.15		1399.22	4910.62	1065.69		293.494	6598.52	107852	2343.47	604.114	4601.31	3060.27	185.267	984.4	11769	1269.88	746.307	215097	70932.6	71.7082	463287	442.137	522.395	2023.29	2713.38	1037.21	1235.18	39540.9	3293.47	2122.05	30788.8	3059.99
DS1_348	6022.34	2237.77	80957.1	9537.65	98.1687	4200.34	1004.92	27374.5	90519.2	43421.3	178228	9352.29	1351.38	3295.9	383.999	481.922	900.335	209.732	227.3	5195.22	1101.04	434.327	179.403	7648.39	77084.8	3661.33	1243.26	2348.72	1951.56	83.962	787.327	1493.82	530.26	1001.34	178603	34243.9	43.7875	458309	84.8978	572.833	1416.59	1888.84	1081.72	2483.42	50968.6	5235.98	1666.75	40682	3983.89
DS1_349	6309.36	2808.83	106907	5310.28	1124.3	7074.19	378.226	23810.1	43523.5	39776.3	156899	5001.27	1404.71	3908.31	323.584	427.742	1042.59	199.187	180.524	6324.56	713.41	155.797	519.104	4484.3	104857	1784.04	1309.73	9502.51	3696.81	233.218	2349.3	9469.36	1052.95	1269.65	280508	32419.5	53.2883	631878	307.435	733.272	1005.01	643.646	354.699	965.999	43497.8	3329.62	2233.06	36683.4	3069.92
DS1_350	4425.76	1787.15	61790.2	3844.64		4948.54	311.201	106357	17374.6	57257.8	118045	24780.9	1289.21	4281.29	210.126	104.762	789.686	174.188	2281.93	3051.38	914.8	75.1729	89.3804	7291.07	75442.2	2429.87	348.672	1959.77	2591.02	114.145	513.739	5829.96	1407.57	544.08	159861	102302	13.8101	354532	159.074	495.202	1848.93	5480.26	758.685	472.692	18896.3	3076.27	692.101	17334.4	2393.42
DS1_351	1910.48	955.614	55277.4	16521.9	53.8095	14756.2	1833.04	13511.6	173220	21707.4	884546	3411.58	924.49	2554.88	279.886	2439.96	1976.49	305.959	0.79341	6423.54	1514.26	108.984	57.0501	998.441	147482	731.097	610.714	1440.19	3640.48	428.527	208.891	4522.19	914.553	1968.69	314173	3241.32	12.2666	326155	297.489	677.3	2090.37	3272.22	1229.76	3084.91	62800.6	3120.68	2434.58	56225.6	2612.46
DS1_352	9934.08	2169.02	96641.1	7552.68	80.3319	7785.69	268.158	12860.6	13875.6	25407.6	20133.9	2958.08	1165.42	4357.76	290.459	152.019	302.058	452.316	2510.66	3219.48	1129.14	413.354	425.189	13567.1	21507.9	686.944	2309.84	3427	112.373	35.0286	1934.35	602.437	1633.41	512.852	43564	128544	63.6954	510332	32.4074	704.865	3393.19	5196.97	911.068	286.352	10708.8	158.327	1681.58	5483.23	187.496
DS1_353	3579.89	1475.61	80409	22144.6	165.682	11332.8	3948.01	14787.9	123794	31434.2	541155	2998.19	807.908	2725.69	497.046	980.824	1281.27	157.192	60.6653	4506.02	1155.48	136.581	82.544	2824.62	91220.8	3199.46	636.478	2847.86	6100.68	202.979	449.549	8619.37	1434.59	1269.68	314497	11600.6	35.1918	387011	213.849	498.225	1837.69	2372.13	2054.22	7823.56	125941	6523.03	4113.49	101570	4701.9
DS1_354	2813.03	1075.19	104045	3372.74	557.348	5324.97	191.161	30728.8	46789.2	66620.4	145591	7712.01	1334.53	4716.41	157.683	262.513	833.339	234.164	99.0088	4279.75	1082.56	159.648	646.024	7351.35	158133	3379.55	4186.39	6546.25	2698.18	238.321	4368.89	5660.81	518.815	1199.06	207679	30841.2		635374	234.791	755.889	1264.07	1228.43	304.26	1231.15	38653.4	2803.26	2386.23	30022.6	2704.63
DS1_355	7189.04	3068.67	100757	4457.15	381.458	5751.2	255.41	55039.4	18850.6	60384.4	74633.5	7621.31	2422.61	6547.05	128.97	328.535	794.346	265.326	735.222	2801.87	570.101	481.757	345.199	7708.46	104285	2054.28	593.598	4096.69	2507.58	195.618	1059.3	10633.9	733.297	669.577	222601	99080.6	39.3163	629140	243.824	599.266	2073.64	2042.92	519.54	1349.6	32961.3	2240.55	1619.2	27878.5	1541.86
DS1_356	7243.33	2761.1	78188	6561.74		3078.5	688.718	51795.8	28963.3	57380.6	66172	13897.2	1399.93	4634.59	264.203	38.6733	630.139	80.5228	4371.29	3330.18	1572.8	508.024	282.511	7580	64759.1	2605.6	1377.67	2830.11	1181.19	38.3072	848.363	2571.91	1177.8	469.751	90684.9	144330	22.5661	504208	270.645	659.575	2521.11	7522.99	1039.78	357.189	18095.6	1863.72	1209.27	13198	1220.84
DS1_357	10705.9	6191.61	88351.8	3978.19	455.404	3743.52	135.65	9879.99	1072.37	14302	3360.67	1085.6	2912.5	7102.78	99.1118	1.18461	327.986	532.579	1216.81	6429.65	1286.09	1156.78		21511.5	3561.85	27.517	153.431	284.194	68.3833	5.91142	155.391	95.4649	1812.38	811.602	32343.1	71420.4	67.56	676173		2468.08	2854.79	2477.7	47.2744	136.143	4131.08		154.39	3003.1
DS1_358	4977.01	2309.16	82404.5	4822.78	123.325	4976.56	381.404	26536.6	34629	38862.3	122224	5509.43	946.755	2691.11	399.187	312.132	855.714	251.861	489.535	4056.78	877.864	126.213	410.528	5607.53	101649	3973.26	652.769	3825.1	3209.61	173.275	1384.95	5338.04	576.992	738.897	224449	40118.9	55.8828	443180	266.946	753.587	1436.58	2339.85	1356.28	3136.69	59691.3	5249.03	1755.42	50092.8	4348.94
DS1_359	5977.62	5680.24	124241	2669.35	206.554	5150.23	45.3094	10904	2850.67	16794.1	6611.08	1595.4	2165.01	5521.3	180.162	306.449	313.734	409.799	820.24	5414.3	1611.08	311.947	107.027	23604	13872.2	106.292	587.967	1009.06		9.30837	414.619	401.292	688.091	631.239	45033.8	61396	76.2253	654677		2486.83	3950.21	3559.64	249.656	264.002	8182.85		409.926	4661.15	200.996
DS1_361	29945.5	20759.7	70492.2	2770.27	89.8604	3352.13	400.258	107312	13194	70112.5	45640.4	17602.6	1257.8	5408.76	400.521	147.565	786.411	68.8633	6234.48	3352.18	1503.78	115.837	1503.33	10116	107457	5910.75	7490.84	14985.3	1217.96	154.938	5910.04	10700	1580.52	488.66	128106	238498		373203	175.229	167.842	2137.8	5640.02	767.118	463.774	21368.5	1257.51	4890.96	10217	826.21
DS1_362	10774.8	5845.9	122946	3354.65	77.2289	1999.75	275.39	22917.7	12919.1	40233.6	25660.8	4234.6	2394.86	5165.61	270.753	331.839	630.628	335.939	5311.29	3479.84	1467.26	397.668	355.428	19853	25886.4	712.53	1040.02	2369.58	265.629	35.522	891.528	1191.17	991.197	309.232	84533.3	189258	35.053	754063	259.373	573.35	2815.12	2180.9	908.564	595.021	18712.4	626.972	1424	12687	607.169
DS1_363	7925.31	2618.52	94612.4	8350.47	67.1354	5824.43	1039.84	33206.7	17052.1	47408.2	30303.6	10853.4	1578.23	5580.68	94.402	1.70852	310.931	318.688	3213.29	4224.86	1449.16	93.423	645.455	13827.5	44425.3	657.497	4431.36	3642.19	201.66	19.8807	2215.32	1305.68	1025.84	610.927	55950.4	134264	52.4206	481446	125.53	665.713	3671.46	7507.79	624.777	439.849	16093.9	825.539	1697.53	8580.24	883.545
DS1_364	6044.19	3225.97	78245.6	3444.88	31.7871	4755.68	110.057	52992.5	17035.5	61728.3	64399.8	13392.4	1258.89	4375.79	111.485	246.087	723.71	25.5819	1103.5	3653.82	851.818	199.299	209.678	7775.79	90005.3	1621.76	573.901	2058.4	1428.5	173.747	627.686	6339.34	713.689	669.279	129750	67317.8	42.2659	475662	419.266	683.708	2553.75	4322.55	390.049	558.853	19146.5	2303.14	771.129	15299.2	2064.38
DS1_365	4408.91	2158.41	98713.7	7643.68	976.741	4383.86	1542.64	1766.32	217112	39312	1.15599e+06	79.1156	1092.31	2699.9	696.582	858.784	1169.46	277.852	10.9204	6803.35	669.901	223.289	1532.3		217893	6813.89	6486.11	28816.1	6043.78	416.81	10045.5	17673.1	831.918	1080.07	446846	8871.92		959376		819.976	356.654	213.499	3305.81	5630.54	130783	8485.99	8830.59	100984	7076.15
DS1_366	9145.62	1282.23	102964	2262.31	203.007	3523.89	127.817	110307	10256.8	101485	62144.9	18740.5	1469.17	3764.53	133.436	298.658	817.84	272.644	4037.87	2923.79	890.079	217.607	536.469	13032.5	92359	2504.62	3383.74	7246.42	968.41	155.06	3271.16	8711.71	1163.26	453.162	141622	172726		680716	343.396	197.678	2814.74	2776.86	217.223	649.199	21300.7	1119.9	2708.83	13438.7	969.048
DS1_367	7098.52	3693	84704.6	1396.81	178.96	3791.03		48064.1	12130.3	64555.2	38372.5	10156.8	1845.55	4252.2	93.1662	283.926	640.736	316.122	2572.4	2297.61	1147.72	235.259	841.429	8359.71	108268	2287.55	3954.12	9884.28	646.037	196.957	4946.81	9524.89	975.41	520.155	84907.8	117566	42.9067	684792	362.22	748.321	2348.2	3312.87	434.72	233.352	14649.6	1550.02	2517.76	10538.3	872.127
DS1_369	6777.04	2368	100584	5018.14	156.101	5200.7	446.705	20341.2	61021.1	40095	188719	4447.01	1267.15	3663.26	285.173	110.074	865.831	241.576	1251.43	3561.62	1093.84		381.999	9707.75	91150.8	3012.31	1004.93	3066.27	2049.11	163.828	1161.35	3021.38	712.565	482.373	178800	87031.3	68.9947	554012	219.592	475.742	2812.86	2788.92	791.822	915.081	31466.5	3168.29	1279.98	26689.4	2683.01
DS1_370	4729.15	1684.49	76434.7	5427.67	65.6375	7634.96	415.591	9633.25	57258.1	36890.3	308239	2081.82	1214.89	3329.84	333.428	1526.09	557.677	255.113	23.3143	6124.73	802.482	39.7937	225.448	3809.39	114075	1929.54	1508.46	2273.87	3121.14	187.723	568.268	1927.51	975.771	1331.7	266337	6494.27	46.0878	468264	97.1046	799.952	1795.77	2360.82	2674.29	2060.52	107629	9041.54	2787.23	88722.2	6790.35
DS1_372	6757.13	3050.14	99369.5	6294.96	239.188	5149.82	180.506	69673.5	19847.8	72229.4	59528.1	15242.5	1584.45	4238.17	135.408	476.166	962.245	230.255	1566.94	4179.21	806.402	324.351	1211.3	11464	78830.3	3215.55	5991.35	12317.3	1139	93.0147	5739.44	7964.96	1202.89	435.811	120199	157568	29.0682	620965	331.585	725.211	2217.2	2951.16	445.769	592.136	18279	1371.36	3137.44	8703.4	712.949
DS1_373	8649.89	6447.08	83515.3	11105.2	403.543	2978.6	24.0253	13082.3	1796.6	16681.5	5127.48	1777.04	2641.06	9235.99	378.195	0.4282	616.718	221.585	1766.26	10669.7	504.136	1634.18	123.978	19820.7	11488.9	35.5883	550.833	1434.36	172.869	3.16656	261.097	269.675	1611.52	929.859	65026.2	73510	131.884	564310		2586.88	2583.44	2123.57	533.171	424.717	9552.46	277.092	359.362	6372.57	178.833
DS1_374	5593.65	2243.84	72757.7	12101.3	66.6448	7232.13	635.337	36614.2	19589.9	40571.5	40251.4	11575.7	1272.85	4585.37	186.123	105.284	404.027	77.0769	1915.45	4565.1	1690.47	88.5101	514.056	8832.16	43693.6	1632.73	3768.22	4911.38	645.922	51.796	2308.34	1610.63	952.389	573.74	72295.1	77334.3	47.3317	351367		535.158	2730.51	7494.05	1404.08	1053.96	27991.4	2190.07	1880.12	19748.4	1936.47
DS1_375	5848.91	5050.63	123528	5062.93	496.539	3080.32	120.998	37695.1	17839.9	69038.5	61364.3	8929.49	1744.71	4588.73	89.1698	277.347	858.146	422.042	868.153	3149.67	1026.9	190.85	510.535	13426.2	75421	956.47	2996.3	5777.45	570.101	109.708	3061.94	4939.75	568.585	392.008	142722	104119		791096	397.643	506.619	3155.75	2726.76	253.763	421.529	18939.5	736.019	2237.48	11721.8	555.523
DS1_376	4480.63	1415.58	70403.2	15125.3	119.049	8999.25	756.382	62284.5	13421	43437.2	18140.2	20629.3	1347.69	4986.17	179.889	156.61	298.113	286.399	1887.69	4875.87	1792.29	153.069	184.411	6819.78	28403.4	560.457	2887.76	1731.89	47.6109	15.6916	827.896	394.608	1842.76	1131.2	51701.1	103314	84.4196	306563		926.752	2783.14	7933.84	1611.28	606.12	17987	1143.33	1187.81	11882.6	796.035
DS1_379	19797.7	3203.51	121653	12404.4	279.226	4072.53		61870.2	12900.8	91353.5	49246.2	10880.1	2242.81	6126.33	182.218	319.455	563.711	89.8013	1577.52	3073.79	1110.4	382.576	477.041	12719.2	113570	2602.15	4393.23	4561.19	1358.6	191.715	2376.65	4832.15	891.276	374.821	142535	155471	40.4851	709880	494.093	455.205	1767.91	1792.65	337.506	275.289	17381.7	854.722	2298.11	10297.9	843.298
DS1_380	13640.2	7366.4	109907	8385.65	443.325	2506.09		3242.91	1342.12	4508.11	4468.76		2793.21	10233.7	265.245	275.743	255.317	474.009	1098.59	3011.7	439.519	477.401		25735.4	4719.31		369.387	195.232	4.28652				776.874	338.02	33825	53740.9	134.941	905526		3722.02	2213.74	2355.86		245.441	4239.24		149.932	2741.66	62.6344
DS1_384	6215.47	2867.35	100280	5619.13	704.268	9891.99	541.085	19341.3	85551.6	47500.8	174333	3650.65	1531.62	3523.67	485.277	512.632	977.324	162.189	166.948	3441.31	807.191	429.289	422.479	2757.94	93895.9	4778.34	1521.48	3511.23	3586.66	170.259	1246.07	3168.01	480.228	975.083	317039	19061	52.1909	616819	327.7	604.382	1490.55	1194.56	640.946	1589.1	58966	4783.01	1979.09	50758.5	4596.41
DS1_385	6831.26	4614.98	90345.2	3292.71	138.863	3643.05	215.497	70623.1	16177.3	65113.8	46454	16121.7	1816.81	4617.69	207.474	238.422	622.037	162.587	2821.39	4442.1	926.129	169.765	940.58	11377.1	63976	1033.04	4987.02	7295.11	435.014	93.7543	5626	3990.08	365.289	661.656	136016	134462	37.6723	584690	257.095	767.299	2778.61	4753.29	438.267	585.79	19081.6	1029.66	2339.63	10872.6	701.171
DS1_388	4022.9	1778.62	78278.4	14929.1	1200.57	6965.7	2006.56	30393.3	113841	34146.5	476934	5146.42	888.706	2437.16	843.249	1697.77	2463.36	194.716	222.857	9952.25	912.481	113.557	333.23	3489.12	102256	5398.37	1082.26	4795.58	4432.78	188.179	1091.64	7863.11	1536.65	1754.59	286928	11410	35.0278	399068	176.151	789.082	1339.29	1064.48	2299.54	7508.6	103691	3713.07	3873.05	82625.9	3095.67
DS1_390	6282.8	4168.28	86816.7	2523.81	129.449	5849.75	235.631	139857	9718.39	79906.1	26251.6	25479.3	1888.16	4082.06	79.6224	13.4039	484.638	45.302	3264.62	5246.31	876.228	428.155	686.093	8776.59	73054.2	1869.79	5043.5	14032.1	683.808	72.3916	6677.63	7777.24	835.359	950.277	121940	152552	56.081	437777	221.596	560.549	2536.08	5012.09	230.104	551.524	22967.5	736.588	3732.41	14007.1	769.769
DS1_399	5385.85	2155.3	120733	9327.33	1209.47	9130.49	910.229	9138.54	64036.4	28785.5	288061	2390.98	1120.64	3147.17	267.612	1435.13	1362.67	44.5256	137.725	6105.35	914.263		125.373	1450.52	117891	3710.08	344.065	3326.53	4451.47	205.309	574.06	9283.21	781.046	1361.57	288085	13256.8	36.8637	640516	277.79	484.933	1069.02	606.258	919.899	3382.04	79666.2	4405.51	1722.14	66008.4	4112.61
DS1_400	8606.59	4387.02	95800.2	12794.2	161.447	1417.47	127.5	28955.1	16642.4	54002.7	75813.7	4561.91	2472.88	5354.1	156.873	404.29	892.088	418.431	4085.54	2349.07	831.212	513.794	1312.9	12617.3	60577	1321.9	3853.72	7079.21	527.517	66.2395	3815.59	2903.55	727.12	187.568	94047.9	164988	85.2383	881895	160.872	571.491	2525.49	2664.87	459.983	251.964	16061.4	595.109	3111.25	9218.91	590.928
DS1_407	7290.15	3143.07	95001.1	5182.19	178.98	3236.86	832.291	85148.1	7946.23	59049.7	22049.7	14646.9	1536.25	6492	243.496	244.657	527.927	129.592	4440	7102.17	2204.87	265.375	294.327	8787.92	72714.9	1564.21	503.027	3082.46	1980.52	125.58	796.795	5742.25	1610.66	535.399	193380	91806	56.862	581000	210.57	463.812	2633.98	3195.54	458.579	235.593	22241.1	2144.84	1472.4	17686.8	1557.28
DS1_411	10092.1	2474.12	99238.7	2536.21	238.116	3157.13	222.457	44777.6	14668.7	65448.5	43228.7	9407.25	1775.37	5716.05	148.675	49.0612	583.078	161.03	2614.51	2764.76	806.52	87.7172	1174.15	14662.7	87127.3	2991.72	5444.21	10475.8	1080.8	123.571	5329.87	8477.81	1148.08	368.61	126149	198279	49.8808	620303	361.049	600.773	2712.24	3638.48	494.754	326.724	19963.5	1466.09	3913.67	11649.6	738.204
DS1_412	5995.98	3501.41	77289.3	2661.81	171.342	3891.41	158.114	101277	16487.1	82389.2	62052.2	22651.9	1563.73	4311.33	124.182	239.259	725.342	210.076	1891.09	2409.99	915.012	98.3663	123.047	7956.81	89831.1	1635.98	390.114	2037.57	1450.05	127.912	546.207	8436.62	949.957	571.669	138042	97793.8	47.8782	645644	234.495	454.608	2621.42	3138.59	352.026	627.683	15242.4	1876.92	784.417	12460.4	1595.18
DS1_413	8756.76	3550.99	110109	742.597	147.649	4429.66	45.1864	71120.1	1532.54	69773.5	9771.98	15682.3	2117.8	5600.1	92.0728	319.979	570.169	375.566	26784.9	2730.85	1117.73	569.315	1134.14	16323.1	74656.4	1710.91	4053.47	8893.86	743.314	123.133	4767	5990.14	1499.08	553.493	122581	196282	68.4338	650032	466.508	243.701	3259.57	3840.14	305.836	168.423	16907.9	588.648	3607.27	9399.16	577.259
DS1_414	9048.34	4119.86	96747.3	2954.2		4207.64	184.49	27256.7	2393.57	33660.8	6203.52	4191.19	2457.5	10166.8	266.565	367.139	430.548	293.185	3442.59	4253.88	1235.74	243.778	427.89	13344.1	29646.6	679.491	1137.47	1957.87	32.692	5.8811	948.797	863.864	1685.66	551.244	74802.6	215295	53.0383	545117	220.362	1253.69	4318.52	5821.88	1227.77	284.88	11506.7	540.581	1246.39	7938.19	199.357
DS1_415	7144.99	3048.73	91227.7	2979.79	496.801	6759.25	162.386	92732.2	10868.5	73731.9	34917.1	17888.2	1976.79	4534.13	117.683	86.2054	567.308	249.388	3117.37	4521.06	837.499	194.857	280.001	9778.55	64047.3	1508.42	1069.86	3286.69	986.72	65.3273	1500.89	4506.12	585.898	720.88	111486	112123	44.3862	662087	194.194	607.867	2885.25	3849.12	304.401	172.081	16880.9	941	1909.68	11044.8	517.131
DS1_417	71935.9	74145.2	78447.4	789.446	350.024	2173.44		5590.96	1350.51	7794.71	3786.82	2556.98	3090.96	5703.03	56.3506	131.931	44.676	101.362	515.188	6004.4	1180.5	279.272		22380.1	4728.46		351.188	229.3		0.447623			96.0764	103.885	21173.1	5764.29	91.6899	658442		6408.92	3424.48	3304.24	63.1635	203.618	3927.77		89.5024	2142.15	85.927
DS1_419	8434.67	5693.18	70552.2	908.704	315.057	2380.71		12450.3	598.694	15185.7	1692.97	3410.33	3307.54	8453.73		301.753	203.193	332.61	236.595	9209.35	1317.34	348.21		24233.1	3503.05				145.451					339.836	30740.6	5093.95	180.542	667474		4624.21	3735.65	4658.74		470.434	8824.44	191.691		6133.75
DS1_420	7621.98	3739.6	85182.5	2098.25	589.338	3768.95	50.7665	53881.2	20400.8	74485.4	54893.8	13598.9	1558.59	3396.76	108.075	220.175	527.053	341.27	132.821	4115.89	1621.12	171.303	435.795	5903.96	70956.2	802.366	2683.74	4597.71	4643.9	115.779	2414.27	4289.08	1982.92	538.065	108929	26590.5		822070	176.796	772.405	1316.2	993.562	68.6979	326.561	17159.8	949.378	1350.06	12486.7	979.593
DS1_421	3758.07	1577.79	74215.6	10846.5	785.959	6667.43	1288.28	18361.7	45015.8	30780.5	263759	4058.22	1006.24	3221.27	332.751	1372.43	1304.7	288.399	48.4767	9600.62	1723.72	270.095	245.525	3307.24	90489.2	2748.98	1327.75	4030.63	2685.9	268.008	1033.1	6229.21	724.791	1544.83	264885	8937.18	42.5202	343491	130.794	983.211	1117.21	917.321	571.26	2930.24	45594.5	2275.33	1670.2	40048.1	2029.21
DS1_423	7761.15	2863.92	98525.4	7607.81		6146.12	341.057	56770.5	2615.04	46543.2	6992.63	15690.3	1827.01	7305.42	116.295	197.476	120.715	139.498	4728.7	3530.97	1755.22	213.889	76.5022	15606.9	14029.9	211.659	990.386	779.548	19.27	8.39939	229.833	70.9045	1348.31	641.367	28519.9	138183	30.7652	427133	94.8135	1087.95	3958.13	8253.7	778.875	372.582	6858.23	337.542	602.53	4373.02	295.866
DS1_424	7123.53	3171.51	95585.8	3908.24	110.894	7156.54	223.16	47748.4	9026.8	48007.4	20688.2	11820.2	1873.7	4961.18	119.921	265.627	478.794	84.4442	3097.82	5594.79	1493.37	154.746	370.653	8590.99	41086.7	711.165	2931.01	4083.47	200.183	24.9316	2877.28	1858.97	732.439	724.349	85907.8	134846	44.3885	475088	53.0255	926.849	2945.89	4791.21	1300.1	497.018	20091	1099.8	2109.63	13068.1	802.899
DS1_425	6298.8	2941.06	96298.7	2874.81	48.4259	3166.04	190.744	40245.2	27306.5	57324.4	65760.6	5473.27	1227.03	4013.66	209.716	217.801	716.644	167.432	1311.39	4264.91	852.427	135.876	1617.84	7298.07	91279.1	3826.45	5950.53	18154	1315.26	146.043	9576.52	6832.88	925.757	586.675	173483	70647.4	43.3803	552204	282.65	785.056	3234.65	4134.15	415.736	383.821	25177.9	1833.73	4113.16	15559.9	1334.02
DS1_431	4031.64	1626.07	87113.5	9067.32	839.976	11260.3	900.533	12854.9	95609.3	30024.3	653823	3223.89	1046.03	2639.94	526.297	943.861	1849.62	208.44		7523.39	882.361		223.375	1574.68	97794.2	906.331	800.037	3325.33	4693.13	205.09	721.013	10979.9	769.25	2170.56	367639	9688.12	81.727	451196	261.892	871.369	1175.21	1152.92	1353.87	4017.3	115233	3284.91	3339.89	96913.7	2494.22
DS1_436	7201.03	3435.51	120166	2344.76	334.073	5597.12	131.605	62816.8	14533.9	70335.9	69204.3	12509.6	1633.45	4563.58	102.062	226.941	408.338	368.376	2199.04	2845.67	1015.16	159.02	238.84	8671.22	79274.8	1428.44	441.384	2764.3	1778.75	132.904	615.233	5801.41	1114.9	569.77	173582	138463	49.3979	626040	323.056	421.42	3438.85	4530.65	505.251	614.976	17350.5	1625.9	1017.86	14584	1331.19
DS1_444	6286.53	2708.65	74345	1895.33	87.2627	3437.64	131.408	64914.8	9053.19	59802.3	33065.4	13918.6	1496.49	5175.22	238.841	190.456	579.156	101.055	4890.16	3599.77	1418.99		977.267	10135.4	70218.2	2839.26	5082.55	11846.9	578.141	85.1033	4790.59	7292.36	1841.04	574.585	95918.2	173589	29.778	629140	233.14	616.574	2659.62	3922.54	443.672	484.015	18153.7	1165.79	3692.29	10118	705.867
DS1_445	3956.85	1853.48	61783.5	7570.03	75.7688	5379.68	479.515	30438	74794.5	43335.3	324005	6745.51	828.135	2472.27	449.648	703.353	1561.18	296.008	639.563	4320.61	655.712	15.0338	562.886	3800.42	136014	2833.96	2001.39	6983.87	4227.41	172.966	2666.61	8408.53	1091.57	1426.27	273224	36333.2	59.1878	439122	245.968	543.22	1681.33	1937.11	1163.44	1909.82	54534.9	3235.16	2353.47	42323.1	2712.43
DS1_446	4710.64	1968.24	77893.4	9574.64	200.673	5761.03	615.255	72984.2	42523.3	67052.7	319060	17750.1	1007.79	3425.19	406.243	491.819	836.638	113.229	88.3475	5005.51	595.31	175.6	638.267	5926.97	85153.6	2823.19	1277.76	5622.28	3416.84	119.773	1682.82	6889.83	1097.17	952.881	230446	19756.1		460639	153.972	320.891	1363.07	1386.99	803.436	1665.12	44847.2	2818.47	1699.66	36461.2	2487.41
DS1_447	7422.04	2726.2	91596.7	14882	109.361	4418.8	142.553	60757.3	12447.1	60874.8	53489.7	11226.3	1361.54	4476.46	54.5295	219.731	572.275	374.658	2343.27	2790.46	869.858		203.506	8656.46	74437.6	1416.6	687.766	2450.63	1737.3	91.7093	725.457	5223.75	1168.85	505.269	100655	128777	26.3172	888237	271.064	388.401	1896.27	2705.62	360.533	400.287	15197.9	1444.11	1215.08	12142	934.236
DS1_448	6982.57	2962.24	91775.2	3732.52	78.1863	4960.44	309.308	55981.3	16816.9	66338	51601.5	13363.4	1404.77	4296.42	174.031	129.59	456.653	73.2443	2927.44	3435.63	1117.41	200.563	206.434	9784.71	60349.9	1211.1	533.288	2894.42	1565.02	77.7356	522.527	5123.52	1835.54	480.785	148423	173553	48.3196	606514	236.601	463.997	2306.77	3952.06	562.476	341.266	15552.7	1242.67	1077.08	12527	1102.53
DS1_449	7560.77	3335.1	79399.3	4647.65	163.3	3487.38	165.724	21372.8	332.871	20136.5	2358.34	3398.69	2569.3	7880.67	160.183	294.31	150.277	697.539	1334.25	9485.4	961.585	416.429		10667.5	3296.97	51.2544		116.501		0.445276			868.435	742.16	36338.9	59356.9	91.1999	534541	121.833	2502.63	3224.58	3980.73		161.099	3485.69	129.913		2819.18
DS1_450	9406.12	4434.97	100270	3220.65	94.7668	3029.23	371.002	30153.8	8155.82	51886.2	24401.6	6781.3	2010.25	7575	121.984	15.5058	153.72	547.55	3957.56	2922.39	1106.11	501.036	432.448	13818.4	56136	1249.03	3649.93	6218.55	87.5268	33.839	3326.88	3363.43	678.156	331.374	75717	179996	50.12	696016	205.232	930.202	3555.29	5022.91	937.934	527.606	22222.4	1036.56	2389.83	13798.5	835.071
DS1_451	6922.72	3079.17	90929.8	1588.78	90.0062	4192.38	95.0489	76679.5	6909.25	65730.8	22557.8	13433.4	1926.9	5296.03	155.839	185.854	813.019	55.9404	2903.26	2951.8	1316.05	191.117	358.195	8997.7	66356.9	2454.4	1789.15	3961.76	1118.35	88.5416	1613.68	5510.28	1677.29	452.849	110779	144637	39.2863	570795	275.612	784.78	2297.54	4372.37	529.925	146.737	11778.1	1405.53	1981.73	8495.07	1121.1
[truncated: 114 more columns]
